# Supplementary material
Source: bioRxiv or medRxiv preprint supplement (https://www.biorxiv.org/highwire/filestream/72700/field_highwire_adjunct_files/0/237255-1.pdf)
Supplement: Supplementary file [file 237255-1.pdf]

Table S1. *V. nonalfalfae* secretome predicted using Genialis bioinformatics platform

| Gene ID  | Blastp hits against nr database at NCBI                                                        | Coverage | E-value | Signal peptide (SignalP) | Signal peptide (Phobius) | Localization (WoLF PSORT)                       | Transmembrane domain (SignalP) | Transmembrane domain (Phobius) | Length | Number of Cys | RNA-Seq FC | RNA-Seq p-value | RNA-Seq FDR | 2D-DIGE | LOCALIZER                    | ApoplastP      | ApoplastP - Probability |
|----------|------------------------------------------------------------------------------------------------|----------|---------|--------------------------|--------------------------|-------------------------------------------------|--------------------------------|--------------------------------|--------|---------------|------------|-----------------|-------------|---------|------------------------------|----------------|-------------------------|
| Vna1.8   | hypothetical protein BN1723_013625 [Verticillium longisporum]                                  | 92.84    | 0       | yes                      | yes                      | extr 27                                         | 1                              | 1                              | 475    | 4             | 1.68       | 0               | 0           | no      |                              | Non-apoplastic | 0.64                    |
| Vna1.19  | cellulose-growth-specific protein VDBG_02532 [Verticillium alfalfae VaMs.102]                  | 98.14    | 0       | yes                      | yes                      | extr 13, cyto 9, mito 3                         | 0                              | 0                              | 429    | 12            |            |                 |             | no      |                              | Non-apoplastic | 0.62                    |
| Vna1.26  | hypothetical protein BN1708_007142 [Verticillium longisporum]                                  | 94.29    | 9E-94   | yes                      | yes                      | extr 19, cyto 2, pero 2, cyto_pero 2            | 0                              | 0                              | 359    | 10            | -4.71      | 4.64E-09        | 1.67E-07    | no      |                              | Non-apoplastic | 0.71                    |
| Vna1.29  | glycosyl hydrolase family 43 protein VDBG_02544 [Verticillium alfalfae VaMs.102]               | 99.6     | 0       | yes                      | yes                      | extr 19, mito 3, cyto 2.5, cyto_nucl 2          | 0                              | 0                              | 498    | 2             |            |                 |             | no      |                              | Non-apoplastic | 0.63                    |
| Vna1.34  | glucan 1,3-beta-glucosidase VDBG_02550 [Verticillium alfalfae VaMs.102]                        | 99.87    | 0       | yes                      | yes                      | extr 24, E.R. 1, golg 1, vacu 1                 | 0                              | 0                              | 795    | 12            |            |                 |             | yes     |                              | Apoplastic     | 0.77                    |
| Vna1.40  | hypothetical protein BN1708_007152 [Verticillium longisporum]                                  | 71.79    | 0       | yes                      | yes                      | extr 25                                         | 0                              | 0                              | 908    | 6             |            |                 |             | no      |                              | Apoplastic     | 0.64                    |
| Vna1.53  | hypothetical protein BN1708_013066 [Verticillium longisporum]                                  | 88.79    | 9E-124  | yes                      | yes                      | extr 17, plas 4, E.R. 3, mito 2                 | 0                              | 0                              | 345    | 11            |            |                 |             | no      |                              | Non-apoplastic | 0.64                    |
| Vna1.54  | hypothetical protein BN1708_007165 [Verticillium longisporum]                                  | 78.64    | 0       | yes                      | yes                      | extr 22, golg 3                                 | 0                              | 0                              | 339    | 6             | 1.96       | 0               | 0           | no      |                              | Non-apoplastic | 0.52                    |
| Vna1.63  | hypothetical protein VDAG_09774 [Verticillium dahliae VdLs.17]                                 | 75.49    | 0       | yes                      | yes                      | extr 23, cyto 2                                 | 0                              | 0                              | 355    | 7             |            |                 |             | yes     | Chloroplast (0.982   69-149) | Apoplastic     | 0.83                    |
| Vna1.65  | hypothetical protein BN1708_009506, partial [Verticillium longisporum]                         | 60.08    | 0       | yes                      | yes                      | extr 27                                         | 0                              | 0                              | 544    | 6             |            |                 |             | no      |                              | Apoplastic     | 0.65                    |
| Vna1.67  | cell wall surface anchor signal protein [Verticillium dahliae VdLs.17] EGY19319                | 99.5     | 5E-126  | yes                      | yes                      | extr 19, mito 2, cyto 2, cyto_mito 2            | 1                              | 1                              | 315    | 7             |            |                 |             | no      |                              | Apoplastic     | 0.67                    |
| Vna1.84  | acetyl xylan esterase VDBG_02605 [Verticillium alfalfae VaMs.102]                              | 98.55    | 0       | yes                      | yes                      | extr 21, mito 2, E.R. 2                         | 0                              | 0                              | 276    | 6             |            |                 |             | no      |                              | Non-apoplastic | 0.61                    |
| Vna1.122 | glutamyl-tRNA(Gln) amidotransferase [Verticillium dahliae VdLs.17] EGY22143                    | 91.14    | 0       | yes                      | yes                      | extr 27                                         | 0                              | 0                              | 641    | 3             | -6.80      | 1.78E-28        | 1.71E-26    | no      |                              | Apoplastic     | 0.57                    |
| Vna1.124 | hypothetical protein BN1708_004808 [Verticillium longisporum]                                  | 98.48    | 0       | yes                      | yes                      | extr 17, plas 4, vacu 4                         | 0                              | 0                              | 591    | 35            |            |                 |             | no      |                              | Apoplastic     | 0.63                    |
| Vna1.129 | carboxypeptidase B VDBG_02663 [Verticillium alfalfae VaMs.102]                                 | 99.54    | 0       | yes                      | yes                      | extr 15, mito 8, cyto 2                         | 0                              | 0                              | 436    | 6             |            |                 |             | no      |                              | Non-apoplastic | 0.74                    |
| Vna1.130 | hypothetical protein VDBG_02664 [Verticillium alfalfae VaMs.102]                               | 97.25    | 0       | yes                      | yes                      | extr 25                                         | 1                              | 1                              | 327    | 4             |            |                 |             | no      |                              | Non-apoplastic | 0.64                    |
| Vna1.139 | conserved hypothetical protein VDBG_02676 [Verticillium alfalfae VaMs.102]                     | 98.47    | 0       | yes                      | yes                      | extr 9, cyto 8.5, cyto_nucl 5.5, pero 4, mito 3 | 0                              | 0                              | 391    | 5             |            |                 |             | no      |                              | Non-apoplastic | 0.8                     |
| Vna1.150 | hypothetical protein BN1708_009660 [Verticillium longisporum]                                  | 81.37    | 8E-135  | yes                      | yes                      | extr 19, mito 4, plas 1, pero 1, E.R. 1, golg 1 | 1                              | 1                              | 263    | 5             |            |                 |             | no      |                              | Non-apoplastic | 0.75                    |
| Vna1.154 | choline dehydrogenase [Verticillium dahliae VdLs.17] EGY22173                                  | 73.4     | 0       | yes                      | yes                      | extr 25                                         | 0                              | 0                              | 624    | 6             |            |                 |             | yes     |                              | Non-apoplastic | 0.54                    |
| Vna1.158 | predicted protein VDBG_02696 [Verticillium alfalfae VaMs.102]                                  | 97.56    | 3E-81   | yes                      | yes                      | extr 25                                         | 1                              | 0                              | 120    | 8             | 3.13       | 0               | 0           | no      |                              | Apoplastic     | 0.7                     |
| Vna1.164 | hypothetical protein BN1708_014630 [Verticillium longisporum]                                  | 87.45    | 2E-125  | yes                      | yes                      | extr 17, mito 7, cyto 3                         | 0                              | 0                              | 247    | 7             |            |                 |             | no      |                              | Apoplastic     | 0.72                    |
| Vna1.168 | hypothetical protein BN1708_014626 [Verticillium longisporum]                                  | -        | -       | yes                      | yes                      | extr 15, plas 4, mito 3, E.R. 2, vacu 2         | 0                              | 0                              | 77     | 6             |            |                 |             | no      |                              | Apoplastic     | 0.59                    |
| Vna1.172 | arylsulfatase VDBG_02714 [Verticillium alfalfae VaMs.102]                                      | 99.17    | 0       | yes                      | yes                      | extr 22, mito 2, vacu 2                         | 0                              | 0                              | 606    | 8             |            |                 |             | no      |                              | Non-apoplastic | 0.75                    |
| Vna1.175 | hypothetical protein BN1723_016171 [Verticillium longisporum]                                  | 98.72    | 3E-109  | yes                      | yes                      | extr 22, mito 2, cyto 2, cyto_mito 2            | 0                              | 0                              | 229    | 6             |            |                 |             | no      |                              | Non-apoplastic | 0.54                    |
| Vna1.177 | choline dehydrogenase VDBG_02720 [Verticillium alfalfae VaMs.102]                              | 99.22    | 0       | yes                      | yes                      | extr 22, pero 2, cyto 1.5, cyto_nucl 1.5        | 0                              | 0                              | 641    | 5             |            |                 |             | yes     |                              | Non-apoplastic | 0.52                    |
| Vna1.178 | hypothetical protein BN1708_002595 [Verticillium longisporum]                                  | 96.6     | 0       | yes                      | yes                      | plas 17, extr 6, mito 1, cyto 1, E.R. 1, golg 1 | 0                              | 1                              | 728    | 10            |            |                 |             | no      |                              | Non-apoplastic | 0.99                    |
| Vna1.179 | endothiasepsin [Verticillium dahliae VdLs.17] EGY22204                                         | 98.31    | 2E-123  | yes                      | yes                      | extr 22, mito 2, cyto 1.5, cyto_nucl 1.5        | 0                              | 0                              | 432    | 3             |            |                 |             | no      |                              | Apoplastic     | 0.73                    |
| Vna1.190 | hypothetical protein BN1708_010165 [Verticillium longisporum]                                  | 40.25    | 4E-44   | yes                      | yes                      | extr 25                                         | 0                              | 1                              | 244    | 4             |            |                 |             | no      |                              | Apoplastic     | 0.86                    |
| Vna1.193 | pectin lyase B [Verticillium dahliae VdLs.17] EGY22218                                         | 92.09    | 0       | yes                      | yes                      | extr 15, cyto 8.5, cyto_nucl 5                  | 0                              | 0                              | 385    | 6             | 2.42       | 3.97E-08        | 1.24E-06    | no      |                              | Apoplastic     | 0.86                    |
| Vna1.217 | lipase VDBG_02767 [Verticillium alfalfae VaMs.102]                                             | 99.46    | 0       | yes                      | yes                      | extr 22, pero 2, cyto 1.5, cyto_nucl 1.5        | 0                              | 0                              | 551    | 11            |            |                 |             | no      |                              | Non-apoplastic | 0.64                    |
| Vna1.224 | hypothetical protein BN1708_009206 [Verticillium longisporum]                                  | 92.87    | 0       | yes                      | yes                      | extr 27                                         | 0                              | 0                              | 533    | 9             |            |                 |             | no      | Chloroplast (0.957   22-46)  | Apoplastic     | 0.62                    |
| Vna1.234 | predicted protein VDBG_02787 [Verticillium alfalfae VaMs.102]                                  | 97.39    | 2E-76   | yes                      | yes                      | mito 14, extr 8, mito_nucl 8                    | 0                              | 0                              | 115    | 6             |            |                 |             | no      |                              | Non-apoplastic | 0.54                    |
| Vna1.235 | conserved hypothetical protein VDBG_02788 [Verticillium alfalfae VaMs.102]                     | 98.88    | 0       | yes                      | yes                      | extr 21, mito 4.5, cyto_mito 3.5                | 0                              | 0                              | 535    | 7             |            |                 |             | no      |                              | Non-apoplastic | 0.52                    |
| Vna1.237 | hypothetical protein BN1708_015758 [Verticillium longisporum]                                  | 96.67    | 0       | yes                      | yes                      | extr 26                                         | 0                              | 0                              | 330    | 9             |            |                 |             | no      |                              | Apoplastic     | 0.85                    |
| Vna1.238 | arabinan endo-1,5-alpha-L-arabinosidase A VDBG_02791 [Verticillium alfalfae VaMs.102]          | 99.69    | 0       | yes                      | yes                      | extr 23, mito 3                                 | 0                              | 0                              | 320    | 2             |            |                 |             | no      |                              | Apoplastic     | 0.76                    |
| Vna1.239 | hypothetical protein BN1708_015760, partial [Verticillium longisporum]                         | 97.48    | 7E-77   | yes                      | yes                      | extr 27                                         | 0                              | 0                              | 119    | 4             |            |                 |             | no      |                              | Non-apoplastic | 0.56                    |
| Vna1.243 | hypothetical protein BN1708_015764, partial [Verticillium longisporum]                         | 80.25    | 0       | yes                      | yes                      | extr 27                                         | 0                              | 0                              | 476    | 6             |            |                 |             | yes     |                              | Apoplastic     | 0.87                    |
| Vna1.269 | hypothetical protein BN1723_004406 [Verticillium longisporum]                                  | 64.16    | 0       | yes                      | yes                      | extr 13, mito 4, plas 4, E.R. 2, mito_nucl 2    | 0                              | 0                              | 622    | 22            |            |                 |             | no      |                              | Non-apoplastic | 0.56                    |
| Vna1.282 | conserved hypothetical protein VDBG_02837 [Verticillium alfalfae VaMs.102]                     | 99.34    | 0       | yes                      | yes                      | extr 27                                         | 0                              | 0                              | 457    | 16            |            |                 |             | no      |                              | Apoplastic     | 0.7                     |
| Vna1.285 | hypothetical protein BN1708_010493 [Verticillium longisporum]                                  | 99.56    | 2E-157  | yes                      | yes                      | extr 20, plas 3, mito 2                         | 0                              | 1                              | 726    | 9             | -3.64      | 8.55E-37        | 8.61E-35    | no      | Chloroplast (0.953   68-102) | Apoplastic     | 0.76                    |
| Vna1.288 | fungal cellulose binding domain-containing protein VDBG_02845 [Verticillium alfalfae VaMs.102] | 99.06    | 0       | yes                      | yes                      | extr 25                                         | 0                              | 0                              | 320    | 3             | 3.96       | 0               | 0           | no      |                              | Apoplastic     | 0.78                    |
| Vna1.290 | hypothetical protein BN1723_011849 [Verticillium longisporum]                                  | 97.34    | 0       | yes                      | yes                      | extr 18, cyto 4, mito 2, plas 2, cyto_nucl 2    | 1                              | 1                              | 826    | 4             |            |                 |             | no      |                              | Non-apoplastic | 0.68                    |
| Vna1.306 | predicted protein VDBG_02868 [Verticillium alfalfae VaMs.102]                                  | 98.44    | 2E-86   | yes                      | yes                      | extr 20, nucl 4, mito 2, cyto_nucl 2            | 0                              | 0                              | 128    | 6             |            |                 |             | no      |                              | Apoplastic     | 0.79                    |
| Vna1.324 | hypothetical protein S7711_08134 [Stachybotrys chartarum IBT 7711]                             | 61.33    | 0       | yes                      | yes                      | extr 24, cyto 1.5, cyto_nucl 1.5                | 0                              | 0                              | 819    | 5             |            |                 |             | no      |                              | Apoplastic     | 0.58                    |
| Vna1.340 | beta-fructofuranosidase [Verticillium dahliae VdLs.17] EGY22354                                | 97.79    | 0       | yes                      | yes                      | extr 24, mito 2                                 | 0                              | 0                              | 680    | 4             |            |                 |             | no      |                              | Apoplastic     | 0.63                    |
| Vna1.342 | predicted protein VDBG_02882 [Verticillium alfalfae VaMs.102]                                  | 85.51    | 0       | yes                      | yes                      | extr 25                                         | 0                              | 0                              | 868    | 24            | -1.88      | 9.32E-07        | 2.17E-05    | no      |                              | Non-apoplastic | 0.54                    |
| Vna1.348 | conserved hypothetical protein VDBG_02889 [Verticillium alfalfae VaMs.102]                     | 100      | 1E-106  | yes                      | yes                      | extr 25                                         | 0                              | 0                              | 163    | 18            |            |                 |             | no      |                              | Apoplastic     | 0.67                    |
| Vna1.353 | predicted protein VDBG_02893 [Verticillium alfalfae VaMs.102]                                  | 96.34    | 9E-129  | yes                      | yes                      | cyto 15.5, cyto_nucl 11.333, cyto_mito 9.166    | 0                              | 0                              | 191    | 1             |            |                 |             | no      |                              | Non-apoplastic | 0.95                    |
| Vna1.354 | aspartic proteinase [Verticillium dahliae VdLs.17] EGY22367                                    | 86.73    | 0       | yes                      | yes                      | extr 23, mito 2                                 | 1                              | 1                              | 599    | 7             |            |                 |             | no      |                              | Non-apoplastic | 0.78                    |
| Vna1.357 | hypothetical protein BN1708_013018 [Verticillium longisporum]                                  | 87.46    | 1E-169  | yes                      | yes                      | extr 24, mito 1, golg 1, vacu 1                 | 0                              | 0                              | 291    | 0             | 1.57       | 6.17E-10        | 2.52E-08    | no      |                              | Non-apoplastic | 0.5                     |
| Vna1.358 | hypothetical protein BN1723_013383, partial [Verticillium longisporum]                         | 67.58    | 2E-147  | yes                      | yes                      | extr 25                                         | 0                              | 0                              | 355    | 12            |            |                 |             | no      |                              | Apoplastic     | 0.8                     |
| Vna1.365 | hypothetical protein BN1708_013026 [Verticillium longisporum]                                  | 99.38    | 2E-110  | yes                      | yes                      | mito 10, cyto 6.5, pero 5, extr 4, cyto_nucl 4  | 0                              | 0                              | 437    | 8             |            |                 |             | no      |                              | Non-apoplastic | 1                       |
| Vna1.370 | hypothetical protein VDAG_03821 [Verticillium dahliae VdLs.17]                                 | 61.3     | 0       | yes                      | yes                      | extr 16, mito 9                                 | 0                              | 0                              | 658    | 7             |            |                 |             | no      |                              | Non-apoplastic | 0.59                    |
| Vna1.385 | hypothetical protein BN1723_007037, partial [Verticillium longisporum]                         | 59.91    | 0       | yes                      | yes                      | extr 25                                         | 0                              | 0                              | 444    | 6             |            |                 |             | no      |                              | Apoplastic     | 0.78                    |
| Vna1.393 | hypothetical protein BN1708_006838 [Verticillium longisporum]                                  | 88.5     | 0       | yes                      | yes                      | cyto 9, extr 8, cyto_nucl 6, mito 4, cysk 4     | 0                              | 0                              | 681    | 12            |            |                 |             | no      |                              | Non-apoplastic | 0.93                    |
| Vna1.400 | conserved hypothetical protein VDBG_02946 [Verticillium alfalfae VaMs.102]                     | 96.47    | 0       | yes                      | yes                      | mito 20.5, cyto_mito 12, extr 3                 | 0                              | 0                              | 533    | 8             |            |                 |             | no      |                              | Non-apoplastic | 1                       |
| Vna1.428 | hypothetical protein VDAG_03883 [Verticillium dahliae VdLs.17]                                 | 98.88    | 0       | yes                      | yes                      | extr 24, cyto 2                                 | 0                              | 0                              | 361    | 9             |            |                 |             | no      |                              | Apoplastic     | 0.89                    |
| Vna1.430 | hypothetical protein BN1708_009010 [Verticillium longisporum]                                  | 95.02    | 0       | yes                      | yes                      | extr 21, mito 5                                 | 0                              | 0                              | 502    | 6             |            |                 |             | no      |                              | Non-apoplastic | 0.57                    |

|                  |                                                                                                |       |        |     |     |                                                 |   |   |      |    |        |          |          |     |                              |               |      |
|------------------|------------------------------------------------------------------------------------------------|-------|--------|-----|-----|-------------------------------------------------|---|---|------|----|--------|----------|----------|-----|------------------------------|---------------|------|
| <b>Vna1.431</b>  | conserved hypothetical protein VDBG_02979 [Verticillium alfalfae VaMs.102]                     | 99.32 | 0      | yes | yes | extr 23, mito 2                                 | 0 | 0 | 295  | 8  |        |          |          | yes |                              | Apoplatic     | 0.68 |
| <b>Vna1.438</b>  | hypothetical protein BN1708_009002 [Verticillium longisporum]                                  | 93.97 | 0      | yes | yes | extr 27                                         | 0 | 0 | 1700 | 48 |        |          |          | no  |                              | Apoplatic     | 0.93 |
| <b>Vna1.441</b>  | cellobiose dehydrogenase VDBG_02986 [Verticillium alfalfae VaMs.102]                           | 98.33 | 0      | yes | yes | extr 22, cyto 5                                 | 0 | 0 | 538  | 3  | 1.72   | 7.22E-14 | 4.58E-12 |     |                              | Apoplatic     | 0.78 |
| <b>Vna1.449</b>  | hypothetical protein BN1708_008993, partial [Verticillium longisporum]                         | 83.46 | 0      | yes | 0   | extr 27                                         | 0 | 0 | 929  | 8  |        |          |          | no  |                              | Apoplatic     | 0.72 |
| <b>Vna1.451</b>  | aminopeptidase Y [Verticillium dahliae VdLs.17] EGY22469                                       | 69.54 | 0      | yes | yes | extr 19, cyto 4.5, cyto_nucl 3, mito 1, pero 1  | 0 | 0 | 497  | 6  |        |          |          | no  |                              | Non-apoplatic | 0.7  |
| <b>Vna1.493</b>  | choline dehydrogenase [Verticillium dahliae VdLs.17] EGY22516                                  | 94.77 | 0      | yes | yes | extr 24, mito 3                                 | 0 | 0 | 609  | 3  |        |          |          | no  |                              | Apoplatic     | 0.55 |
| <b>Vna1.504</b>  | predicted protein VDBG_03056 [Verticillium alfalfae VaMs.102]                                  | 98.37 | 0      | yes | 0   | extr 12, mito 9, cyto 5, mito_nucl 5            | 0 | 0 | 429  | 0  |        |          |          | no  |                              | Apoplatic     | 0.66 |
| <b>Vna1.513</b>  | beta-glucosidase VDBG_03067 [Verticillium alfalfae VaMs.102]                                   | 98.88 | 0      | yes | yes | extr 19, mito 4, cyto 2, pero 2, mito_nucl 2, c | 0 | 0 | 804  | 7  |        |          |          | no  |                              | Apoplatic     | 0.67 |
| <b>Vna1.527</b>  | predicted protein VDBG_03083 [Verticillium alfalfae VaMs.102]                                  | 98.87 | 6E-106 | yes | yes | extr 26                                         | 0 | 0 | 301  | 19 |        |          |          | no  |                              | Apoplatic     | 0.88 |
| <b>Vna1.542</b>  | hypothetical protein BN1723_006541 [Verticillium longisporum]                                  | 97.08 | 1E-80  | yes | 0   | extr 23, mito 1, pero 1, golg 1, vacu 1         | 0 | 0 | 178  | 4  |        |          |          | no  |                              | Non-apoplatic | 0.67 |
| <b>Vna1.543</b>  | hypothetical protein BN1708_000357 [Verticillium longisporum]                                  | 50.17 | 7E-74  | yes | yes | extr 26                                         | 1 | 1 | 285  | 9  | -3.59  | 6.36E-07 | 1.54E-05 | no  |                              | Apoplatic     | 0.59 |
| <b>Vna1.552</b>  | endoglucanase-1 VDBG_03110 [Verticillium alfalfae VaMs.102]                                    | 100   | 2E-169 | yes | yes | extr 27                                         | 0 | 0 | 242  | 2  |        |          |          | yes | Chloroplast (0.992   86-107) | Apoplatic     | 0.8  |
| <b>Vna1.554</b>  | secretory phospholipase A2 VDBG_03112 [Verticillium alfalfae VaMs.102]                         | 99.47 | 3E-135 | yes | 0   | extr 25                                         | 0 | 0 | 187  | 4  |        |          |          | no  | Chloroplast (0.995   29-58)  | Non-apoplatic | 0.66 |
| <b>Vna1.557</b>  | endoglucanase-6B [Verticillium dahliae VdLs.17] EGY22584                                       | 91.52 | 0      | yes | yes | extr 20, mito 5                                 | 0 | 0 | 389  | 4  |        |          |          | no  |                              | Non-apoplatic | 0.78 |
| <b>Vna1.561</b>  | hypothetical protein BN1723_006570, partial [Verticillium longisporum]                         | 98.31 | 4E-121 | yes | yes | extr 20, mito 5                                 | 0 | 0 | 181  | 1  |        |          |          | no  |                              | Non-apoplatic | 0.56 |
| <b>Vna1.565</b>  | conserved hypothetical protein VDBG_03124 [Verticillium alfalfae VaMs.102]                     | 100   | 3E-81  | yes | 1   | extr 23, mito 2                                 | 0 | 0 | 117  | 8  |        |          |          | no  |                              | Apoplatic     | 0.77 |
| <b>Vna1.566</b>  | conserved hypothetical protein VDBG_03125 [Verticillium alfalfae VaMs.102]                     | 99.62 | 0      | yes | yes | extr 15, cyto 7, mito 4, cyto_nucl 4            | 0 | 0 | 261  | 4  | -13.59 | 1.03E-25 | 9.56E-24 | no  |                              | Non-apoplatic | 0.53 |
| <b>Vna1.570</b>  | secreted protein VDBG_03130 [Verticillium alfalfae VaMs.102]                                   | 99.53 | 6E-147 | yes | yes | extr 22, plas 3                                 | 1 | 0 | 211  | 4  | -14.07 | 5.62E-48 | 6.35E-46 | no  |                              | Apoplatic     | 0.6  |
| <b>Vna1.571</b>  | extracellular cell wall glucanase CrfI [Verticillium dahliae VdLs.17] EGY22597                 | 85.44 | 0      | yes | 0   | extr 24, golg 2                                 | 0 | 0 | 418  | 3  |        |          |          | no  |                              | Apoplatic     | 0.72 |
| <b>Vna1.575</b>  | hypothetical protein VDAG_02042 [Verticillium dahliae VdLs.17]                                 | 98.63 | 1E-154 | yes | yes | extr 25                                         | 0 | 0 | 222  | 8  |        |          |          | no  |                              | Apoplatic     | 0.84 |
| <b>Vna1.576</b>  | hypothetical protein BN1708_009998 [Verticillium longisporum]                                  | 93.33 | 0      | yes | yes | extr 27                                         | 0 | 0 | 284  | 7  |        |          |          | no  |                              | Apoplatic     | 0.7  |
| <b>Vna1.577</b>  | hypothetical protein BN1708_010056 [Verticillium longisporum]                                  | 64.35 | 9E-28  | yes | 0   | extr 24, nucl 1, mito 1, E.R. 1, mito_nucl 1    | 0 | 0 | 144  | 2  |        |          |          | no  |                              | Apoplatic     | 0.63 |
| <b>Vna1.584</b>  | hypothetical protein VDAG_02067 [Verticillium dahliae VdLs.17]                                 | 89.2  | 2E-82  | yes | yes | extr 25                                         | 0 | 0 | 210  | 6  |        |          |          | no  |                              | Apoplatic     | 0.55 |
| <b>Vna1.597</b>  | hypothetical protein BN1708_010039 [Verticillium longisporum]                                  | 60.93 | 1E-124 | yes | yes | extr 21, plas 2, E.R. 2                         | 0 | 0 | 286  | 4  |        |          |          | no  |                              | Apoplatic     | 0.58 |
| <b>Vna1.598</b>  | hydrolase [Verticillium dahliae VdLs.17] EGY20067                                              | 99.63 | 0      | yes | yes | extr 24, mito 2                                 | 0 | 0 | 352  | 9  |        |          |          | no  |                              | Apoplatic     | 0.68 |
| <b>Vna1.600</b>  | mannan endo-1,4-beta-mannosidase VDBG_03176 [Verticillium alfalfae VaMs.102]                   | 99.77 | 0      | yes | yes | extr 23, cyto 2                                 | 0 | 0 | 442  | 2  |        |          |          | no  |                              | Non-apoplatic | 0.72 |
| <b>Vna1.605</b>  | hypothetical protein BN1708_015527 [Verticillium longisporum]                                  | 100   | 0      | yes | 0   | extr 24, mito 2                                 | 0 | 0 | 525  | 24 |        |          |          | no  |                              | Apoplatic     | 0.8  |
| <b>Vna1.606</b>  | cellulosome enzyme [Verticillium dahliae VdLs.17] EGY20076                                     | 92.19 | 0      | yes | yes | extr 20, cyto_mito 3, mito 2.5, cyto 2.5        | 0 | 0 | 474  | 7  |        |          |          | no  |                              | Non-apoplatic | 0.65 |
| <b>Vna1.609</b>  | hypothetical protein BN1723_005283 [Verticillium longisporum]                                  | 89.05 | 8E-149 | yes | yes | extr 20, mito 3, cyto 3, cyto_mito 3            | 0 | 0 | 244  | 4  |        |          |          | no  |                              | Apoplatic     | 0.76 |
| <b>Vna1.614</b>  | CAS1 VDBG_03193 [Verticillium alfalfae VaMs.102]                                               | 99.57 | 1E-165 | yes | 0   | extr 25                                         | 0 | 0 | 230  | 4  |        |          |          | no  |                              | Apoplatic     | 0.65 |
| <b>Vna1.617</b>  | predicted protein VDBG_03197 [Verticillium alfalfae VaMs.102]                                  | 100   | 2E-97  | yes | yes | extr 16, mito 5, cyto 5, cyto_nucl 4            | 0 | 0 | 144  | 4  |        |          |          | no  |                              | Non-apoplatic | 0.7  |
| <b>Vna1.618</b>  | hypothetical protein BN1708_013495 [Verticillium longisporum]                                  | 89.94 | 3E-82  | yes | yes | extr 17, E.R. 4, golg 3, mito 1, cyto 1, vacu 1 | 0 | 0 | 161  | 6  |        |          |          | no  |                              | Apoplatic     | 0.55 |
| <b>Vna1.620</b>  | conserved hypothetical protein VDBG_03203 [Verticillium alfalfae VaMs.102]                     | 99.17 | 0      | yes | yes | extr 25                                         | 1 | 1 | 483  | 6  |        |          |          | no  |                              | Apoplatic     | 0.62 |
| <b>Vna1.621</b>  | conserved hypothetical protein VDBG_03204 [Verticillium alfalfae VaMs.102]                     | 97.33 | 0      | yes | yes | extr 26                                         | 1 | 1 | 358  | 3  |        |          |          | no  |                              | Non-apoplatic | 0.54 |
| <b>Vna1.634</b>  | conserved hypothetical protein VDBG_03219 [Verticillium alfalfae VaMs.102]                     | 98.52 | 0      | yes | yes | extr 20, E.R. 5                                 | 0 | 1 | 337  | 3  |        |          |          | no  |                              | Apoplatic     | 0.61 |
| <b>Vna1.636</b>  | hypothetical protein BN1708_008376, partial [Verticillium longisporum]                         | 88.43 | 0      | yes | 0   | extr 27                                         | 0 | 0 | 535  | 3  |        |          |          | no  | Chloroplast (0.985   61-81)  | Apoplatic     | 0.77 |
| <b>Vna1.638</b>  | predicted protein VDBG_03224 [Verticillium alfalfae VaMs.102]                                  | 94.87 | 0      | yes | yes | extr 20, plas 3, mito 2                         | 0 | 0 | 1018 | 24 |        |          |          | no  |                              | Apoplatic     | 0.89 |
| <b>Vna1.649</b>  | hypothetical protein BN1708_001979 [Verticillium longisporum]                                  | 95.16 | 0      | yes | yes | mito 19, cyto 5, extr 2                         | 0 | 0 | 577  | 10 |        |          |          | no  |                              | Non-apoplatic | 0.84 |
| <b>Vna1.719</b>  | endoglucanase-4 VDBG_03308 [Verticillium alfalfae VaMs.102]                                    | 97    | 0      | yes | yes | extr 14, cyto 8, mito 5                         | 0 | 0 | 299  | 5  |        |          |          | no  |                              | Non-apoplatic | 0.71 |
| <b>Vna1.736</b>  | predicted protein VDBG_03327 [Verticillium alfalfae VaMs.102]                                  | 100   | 5E-118 | yes | yes | extr 20, mito 5                                 | 0 | 0 | 164  | 4  |        |          |          | no  |                              | Non-apoplatic | 0.52 |
| <b>Vna1.737</b>  | feruloyl esterase B VDBG_03328 [Verticillium alfalfae VaMs.102]                                | 98.37 | 0      | yes | yes | extr 19, mito 4, cyto 2, pero 2, mito_nucl 2, c | 0 | 0 | 491  | 10 |        |          |          | no  |                              | Non-apoplatic | 0.8  |
| <b>Vna1.739</b>  | acetylcholinesterase [Verticillium dahliae VdLs.17] EGY20217                                   | 71.14 | 0      | yes | 0   | extr 20, mito 5                                 | 0 | 0 | 525  | 8  |        |          |          | yes |                              | Non-apoplatic | 0.5  |
| <b>Vna1.747</b>  | hypothetical protein BN1723_013022 [Verticillium longisporum]                                  | 95.61 | 0      | yes | yes | extr 24, E.R. 2                                 | 0 | 1 | 463  | 8  |        |          |          | no  |                              | Apoplatic     | 0.59 |
| <b>Vna1.837</b>  | conserved hypothetical protein VDBG_06992 [Verticillium alfalfae VaMs.102]                     | 99.65 | 0      | yes | yes | extr 25                                         | 0 | 0 | 286  | 3  |        |          |          | no  |                              | Apoplatic     | 0.78 |
| <b>Vna1.875</b>  | fungai cellulose binding domain-containing protein VDBG_07034 [Verticillium alfalfae VaMs.102] | 98.71 | 7E-168 | yes | 0   | extr 26                                         | 0 | 0 | 236  | 4  |        |          |          | no  |                              | Apoplatic     | 0.71 |
| <b>Vna1.913</b>  | hypothetical protein BN1723_001360 [Verticillium longisporum]                                  | 91.01 | 2E-86  | yes | yes | extr 25                                         | 1 | 1 | 307  | 14 |        |          |          | no  |                              | Apoplatic     | 0.64 |
| <b>Vna1.916</b>  | predicted protein VDBG_07084 [Verticillium alfalfae VaMs.102]                                  | 93.44 | 0      | yes | yes | extr 13, plas 10, E.R. 2                        | 0 | 0 | 807  | 17 |        |          |          | no  |                              | Non-apoplatic | 0.95 |
| <b>Vna1.960</b>  | RING-7 protein VDBG_07135 [Verticillium alfalfae VaMs.102]                                     | 99.13 | 0      | yes | yes | plas 12, extr 7, cyto 4, E.R. 2, cyto_mito 2, c | 1 | 1 | 499  | 9  |        |          |          | no  |                              | Non-apoplatic | 0.89 |
| <b>Vna1.962</b>  | conserved hypothetical protein VDBG_07137 [Verticillium alfalfae VaMs.102]                     | 99.46 | 0      | yes | yes | extr 20, cyto 4, mito 2, cyto_nucl 2, cyto_per  | 0 | 0 | 371  | 8  |        |          |          | yes |                              | Non-apoplatic | 0.51 |
| <b>Vna1.970</b>  | conserved hypothetical protein VDBG_07149 [Verticillium alfalfae VaMs.102]                     | 99.48 | 1E-128 | yes | yes | extr 19, mito 6                                 | 0 | 0 | 191  | 0  |        |          |          | no  |                              | Apoplatic     | 0.62 |
| <b>Vna1.979</b>  | hypothetical protein BN1708_012330 [Verticillium longisporum]                                  | 69.31 | 0      | yes | 0   | extr 22, mito 2, pero 2                         | 0 | 0 | 700  | 2  |        |          |          | no  |                              | Non-apoplatic | 0.73 |
| <b>Vna1.996</b>  | hypothetical protein BN1708_012891 [Verticillium longisporum]                                  | 78.13 | 0      | yes | yes | extr 26                                         | 0 | 0 | 673  | 9  |        |          |          | no  |                              | Apoplatic     | 0.64 |
| <b>Vna1.1007</b> | hypothetical protein BN1723_008029 [Verticillium longisporum]                                  | 93.37 | 2E-116 | yes | yes | extr 20, cyto 3, mito 2, cyto_per 2             | 1 | 1 | 386  | 2  |        |          |          | no  |                              | Non-apoplatic | 0.68 |
| <b>Vna1.1013</b> | hypothetical protein BN1723_005744 [Verticillium longisporum]                                  | 64.25 | 2E-76  | yes | yes | extr 25                                         | 0 | 0 | 196  | 7  |        |          |          | no  |                              | Non-apoplatic | 0.54 |
| <b>Vna1.1037</b> | hypothetical protein BN1708_001542 [Verticillium longisporum]                                  | 94.96 | 0      | yes | yes | extr 23, cyto 1.5, cyto_nucl 1.5                | 0 | 0 | 536  | 2  |        |          |          | no  |                              | Non-apoplatic | 0.62 |
| <b>Vna1.1069</b> | alkaline proteinase VDBG_07258 [Verticillium alfalfae VaMs.102]                                | 100   | 0      | yes | yes | extr 27                                         | 0 | 0 | 406  | 0  |        |          |          | no  |                              | Apoplatic     | 0.63 |
| <b>Vna1.1072</b> | hypothetical protein VDAG_05970 [Verticillium dahliae VdLs.17]                                 | 91.71 | 8E-113 | yes | yes | extr 25                                         | 0 | 0 | 238  | 4  |        |          |          | no  |                              | Apoplatic     | 0.81 |
| <b>Vna1.1078</b> | alpha-amylase A type-3 VDBG_07267 [Verticillium alfalfae VaMs.102]                             | 99.78 | 0      | yes | yes | extr 26                                         | 0 | 0 | 462  | 6  | 2.31   | 4.44E-16 | 3.49E-14 | yes |                              | Apoplatic     | 0.84 |
| <b>Vna1.1080</b> | hypothetical protein BN1708_009895 [Verticillium longisporum]                                  | 92.6  | 0      | yes | 0   | extr 23, mito 1, cyto 1, E.R. 1, golg 1, cyto_r | 0 | 0 | 608  | 3  |        |          |          | no  |                              | Non-apoplatic | 0.65 |
| <b>Vna1.1084</b> | conserved hypothetical protein VDBG_07273 [Verticillium alfalfae VaMs.102]                     | 98.64 | 5E-148 | yes | yes | extr 26                                         | 0 | 0 | 220  | 2  |        |          |          | no  |                              | Apoplatic     | 0.74 |
| <b>Vna1.1088</b> | hypothetical protein BN1723_015431, partial [Verticillium longisporum]                         | 66.05 | 1E-129 | yes | yes | extr 16, cyto 6, mito 3, cyto_nucl 3            | 0 | 0 | 380  | 5  |        |          |          | no  |                              | Non-apoplatic | 0.61 |
| <b>Vna1.1093</b> | hypothetical protein BN1723_013901, partial [Verticillium longisporum]                         | 95.54 | 0      | yes | yes | extr 27                                         | 0 | 0 | 458  | 13 |        |          |          | no  |                              | Apoplatic     | 0.68 |

|                  |                                                                                             |       |        |     |     |                                                 |   |   |      |    |        |          |          |                              |               |      |
|------------------|---------------------------------------------------------------------------------------------|-------|--------|-----|-----|-------------------------------------------------|---|---|------|----|--------|----------|----------|------------------------------|---------------|------|
| <i>Vna1.1097</i> | FAD binding domain-containing protein VDBG_07289 [Verticillium alfalfae VaMs.102]           | 99.79 | 0      | yes | yes | extr 27                                         | 0 | 0 | 691  | 9  |        |          | no       | Chloroplast (0.959   47-70)  | Apoplatic     | 0.81 |
| <i>Vna1.1110</i> | hypothetical protein BNI708_014684 [Verticillium longisporum]                               | 70.23 | 0      | yes | yes | extr 27                                         | 0 | 0 | 435  | 1  |        |          | no       |                              | Apoplatic     | 0.73 |
| <i>Vna1.1124</i> | rdsl [Verticillium dahliae VdLs.17] EGY15174                                                | 77.71 | 0      | yes | yes | extr 23, mito 3                                 | 0 | 0 | 465  | 4  |        |          | no       |                              | Non-apoplatic | 0.5  |
| <i>Vna1.1125</i> | conserved hypothetical protein VDBG_07324 [Verticillium alfalfae VaMs.102]                  | 95.56 | 0      | yes | yes | extr 20, mito 3, cyto 2.5, cyto_nucl 2          | 0 | 0 | 482  | 1  |        |          | no       |                              | Non-apoplatic | 0.65 |
| <i>Vna1.1133</i> | hypothetical protein UCDDA912_g06032 [Diaporthe ampelina]                                   | 98.82 | 8E-87  | yes | yes | extr 26                                         | 0 | 0 | 364  | 7  |        |          | no       |                              | Apoplatic     | 0.84 |
| <i>Vna1.1146</i> | hypothetical protein BNI723_000705 [Verticillium longisporum]                               | 85.28 | 0      | yes | yes | extr 16, mito 5, cyto 5, cyto_mito 5            | 0 | 0 | 1121 | 9  |        |          | no       |                              | Non-apoplatic | 0.8  |
| <i>Vna1.1172</i> | endoplasmic reticulum mannosyl-oligosaccharide 1,2-alpha-mannosidase [Verticillium dahliae] | 69.78 | 0      | yes | yes | extr 16, mito 6, cyto 2, pero 2, cyto_pero 2    | 0 | 0 | 1100 | 9  |        |          | no       |                              | Non-apoplatic | 0.9  |
| <i>Vna1.1175</i> | predicted protein VDBG_07380 [Verticillium alfalfae VaMs.102]                               | 95.91 | 4E-146 | yes | yes | extr 25                                         | 0 | 0 | 222  | 13 |        |          | no       |                              | Apoplatic     | 0.89 |
| <i>Vna1.1196</i> | predicted protein VDBG_07401 [Verticillium alfalfae VaMs.102]                               | 91.46 | 3E-91  | yes | yes | extr 26                                         | 0 | 0 | 193  | 2  | -8.25  | 2.34E-53 | 2.68E-51 |                              | Apoplatic     | 0.61 |
| <i>Vna1.1210</i> | hypothetical protein BNI708_013148, partial [Verticillium longisporum]                      | 96.77 | 0      | yes | yes | extr 27                                         | 0 | 0 | 496  | 10 |        |          | no       | Chloroplast (0.979   68-95)  | Apoplatic     | 0.6  |
| <i>Vna1.1218</i> | amine oxidase [Verticillium dahliae VdLs.17] EGY15279                                       | 79.69 | 0      | yes | yes | extr 25, cyto 1.5, cyto_nucl 1.5                | 0 | 0 | 453  | 2  |        |          | no       |                              | Non-apoplatic | 0.5  |
| <i>Vna1.1223</i> | 6-hydroxy-D-nicotine oxidase VDBG_09854 [Verticillium alfalfae VaMs.102]                    | 98.78 | 0      | yes | yes | extr 22, cyto 2, pero 2, cyto_pero 2            | 0 | 0 | 500  | 4  | -3.48  | 2.53E-14 | 1.70E-12 | Chloroplast (0.978   65-91)  | Non-apoplatic | 0.59 |
| <i>Vna1.1229</i> | hypothetical protein BNI708_012380 [Verticillium longisporum]                               | 100   | 5E-83  | yes | yes | extr 27                                         | 0 | 0 | 191  | 9  |        |          | no       | Chloroplast (0.794   77-100) | Apoplatic     | 0.59 |
| <i>Vna1.1231</i> | predicted protein VDBG_09862 [Verticillium alfalfae VaMs.102]                               | 100   | 0      | yes | yes | cyto 10.5, extr 9, cyto_nucl 6, mito 3, vacu 2  | 0 | 0 | 328  | 6  | 2.45   | 2.73E-14 | 1.80E-12 | no                           | Non-apoplatic | 0.77 |
| <i>Vna1.1232</i> | hypothetical protein VDAG_06147 [Verticillium dahliae VdLs.17]                              | 99.12 | 6E-75  | yes | yes | extr 22, E.R. 4                                 | 0 | 0 | 113  | 5  |        |          | no       |                              | Apoplatic     | 0.61 |
| <i>Vna1.1233</i> | hypothetical protein VDAG_06148 [Verticillium dahliae VdLs.17]                              | 97.99 | 0      | yes | yes | cyto 8, nucl 5, E.R. 5, mito 3, extr 3, vacu 3  | 0 | 0 | 349  | 11 |        |          | no       |                              | Non-apoplatic | 0.97 |
| <i>Vna1.1237</i> | conserved hypothetical protein VDBG_09868 [Verticillium alfalfae VaMs.102]                  | 99.32 | 0      | yes | yes | extr 7, mito 5, E.R. 5, plas 3, golg 3, cyto 2  | 0 | 0 | 294  | 1  |        |          | no       |                              | Non-apoplatic | 0.75 |
| <i>Vna1.1239</i> | pectate lyase VDBG_09871 [Verticillium alfalfae VaMs.102]                                   | 100   | 0      | yes | yes | extr 26                                         | 0 | 0 | 255  | 10 | 1.48   | 1.44E-11 | 7.19E-10 |                              | Apoplatic     | 0.9  |
| <i>Vna1.1245</i> | conserved hypothetical protein VDBG_09877 [Verticillium alfalfae VaMs.102]                  | 99.44 | 0      | yes | yes | extr 20, nucl 2, cyto 2, cyto_nucl 2            | 0 | 0 | 540  | 1  |        |          | no       |                              | Non-apoplatic | 0.57 |
| <i>Vna1.1248</i> | hypothetical protein BNI708_002167 [Verticillium longisporum]                               | 62.54 | 4E-121 | yes | yes | extr 27                                         | 0 | 0 | 288  | 7  | -4.45  | 1.47E-07 | 4.02E-06 | no                           | Apoplatic     | 0.82 |
| <i>Vna1.1249</i> | acetyl xylan esterase [Verticillium dahliae VdLs.17] EGY15312                               | 87.67 | 0      | yes | yes | extr 23, mito 3                                 | 0 | 0 | 365  | 11 |        |          | no       |                              | Apoplatic     | 0.76 |
| <i>Vna1.1255</i> | hypothetical protein BNI708_001030 [Verticillium longisporum]                               | 80.6  | 0      | yes | yes | extr 21, mito 2, pero 2, cyto 1.5, cyto_nucl 1  | 0 | 0 | 562  | 5  |        |          | no       | Mitochondria (0.842   64-84) | Non-apoplatic | 0.54 |
| <i>Vna1.1265</i> | hypothetical protein BNI708_002147, partial [Verticillium longisporum]                      | 93.56 | 0      | yes | yes | extr 12, cyto 5.5, mito 5, cyto_nucl 4, E.R. 2  | 1 | 1 | 383  | 10 |        |          | no       |                              | Non-apoplatic | 0.8  |
| <i>Vna1.1274</i> | SnodProt1 VDBG_09911 [Verticillium alfalfae VaMs.102]                                       | 100   | 4E-95  | yes | yes | extr 25                                         | 0 | 0 | 138  | 4  |        |          | no       |                              | Apoplatic     | 0.91 |
| <i>Vna1.1277</i> | versatile peroxidase VPL1 VDBG_09914 [Verticillium alfalfae VaMs.102]                       | 92.46 | 0      | yes | yes | extr 20, mito 2, vacu 2, nucl 1, cyto 1, cyto p | 0 | 0 | 354  | 8  |        |          | no       |                              | Non-apoplatic | 0.68 |
| <i>Vna1.1278</i> | hypothetical protein BNI723_015641 [Verticillium longisporum]                               | 93.67 | 0      | yes | yes | extr 27                                         | 0 | 0 | 866  | 5  |        |          | no       |                              | Apoplatic     | 0.65 |
| <i>Vna1.1280</i> | conserved hypothetical protein VDBG_09920 [Verticillium alfalfae VaMs.102]                  | 98.6  | 0      | yes | yes | extr 23, mito 2                                 | 0 | 1 | 1142 | 3  |        |          | no       |                              | Non-apoplatic | 0.56 |
| <i>Vna1.1282</i> | hypothetical protein BNI708_012767, partial [Verticillium longisporum]                      | 85.62 | 8E-175 | yes | yes | extr 22, E.R. 3                                 | 0 | 0 | 292  | 2  |        |          | no       |                              | Non-apoplatic | 0.58 |
| <i>Vna1.1288</i> | predicted protein VDBG_09929 [Verticillium alfalfae VaMs.102]                               | 92.08 | 4E-63  | yes | yes | extr 18, mito 6, pero 2                         | 0 | 0 | 101  | 6  |        |          | no       |                              | Non-apoplatic | 0.58 |
| <i>Vna1.1302</i> | hypothetical protein BNI708_013178 [Verticillium longisporum]                               | 93.79 | 8E-115 | yes | yes | cyto 8, cyto_nucl 8, mito 7, extr 6, nucl 4     | 0 | 0 | 177  | 2  |        |          | no       |                              | Apoplatic     | 0.57 |
| <i>Vna1.1313</i> | exoglucanase-6A VDBG_09958 [Verticillium alfalfae VaMs.102]                                 | 99.24 | 0      | yes | yes | extr 22, mito 2, vacu 2                         | 0 | 0 | 393  | 5  |        |          | no       |                              | Non-apoplatic | 0.62 |
| <i>Vna1.1315</i> | hypothetical protein BNI708_005957 [Verticillium longisporum]                               | 82.51 | 0      | yes | yes | extr 26                                         | 0 | 0 | 366  | 18 |        |          | no       |                              | Apoplatic     | 0.89 |
| <i>Vna1.1318</i> | conserved hypothetical protein VDBG_09964 [Verticillium alfalfae VaMs.102]                  | 98.71 | 5E-168 | yes | yes | extr 12, cyto 8, mito 7                         | 0 | 0 | 232  | 5  | 1.51   | 2.51E-07 | 6.60E-06 | yes                          | Non-apoplatic | 0.57 |
| <i>Vna1.1334</i> | predicted protein VDBG_09984 [Verticillium alfalfae VaMs.102]                               | 98    | 1E-30  | yes | yes | extr 26                                         | 0 | 0 | 421  | 1  |        |          | no       |                              | Apoplatic     | 0.79 |
| <i>Vna1.1337</i> | carboxylesterase VDBG_09990 [Verticillium alfalfae VaMs.102]                                | 99.44 | 0      | yes | yes | extr 24, mito 2                                 | 0 | 0 | 534  | 8  |        |          | no       |                              | Non-apoplatic | 0.62 |
| <i>Vna1.1338</i> | hypothetical protein BNI708_005931, partial [Verticillium longisporum]                      | 60.49 | 2E-145 | yes | yes | extr 25                                         | 0 | 0 | 336  | 3  |        |          | no       |                              | Apoplatic     | 0.81 |
| <i>Vna2.8</i>    | hypothetical protein BNI708_006974 [Verticillium longisporum]                               | 69.3  | 1E-160 | yes | yes | extr 24, E.R. 2                                 | 0 | 0 | 355  | 9  |        |          | no       |                              | Non-apoplatic | 0.53 |
| <i>Vna2.21</i>   | carboxypeptidase KEX1 VDBG_00507 [Verticillium alfalfae VaMs.102]                           | 99.84 | 0      | yes | yes | extr 11, mito 5, cyto 4, E.R. 3, golg 2, cyto p | 1 | 1 | 635  | 7  |        |          | no       |                              | Non-apoplatic | 0.95 |
| <i>Vna2.30</i>   | guanyl-specific ribonuclease F1 VDBG_00498 [Verticillium alfalfae VaMs.102]                 | 95.05 | 3E-106 | yes | yes | extr 27                                         | 0 | 0 | 197  | 5  |        |          | no       |                              | Apoplatic     | 0.65 |
| <i>Vna2.47</i>   | hypothetical protein VDAG_00090 [Verticillium dahliae VdLs.17]                              | 87.71 | 0      | yes | yes | extr 23, mito 2, cyto 2, cyto_mito 2            | 0 | 0 | 662  | 8  |        |          | no       |                              | Apoplatic     | 0.69 |
| <i>Vna2.50</i>   | hypothetical protein VDAG_00087 [Verticillium dahliae VdLs.17]                              | 83.2  | 0      | yes | yes | extr 22, cyto 3.5, cyto_nucl 2.5                | 0 | 0 | 569  | 0  |        |          | no       |                              | Apoplatic     | 0.55 |
| <i>Vna2.60</i>   | hypothetical protein VDAG_00076 [Verticillium dahliae VdLs.17]                              | 95.96 | 9E-44  | yes | yes | extr 25                                         | 0 | 0 | 167  | 8  |        |          | no       |                              | Apoplatic     | 0.9  |
| <i>Vna2.67</i>   | hypothetical protein BNI708_013198 [Verticillium longisporum]                               | 80.82 | 0      | yes | yes | extr 27                                         | 0 | 0 | 1029 | 81 |        |          | no       |                              | Apoplatic     | 0.74 |
| <i>Vna2.72</i>   | hypothetical protein BNI723_003208 [Verticillium longisporum]                               | 77.72 | 7E-110 | yes | yes | extr 26                                         | 0 | 0 | 464  | 16 |        |          | no       |                              | Non-apoplatic | 0.54 |
| <i>Vna2.73</i>   | hypothetical protein BNI723_014932 [Verticillium longisporum]                               | 98.68 | 0      | yes | yes | plas 15, extr 9, nucl 2                         | 1 | 1 | 1016 | 1  |        |          | no       |                              | Non-apoplatic | 0.78 |
| <i>Vna2.89</i>   | pectate lyase [Verticillium dahliae VdLs.17] EGY18351                                       | 80.51 | 1E-161 | yes | yes | extr 22, mito 3, cyto 1.5, cyto_nucl 1.5        | 0 | 0 | 277  | 12 |        |          | yes      | Chloroplast (0.862   36-56)  | Apoplatic     | 0.88 |
| <i>Vna2.93</i>   | conserved hypothetical protein VDBG_00385 [Verticillium alfalfae VaMs.102]                  | 99.58 | 5E-168 | yes | yes | extr 27                                         | 0 | 0 | 240  | 9  |        |          | no       |                              | Apoplatic     | 0.93 |
| <i>Vna2.95</i>   | endoplasmic reticulum vesicle protein [Verticillium dahliae VdLs.17] EGY18344               | 99.54 | 3E-159 | yes | yes | mito 12, cyto 7, extr 5, pero 2                 | 1 | 1 | 219  | 3  |        |          | no       |                              | Non-apoplatic | 0.95 |
| <i>Vna2.98</i>   | hypothetical protein VDAG_08675 [Verticillium dahliae VdLs.17]                              | 49.56 | 1E-92  | yes | yes | extr 9, mito 5, pero 4, cyto_mito 4, cyto 3, E  | 0 | 0 | 330  | 0  |        |          | no       |                              | Non-apoplatic | 0.9  |
| <i>Vna2.100</i>  | hypothetical protein BNI723_004988 [Verticillium longisporum]                               | 76.21 | 1E-100 | yes | yes | extr 23, E.R. 3                                 | 0 | 1 | 447  | 26 |        |          | no       |                              | Apoplatic     | 0.58 |
| <i>Vna2.101</i>  | hypothetical protein BNI723_009365, partial [Verticillium longisporum]                      | 43.56 | 6E-17  | yes | yes | extr 21, golg 3, cyto 1, E.R. 1, vacu 1         | 0 | 0 | 140  | 8  |        |          | no       |                              | Non-apoplatic | 0.59 |
| <i>Vna2.118</i>  | hypothetical protein VDBG_00359 [Verticillium alfalfae VaMs.102]                            | 99.35 | 4E-98  | yes | yes | extr 20, vacu 4, cyto 1, plas 1, E.R. 1         | 0 | 0 | 153  | 5  |        |          | no       |                              | Apoplatic     | 0.78 |
| <i>Vna2.155</i>  | vacuolar protein sorting-associated protein VDBG_00317 [Verticillium alfalfae VaMs.102]     | 99.64 | 0      | yes | yes | extr 12, golg 6, mito 3, plas 3, vacu 2         | 0 | 1 | 548  | 7  |        |          | no       |                              | Non-apoplatic | 0.85 |
| <i>Vna2.175</i>  | predicted protein VDBG_00296 [Verticillium alfalfae VaMs.102]                               | 96.49 | 0      | yes | yes | extr 20, cyto 5                                 | 0 | 0 | 370  | 1  |        |          | no       |                              | Non-apoplatic | 0.5  |
| <i>Vna2.179</i>  | conserved hypothetical protein VDBG_00292 [Verticillium alfalfae VaMs.102]                  | 98.68 | 0      | yes | yes | extr 18, cyto 5, E.R. 3                         | 0 | 0 | 454  | 10 | -11.50 | 1.79E-74 | 2.18E-72 |                              | Non-apoplatic | 0.64 |
| <i>Vna2.185</i>  | hypothetical protein BNI708_004625 [Verticillium longisporum]                               | 42.33 | 9E-73  | yes | yes | extr 20, nucl 2, mito 2, plas 2, mito_nucl 2    | 1 | 1 | 419  | 25 | -1.88  | 8.41E-07 | 1.98E-05 | no                           | Apoplatic     | 0.76 |
| <i>Vna2.191</i>  | hypothetical protein BNI723_003651 [Verticillium longisporum]                               | 67.95 | 0      | yes | yes | extr 22, E.R. 2, vacu 2                         | 0 | 0 | 713  | 6  |        |          | no       |                              | Non-apoplatic | 0.6  |
| <i>Vna2.199</i>  | hypothetical protein VDAG_08558 [Verticillium dahliae VdLs.17]                              | 99.64 | 2E-159 | yes | yes | extr 12, plas 5, mito 4, E.R. 3, pero 2, mito g | 0 | 0 | 429  | 20 |        |          | no       |                              | Non-apoplatic | 0.6  |
| <i>Vna2.219</i>  | transmembrane emp24 domain-containing protein VDBG_00253 [Verticillium alfalfae VaMs.]      | 100   | 1E-160 | yes | yes | extr 17, cyto_nucl 5, nucl 4, cyto 4            | 0 | 1 | 219  | 3  |        |          | no       |                              | Non-apoplatic | 0.95 |
| <i>Vna2.227</i>  | hypothetical protein BNI708_010759 [Verticillium longisporum]                               | 57.47 | 6E-21  | yes | yes | extr 25                                         | 0 | 0 | 191  | 4  |        |          | no       |                              | Apoplatic     | 0.69 |
| <i>Vna2.228</i>  | hypothetical protein BNI708_010761, partial [Verticillium longisporum]                      | 65.05 | 2E-75  | yes | yes | extr 26                                         | 0 | 0 | 179  | 4  | -2.31  | 4.02E-14 | 2.61E-12 |                              | Apoplatic     | 0.85 |
| <i>Vna2.248</i>  | not available                                                                               | -     | -      | yes | yes | plas 14, mito 5, extr 4, E.R. 4                 | 0 | 0 | 74   | 4  | -4.12  | 1.46E-46 | 1.63E-44 | no                           | Non-apoplatic | 0.55 |

|           |                                                                                         |       |        |     |     |                                                 |   |   |      |    |        |          |          |     |                               |      |
|-----------|-----------------------------------------------------------------------------------------|-------|--------|-----|-----|-------------------------------------------------|---|---|------|----|--------|----------|----------|-----|-------------------------------|------|
| Vna2.250  | conserved hypothetical protein VDBG_00215 [Verticillium alfalfae VaMs.102]              | 99.33 | 0      | yes | yes | extr 19, mito 3, cyto 3, cyto_mito 3            | 0 | 0 | 450  | 10 |        |          |          | no  | Non-apoplastic                | 0.71 |
| Vna2.266  | hypothetical protein BN1708_009078 [Verticillium longisporum]                           | 90.69 | 0      | yes | yes | extr 12, mito 8, nucl 4, cyto 1, pero 1, golg 1 | 1 | 1 | 565  | 14 |        |          |          | no  | Non-apoplastic                | 0.93 |
| Vna2.267  | hypothetical protein BN1708_011537 [Verticillium longisporum]                           | 81.29 | 3E-170 | yes | yes | extr 17, cyto 3, mito 2, cyto_nucl 2, pero 2    | 0 | 0 | 294  | 8  |        |          |          | no  | Non-apoplastic                | 0.88 |
| Vna2.269  | hypothetical protein BN1708_009079 [Verticillium longisporum]                           | 84.45 | 0      | yes | yes | extr 14, mito 3, nucl 2, cyto 2, plas 2, cyto_n | 1 | 1 | 431  | 14 |        |          |          | no  | Non-apoplastic                | 0.7  |
| Vna2.271  | glycosyl hydrolase family 43 protein [Verticillium dahliae VdLs.17] EGY18143            | 91.09 | 2E-156 | yes | yes | extr 20, mito 5                                 | 0 | 0 | 337  | 7  | 1.57   | 6.58E-12 | 3.36E-10 | no  | Non-apoplastic                | 0.54 |
| Vna2.376  | ERP3 VDBG_00075 [Verticillium alfalfae VaMs.102]                                        | 99.52 | 1E-149 | yes | yes | extr 13, mito 4, cyto 4, E.R. 4, cyto_mito 4    | 1 | 1 | 210  | 5  |        |          |          | no  | Non-apoplastic                | 0.7  |
| Vna2.403  | signal sequence receptor alpha chain [Verticillium dahliae VdLs.17] EGY18001            | 99.62 | 0      | yes | yes | extr 12, E.R. 4, vacu 4, plas 3, mito 2, pero 2 | 1 | 1 | 260  | 0  |        |          |          | no  | Non-apoplastic                | 0.73 |
| Vna2.464  | FAD binding domain-containing protein [Verticillium dahliae VdLs.17] EGY17836           | 90.49 | 0      | yes | yes | extr 19, mito 6                                 | 0 | 0 | 513  | 7  |        |          |          | no  | Non-apoplastic                | 0.53 |
| Vna2.509  | nuclease P1 [Verticillium dahliae VdLs.17] EGY17783                                     | 81.37 | 7E-176 | yes | yes | extr 26                                         | 0 | 0 | 322  | 9  |        |          |          | no  | Apoplastic                    | 0.7  |
| Vna2.523  | hypothetical protein BN1708_011872 [Verticillium longisporum]                           | 97.49 | 0      | yes | yes | extr 16, mito 6, cyto 4                         | 0 | 0 | 1267 | 46 |        |          |          | no  | Apoplastic                    | 0.65 |
| Vna2.548  | conserved hypothetical protein VDBG_04194 [Verticillium alfalfae VaMs.102]              | 97.8  | 0      | yes | yes | extr 20, mito 5                                 | 1 | 1 | 273  | 4  |        |          |          | no  | Non-apoplastic                | 0.83 |
| Vna2.570  | calcium influx-promoting protein ehsl1 VDBG_04173 [Verticillium alfalfae VaMs.102]      | 99.36 | 0      | yes | yes | extr 17, cyto 4, pero 2, E.R. 2, golg 2, cyto_n | 0 | 1 | 625  | 14 |        |          |          | no  | Non-apoplastic                | 0.82 |
| Vna2.595  | hypothetical protein BN1723_007293, partial [Verticillium longisporum]                  | 50.89 | 8E-101 | yes | yes | extr 21, mito 4                                 | 1 | 1 | 397  | 1  |        |          |          | no  | Apoplastic                    | 0.72 |
| Vna2.599  | hypothetical protein VDAG_01316 [Verticillium dahliae VdLs.17]                          | 94.32 | 0      | yes | yes | extr 26                                         | 1 | 0 | 352  | 10 |        |          |          | no  | Apoplastic                    | 0.77 |
| Vna2.610  | hypothetical protein BN1708_006601 [Verticillium longisporum]                           | 94.6  | 0      | yes | yes | extr 20, mito 2, pero 2, vacu 2                 | 0 | 0 | 664  | 6  |        |          |          | no  | Non-apoplastic                | 0.63 |
| Vna2.617  | hypothetical protein BN1723_000249 [Verticillium longisporum]                           | 75.51 | 2E-97  | yes | yes | extr 25                                         | 0 | 0 | 196  | 8  |        |          |          | no  | Apoplastic                    | 0.57 |
| Vna2.618  | predicted protein VDBG_04066 [Verticillium alfalfae VaMs.102]                           | 98.29 | 2E-169 | yes | yes | mito 10, cyto 9, extr 5, cyto_pero 5            | 0 | 0 | 234  | 5  |        |          |          | no  | Non-apoplastic                | 0.6  |
| Vna2.644  | hypothetical protein BN1723_012152 [Verticillium longisporum]                           | 92.69 | 0      | yes | yes | extr 18, cyto 6, mito 3, cyto_nucl 3, cyto_per  | 0 | 0 | 342  | 8  |        |          |          | no  | Apoplastic                    | 0.64 |
| Vna2.646  | hypothetical protein BN1708_012220, partial [Verticillium longisporum]                  | 90.97 | 0      | yes | yes | extr 26                                         | 0 | 0 | 609  | 10 |        |          |          | no  | Apoplastic                    | 0.6  |
| Vna2.648  | hypothetical protein BN1708_012222 [Verticillium longisporum]                           | 97.32 | 8E-72  | yes | yes | extr 23, mito 2, E.R. 2                         | 0 | 0 | 242  | 4  |        |          |          | no  | Apoplastic                    | 0.62 |
| Vna2.657  | hypothetical protein BN1723_015012 [Verticillium longisporum]                           | 62.88 | 0      | yes | yes | extr 17, mito 5, plas 3                         | 0 | 0 | 452  | 5  |        |          |          | no  | Apoplastic                    | 0.66 |
| Vna2.671  | hypothetical protein BN1708_005815 [Verticillium longisporum]                           | 95.6  | 0      | yes | yes | extr 25                                         | 0 | 0 | 582  | 14 |        |          |          | no  | Apoplastic                    | 0.55 |
| Vna2.673  | conserved hypothetical protein VDBG_04002 [Verticillium alfalfae VaMs.102]              | 97    | 3E-63  | yes | yes | extr 15, E.R. 3, golg 3, mito 2, cyto 2, plas 2 | 0 | 0 | 100  | 0  |        |          |          | no  | Apoplastic                    | 0.57 |
| Vna2.689  | extracellular elastolytic metalloproteinase VDBG_03987 [Verticillium alfalfae VaMs.102] | 99.04 | 0      | yes | yes | extr 26                                         | 0 | 0 | 628  | 4  |        |          |          | no  | Apoplastic                    | 0.58 |
| Vna2.691  | hypothetical protein BN1708_005790 [Verticillium longisporum]                           | 96.86 | 1E-130 | yes | yes | extr 13, mito 10.5, cyto_mito 7.333, cyto 3     | 0 | 0 | 191  | 4  |        |          |          | no  | Apoplastic                    | 0.69 |
| Vna2.693  | conserved hypothetical protein VDBG_03983 [Verticillium alfalfae VaMs.102]              | 98.66 | 0      | yes | yes | extr 26                                         | 1 | 1 | 597  | 8  |        |          |          | no  | Non-apoplastic                | 0.52 |
| Vna2.700  | endoglucanase II [Verticillium dahliae VdLs.17] EGY17523                                | 55.6  | 2E-89  | yes | yes | extr 26                                         | 0 | 0 | 228  | 4  |        |          |          | no  | Non-apoplastic                | 0.53 |
| Vna2.738  | hypothetical protein BN1708_013939 [Verticillium longisporum]                           | 92.62 | 0      | yes | yes | extr 27                                         | 0 | 0 | 440  | 12 |        |          |          | yes | Apoplastic                    | 0.85 |
| Vna2.747  | predicted protein VDBG_03926 [Verticillium alfalfae VaMs.102]                           | 97.86 | 1E-167 | yes | yes | extr 10, E.R. 8, mito 2, cyto 2, golg 2, vacu 2 | 0 | 0 | 326  | 10 |        |          |          | no  | Non-apoplastic                | 0.85 |
| Vna2.753  | FAD binding domain-containing protein VDBG_03920 [Verticillium alfalfae VaMs.102]       | 99.39 | 0      | yes | yes | extr 23, mito 2                                 | 0 | 0 | 494  | 3  |        |          |          | no  | Non-apoplastic                | 0.51 |
| Vna2.768  | proclavamate amidinohydrolase VDBG_03903 [Verticillium alfalfae VaMs.102]               | 99.73 | 0      | yes | yes | extr 24, mito 1, cyto 1, golg 1, cyto_mito 1    | 0 | 0 | 372  | 4  |        |          |          | no  | Non-apoplastic                | 0.53 |
| Vna2.775  | hypothetical protein BN1723_007468 [Verticillium longisporum]                           | 69.79 | 5E-170 | yes | yes | extr 15, golg 5, E.R. 3, mito 2                 | 1 | 0 | 334  | 4  |        |          |          | no  | Non-apoplastic                | 0.87 |
| Vna2.778  | conserved hypothetical protein VDBG_03892 [Verticillium alfalfae VaMs.102]              | 99.75 | 0      | yes | yes | extr 13, nucl 5, mito 4, cyto 4, cyto_mito 4    | 0 | 0 | 643  | 3  |        |          |          | no  | Non-apoplastic                | 0.99 |
| Vna2.786  | PAP2 superfamily protein VDBG_03882 [Verticillium alfalfae VaMs.102]                    | 99.47 | 0      | yes | yes | extr 24, mito 3                                 | 0 | 0 | 376  | 14 |        |          |          | yes | Apoplastic                    | 0.9  |
| Vna2.791  | saponin hydrolase [Verticillium dahliae VdLs.17] EGY17422                               | 62.02 | 0      | yes | yes | extr 18, cyto 3.5, mito 3, cyto_nucl 2.5        | 0 | 0 | 647  | 8  | -11.84 | 6.25E-42 | 6.66E-40 | no  | Non-apoplastic                | 0.55 |
| Vna2.792  | hypothetical protein BN1723_017448 [Verticillium longisporum]                           | 99.08 | 0      | yes | yes | extr 21, E.R. 3, golg 2                         | 1 | 0 | 340  | 3  |        |          |          | no  | Non-apoplastic                | 0.85 |
| Vna2.795  | hypothetical protein BN1708_011476 [Verticillium longisporum]                           | 86.8  | 0      | yes | yes | mito 15, cyto 6, extr 5                         | 0 | 0 | 502  | 1  |        |          |          | no  | Non-apoplastic                | 0.91 |
| Vna2.814  | hypothetical protein BN1708_011449 [Verticillium longisporum]                           | 93.45 | 0      | yes | yes | mito 17.5, cyto_mito 12, cyto 5.5, extr 2       | 0 | 0 | 336  | 7  |        |          |          | no  | Mitochondria (0.802   44-131) | 0.98 |
| Vna2.831  | hypothetical protein VDAG_01054 [Verticillium dahliae VdLs.17]                          | 77.62 | 1E-75  | yes | yes | extr 26                                         | 0 | 1 | 210  | 12 |        |          |          | no  | Apoplastic                    | 0.68 |
| Vna2.834  | glutaminyl-peptide cyclotransferase [Verticillium dahliae VdLs.17] EGY17368             | 99.23 | 0      | yes | yes | extr 8, E.R. 6, golg 6, mito 4, plas 2, cyto_m  | 0 | 0 | 388  | 2  |        |          |          | no  | Non-apoplastic                | 0.96 |
| Vna2.836  | predicted protein VDBG_03822 [Verticillium alfalfae VaMs.102]                           | 92.73 | 6E-91  | yes | yes | mito 11, extr 10, cyto 4.5, cyto_nucl 3.5       | 0 | 0 | 160  | 7  |        |          |          | no  | Non-apoplastic                | 0.72 |
| Vna2.837  | conserved hypothetical protein VDBG_03821 [Verticillium alfalfae VaMs.102]              | 98.11 | 0      | yes | yes | extr 19, plas 4, E.R. 2                         | 0 | 0 | 636  | 9  |        |          |          | no  | Non-apoplastic                | 0.79 |
| Vna2.841  | KEX1 protease [Verticillium dahliae VdLs.17] EGY17361                                   | 94.08 | 0      | yes | yes | extr 16, plas 7, mito 1, cyto 1, pero 1, E.R. 1 | 1 | 1 | 862  | 7  |        |          |          | no  | Non-apoplastic                | 0.82 |
| Vna2.882  | hypothetical protein BN1723_002202, partial [Verticillium longisporum]                  | 85.47 | 0      | yes | yes | extr 24, mito 1, cyto 1, vacu 1, cyto_mito 1    | 0 | 0 | 414  | 4  |        |          |          | no  | Apoplastic                    | 0.8  |
| Vna2.897  | TOS1 VDBG_03754 [Verticillium alfalfae VaMs.102]                                        | 95.39 | 0      | yes | yes | extr 25                                         | 0 | 0 | 456  | 9  |        |          |          | no  | Non-apoplastic                | 0.56 |
| Vna2.912  | transcriptional regulatory protein SIN3 VDBG_03738 [Verticillium alfalfae VaMs.102]     | 98.36 | 0      | yes | yes | nucl 7, mito 6, extr 6, cyto 4, vacu 2          | 0 | 0 | 1680 | 13 |        |          |          | no  | Non-apoplastic                | 0.99 |
| Vna2.922  | hypothetical protein BN1708_010464 [Verticillium longisporum]                           | 98.46 | 0      | yes | yes | extr 13, mito 6, cyto 3, mito_nucl 3            | 1 | 1 | 848  | 4  |        |          |          | no  | Non-apoplastic                | 0.86 |
| Vna2.925  | hypothetical protein BN1708_010459 [Verticillium longisporum]                           | 78.95 | 1E-53  | yes | yes | mito 14, extr 12                                | 0 | 0 | 341  | 1  |        |          |          | no  | Apoplastic                    | 0.67 |
| Vna2.938  | conserved hypothetical protein VDBG_03712 [Verticillium alfalfae VaMs.102]              | 99.55 | 5E-157 | yes | yes | extr 18, mito 3, cyto 3, pero 3, cyto_mito 3, c | 0 | 0 | 224  | 4  |        |          |          | no  | Apoplastic                    | 0.62 |
| Vna2.952  | hypothetical protein BN1708_010434 [Verticillium longisporum]                           | 63.8  | 0      | yes | yes | extr 16, mito 4, nucl 2, plas 2, pero 2         | 1 | 1 | 825  | 23 |        |          |          | yes | Non-apoplastic                | 0.83 |
| Vna2.953  | NIMA-interacting protein TimC [Verticillium dahliae VdLs.17] EGY17248                   | 92.93 | 0      | yes | yes | extr 13, mito 3, plas 3, pero 2, E.R. 2, golg 2 | 1 | 0 | 971  | 7  |        |          |          | no  | Non-apoplastic                | 0.98 |
| Vna2.967  | hypothetical protein BN1723_017401 [Verticillium longisporum]                           | 53.33 | 3E-13  | yes | yes | extr 19, plas 4, mito 2                         | 0 | 0 | 60   | 5  |        |          |          | no  | Apoplastic                    | 0.66 |
| Vna2.979  | LysM domain-containing protein [Verticillium dahliae VdLs.17] EGY17220                  | 94.55 | 0      | yes | yes | extr 25                                         | 0 | 0 | 367  | 16 |        |          |          | no  | Apoplastic                    | 0.76 |
| Vna2.980  | hypothetical protein BN1708_014869 [Verticillium longisporum]                           | 99.74 | 0      | yes | yes | extr 12, mito 6, cyto 3, E.R. 3, mito_nucl 3    | 0 | 1 | 1347 | 45 |        |          |          | no  | Non-apoplastic                | 0.91 |
| Vna2.981  | predicted protein VDBG_03670 [Verticillium alfalfae VaMs.102]                           | 99.62 | 0      | yes | yes | extr 12, mito 8, cyto 4, vacu 2, cyto_pero 2    | 0 | 0 | 261  | 4  |        |          |          | no  | Non-apoplastic                | 0.7  |
| Vna2.1027 | L-amino acid oxidase VDBG_03617 [Verticillium alfalfae VaMs.102]                        | 99.18 | 0      | yes | yes | extr 21, mito 2, E.R. 2, golg 2                 | 0 | 0 | 611  | 3  |        |          |          | no  | Non-apoplastic                | 0.54 |
| Vna2.1033 | hypothetical protein BN1708_001826 [Verticillium longisporum]                           | 36.36 | 6E-09  | yes | yes | mito 13, extr 12                                | 0 | 0 | 151  | 4  |        |          |          | no  | Non-apoplastic                | 0.63 |
| Vna2.1043 | hypothetical protein BN1708_001835 [Verticillium longisporum]                           | 95.51 | 0      | yes | yes | extr 21, mito 3, cyto 1, E.R. 1, golg 1         | 0 | 0 | 490  | 5  |        |          |          | no  | Non-apoplastic                | 0.87 |
| Vna2.1044 | predicted protein VDBG_03599 [Verticillium alfalfae VaMs.102]                           | 95.41 | 0      | yes | yes | mito 11, extr 9, cyto 6                         | 0 | 0 | 754  | 6  |        |          |          | no  | Apoplastic                    | 0.66 |
| Vna2.1057 | predicted protein VDBG_03584 [Verticillium alfalfae VaMs.102]                           | 99.22 | 3E-88  | yes | yes | extr 24, E.R. 2                                 | 0 | 0 | 129  | 12 |        |          |          | no  | Apoplastic                    | 0.77 |
| Vna2.1067 | hypothetical protein BN1708_013326 [Verticillium longisporum]                           | 89.3  | 3E-138 | yes | yes | extr 10, plas 6, cyto 3, E.R. 3, golg 3         | 1 | 0 | 444  | 9  |        |          |          | no  | Non-apoplastic                | 1    |
| Vna2.1071 | predicted protein VDBG_03569 [Verticillium alfalfae VaMs.102]                           | 83.61 | 8E-138 | yes | yes | mito 6.5, extr 6, E.R. 5, plas 4, golg 4, cyto  | 0 | 0 | 238  | 3  |        |          |          | no  | Non-apoplastic                | 0.98 |

|           |                                                                                           |       |        |     |     |                                                   |   |   |      |    |       |          |          |     |                              |               |      |
|-----------|-------------------------------------------------------------------------------------------|-------|--------|-----|-----|---------------------------------------------------|---|---|------|----|-------|----------|----------|-----|------------------------------|---------------|------|
| Vna2.1085 | hypothetical protein BN1708_008333, partial [Verticillium longisporum]                    | 90.04 | 0      | yes | yes | extr 26                                           | 0 | 0 | 658  | 7  |       |          |          | no  |                              | Apoplasic     | 0.84 |
| Vna2.1099 | conserved hypothetical protein VDBG_03558 [Verticillium alfalfae VaMs.102]                | 96.97 | 0      | yes | yes | extr 23, cyto 3                                   | 1 | 0 | 495  | 4  |       |          |          | no  |                              | Apoplasic     | 0.65 |
| Vna2.1113 | predicted protein VDBG_03525 [Verticillium alfalfae VaMs.102]                             | 99.55 | 0      | yes | yes | extr 12, nucl 4, cyto 3, pero 3, mito_nucl 3, c   | 0 | 0 | 444  | 6  |       |          |          | no  |                              | Non-apoplasic | 0.78 |
| Vna2.1121 | hypothetical protein VDAG_09868 [Verticillium dahliae VdLs.17]                            | -     | -      | yes | yes | extr 22, mito 3                                   | 1 | 1 | 302  | 4  |       |          |          | no  |                              | Apoplasic     | 0.75 |
| Vna2.1133 | hypothetical protein BN1708_006894, partial [Verticillium longisporum]                    | 82.91 | 5E-128 | yes | yes | extr 21, cyto 3, mito 1, pero 1, E.R. 1           | 0 | 1 | 232  | 0  |       |          |          | no  |                              | Non-apoplasic | 0.66 |
| Vna2.1134 | predicted protein VDBG_03504 [Verticillium alfalfae VaMs.102]                             | 100   | 3E-133 | yes | yes | extr 20, cyto 3, E.R. 2                           | 0 | 0 | 192  | 4  |       |          |          | no  |                              | Non-apoplasic | 0.53 |
| Vna2.1135 | beta-Ig-H3/Fasciicin VDBG_03503 [Verticillium alfalfae VaMs.102]                          | 99.71 | 0      | yes | yes | extr 25                                           | 0 | 0 | 347  | 0  |       |          |          | no  |                              | Apoplasic     | 0.55 |
| Vna2.1139 | hypothetical protein BN1708_006906, partial [Verticillium longisporum]                    | 73.07 | 0      | yes | yes | extr 21, mito 3, pero 2                           | 0 | 0 | 556  | 14 |       |          |          | no  |                              | Non-apoplasic | 0.73 |
| Vna2.1140 | hypothetical protein VDAG_09887 [Verticillium dahliae VdLs.17]                            | 43.87 | 3E-90  | yes | yes | extr 25                                           | 1 | 1 | 479  | 11 |       |          |          | no  |                              | Apoplasic     | 0.64 |
| Vna2.1145 | hypothetical protein BN1723_003498, partial [Verticillium longisporum]                    | 92.97 | 3E-153 | yes | yes | extr 15, mito 6, cyto 2, pero 2, cyto_pero 2      | 0 | 0 | 367  | 10 |       |          |          | no  |                              | Apoplasic     | 0.63 |
| Vna2.1150 | hypothetical protein BN1708_002461 [Verticillium longisporum]                             | 91.77 | 0      | yes | yes | extr 21, mito 4                                   | 0 | 0 | 474  | 2  |       |          |          | no  |                              | Non-apoplasic | 0.58 |
| Vna2.1151 | hypothetical protein BN1708_002462 [Verticillium longisporum]                             | 98.32 | 1E-50  | yes | yes | extr 22, cyto 2, mito 1, cyto_nucl 1, E.R. 1, v   | 1 | 1 | 645  | 0  | -3.55 | 2.71E-08 | 8.60E-07 | no  |                              | Non-apoplasic | 0.52 |
| Vna2.1157 | dipeptidyl-peptidase [Verticillium dahliae VdLs.17] EGY22970                              | 90.93 | 0      | yes | yes | extr 18, mito 3, nucl 2, vacu 2, cyto_mito 2      | 0 | 0 | 706  | 5  |       |          |          | no  | Chloroplast (0.987   30-50)  | Apoplasic     | 0.83 |
| Vna2.1158 | conserved hypothetical protein VDBG_04867 [Verticillium alfalfae VaMs.102]                | 92.15 | 1E-174 | yes | yes | extr 26                                           | 0 | 0 | 293  | 24 |       |          |          | no  |                              | Apoplasic     | 0.93 |
| Vna2.1160 | conserved hypothetical protein VDBG_04865 [Verticillium alfalfae VaMs.102]                | 99.54 | 1E-156 | yes | yes | extr 24, pero 1, E.R. 1, vacu 1                   | 0 | 0 | 219  | 4  |       |          |          | no  |                              | Non-apoplasic | 0.85 |
| Vna2.1161 | cellulose-growth-specific protein VDBG_04864 [Verticillium alfalfae VaMs.102]             | 99.23 | 0      | yes | yes | extr 25                                           | 0 | 0 | 261  | 4  |       |          |          | no  |                              | Apoplasic     | 0.86 |
| Vna2.1191 | D-amino-acid oxidase VDBG_03471 [Verticillium alfalfae VaMs.102]                          | 87.43 | 0      | yes | yes | extr 13, plas 4, E.R. 4, mito 3, cyto 2           | 0 | 0 | 360  | 6  | 1.67  | 4.00E-10 | 1.69E-08 | no  |                              | Non-apoplasic | 0.96 |
| Vna2.1195 | hypothetical protein BN1708_006944 [Verticillium longisporum]                             | 89    | 0      | yes | yes | extr 22, mito 2, plas 1, golg 1, vacu 1, cyto 1   | 1 | 1 | 618  | 7  |       |          |          | no  |                              | Non-apoplasic | 0.54 |
| Vna2.1196 | beta-xylosidase [Verticillium dahliae VdLs.17] EGY19586                                   | 62.97 | 3E-137 | yes | yes | extr 24, mito 1, plas 1, E.R. 1                   | 0 | 0 | 325  | 0  |       |          |          | no  |                              | Apoplasic     | 0.62 |
| Vna3.5    | hypothetical protein BN1723_007367 [Verticillium longisporum]                             | 93.65 | 0      | yes | yes | extr 25                                           | 0 | 1 | 1418 | 15 |       |          |          | no  | Chloroplast (0.812   38-73)  | Non-apoplasic | 0.79 |
| Vna3.9    | hypothetical protein BN1708_017245, partial [Verticillium longisporum]                    | 95.05 | 0      | yes | yes | extr 21, nucl 2.5, mito 2, cyto_nucl 2            | 0 | 0 | 546  | 6  |       |          |          | no  |                              | Apoplasic     | 0.6  |
| Vna3.19   | hypothetical protein BN1708_010897, partial [Verticillium longisporum]                    | 93.02 | 4E-123 | yes | yes | extr 22, mito 2, E.R. 1, golg 1, vacu 1, cyto 1   | 0 | 0 | 218  | 4  |       |          |          | no  |                              | Apoplasic     | 0.58 |
| Vna3.33   | hypothetical protein BN1708_010904 [Verticillium longisporum]                             | 98.37 | 0      | yes | yes | cyto 8.5, cyto_nucl 6.5, E.R. 5, nucl 3.5, golg 1 | 1 | 0 | 718  | 9  |       |          |          | no  |                              | Non-apoplasic | 1    |
| Vna3.35   | hypothetical protein BN1708_012463 [Verticillium longisporum]                             | 90.76 | 0      | yes | yes | extr 22, E.R. 2, mito 1, plas 1, golg 1           | 0 | 0 | 388  | 7  |       |          |          | no  |                              | Non-apoplasic | 0.79 |
| Vna3.45   | hypothetical protein BN1708_004360, partial [Verticillium longisporum]                    | 83.99 | 0      | yes | yes | extr 24, mito 1, pero 1, E.R. 1                   | 0 | 0 | 412  | 4  |       |          |          | yes |                              | Non-apoplasic | 0.53 |
| Vna3.46   | hypothetical protein BN1723_011800 [Verticillium longisporum]                             | 67.43 | 0      | yes | yes | extr 25                                           | 0 | 0 | 518  | 9  |       |          |          | no  |                              | Non-apoplasic | 0.55 |
| Vna3.47   | hypothetical protein BN1708_004358 [Verticillium longisporum]                             | 97.85 | 0      | yes | yes | extr 26                                           | 0 | 0 | 734  | 0  |       |          |          | no  |                              | Apoplasic     | 0.78 |
| Vna3.54   | hypothetical protein BN1708_016729 [Verticillium longisporum]                             | 72.8  | 0      | yes | yes | extr 14, mito 8, cyto 4                           | 0 | 0 | 386  | 10 |       |          |          | no  |                              | Non-apoplasic | 0.83 |
| Vna3.56   | hypothetical protein BN1723_017556 [Verticillium longisporum]                             | 96.01 | 0      | yes | yes | extr 26                                           | 0 | 0 | 501  | 6  |       |          |          | yes |                              | Apoplasic     | 0.68 |
| Vna3.70   | peptidase M14 VDBG_10071 [Verticillium alfalfae VaMs.102]                                 | 98.87 | 0      | yes | yes | extr 15, plas 3, E.R. 2, golg 2, vacu 2, mito 1   | 0 | 0 | 441  | 5  |       |          |          | no  |                              | Non-apoplasic | 0.8  |
| Vna3.95   | hypothetical protein BN1708_010184 [Verticillium longisporum]                             | 92.94 | 0      | yes | yes | extr 26                                           | 0 | 0 | 841  | 13 |       |          |          | no  |                              | Apoplasic     | 0.84 |
| Vna3.97   | hypothetical protein VDAG_05398 [Verticillium dahliae VdLs.17]                            | 90.3  | 1E-74  | yes | yes | extr 8, mito 5, nucl 4, cyto 4, cyto_nucl 4       | 1 | 0 | 374  | 4  |       |          |          | no  |                              | Non-apoplasic | 0.77 |
| Vna3.100  | pectate lyase B VDBG_07839 [Verticillium alfalfae VaMs.102]                               | 100   | 0      | yes | yes | extr 25                                           | 0 | 0 | 325  | 3  |       |          |          | yes | Chloroplast (0.914   70-121) | Apoplasic     | 0.82 |
| Vna3.103  | predicted protein VDBG_07842 [Verticillium alfalfae VaMs.102]                             | 91.06 | 0      | yes | yes | extr 18, E.R. 3, plas 2, golg 2                   | 0 | 0 | 302  | 6  |       |          |          | no  |                              | Non-apoplasic | 0.85 |
| Vna3.107  | lipase [Verticillium dahliae VdLs.17] EGY14246                                            | 90.56 | 0      | yes | yes | extr 25                                           | 0 | 0 | 572  | 5  |       |          |          | no  |                              | Non-apoplasic | 0.5  |
| Vna3.114  | hypothetical protein BN1708_001858 [Verticillium longisporum]                             | 73.53 | 1E-65  | yes | yes | extr 26                                           | 0 | 0 | 138  | 4  |       |          |          | no  |                              | Apoplasic     | 0.83 |
| Vna3.118  | hypothetical protein BN1708_009674 [Verticillium longisporum]                             | 79.07 | 2E-94  | yes | yes | extr 25                                           | 0 | 0 | 213  | 8  |       |          |          | no  |                              | Apoplasic     | 0.63 |
| Vna3.125  | glycolipid 2-alpha-mannosyltransferase VDBG_07863 [Verticillium alfalfae VaMs.102]        | 98.25 | 0      | yes | yes | extr 16, plas 3, pero 2, E.R. 2, golg 2           | 0 | 0 | 406  | 7  |       |          |          | no  |                              | Non-apoplasic | 0.74 |
| Vna3.137  | metalloprotease VDBG_07883 [Verticillium alfalfae VaMs.102]                               | 99.28 | 0      | yes | yes | extr 22, mito 4                                   | 0 | 0 | 276  | 8  |       |          |          | no  |                              | Non-apoplasic | 0.53 |
| Vna3.143  | gamma-glutamyltranspeptidase VDBG_07889 [Verticillium alfalfae VaMs.102]                  | 99.11 | 0      | yes | yes | extr 14, cyto 7.5, cyto_nucl 4.5, mito 4          | 0 | 0 | 561  | 3  | -2.75 | 1.51E-07 | 4.13E-06 | yes |                              | Non-apoplasic | 0.65 |
| Vna3.146  | acetyl xylan esterase VDBG_07891 [Verticillium alfalfae VaMs.102]                         | 99.07 | 0      | yes | yes | extr 26                                           | 0 | 0 | 358  | 10 |       |          |          | no  |                              | Apoplasic     | 0.59 |
| Vna3.167  | conserved hypothetical protein VDBG_07911 [Verticillium alfalfae VaMs.102]                | 99.14 | 0      | yes | yes | extr 26                                           | 0 | 0 | 349  | 5  |       |          |          | no  |                              | Apoplasic     | 0.56 |
| Vna3.183  | feruloyl esterase B VDBG_07929 [Verticillium alfalfae VaMs.102]                           | 99.63 | 0      | yes | yes | extr 18, mito 3, cyto 3, cyto_mito 3              | 0 | 0 | 546  | 11 |       |          |          | no  |                              | Non-apoplasic | 0.66 |
| Vna3.188  | hypothetical protein BN1723_011465 [Verticillium longisporum]                             | 61.86 | 6E-138 | yes | yes | extr 20, mito 4, cyto 1, pero 1, vacu 1, cyto p   | 0 | 0 | 293  | 1  |       |          |          | no  |                              | Apoplasic     | 0.63 |
| Vna3.219  | lipase [Verticillium dahliae VdLs.17] EGY14381                                            | 84.71 | 0      | yes | yes | extr 27                                           | 0 | 0 | 554  | 5  |       |          |          | yes |                              | Apoplasic     | 0.66 |
| Vna3.237  | hypothetical protein BN1708_006983 [Verticillium longisporum]                             | 61.94 | 0      | yes | yes | extr 16, mito 4, cyto 3, plas 2, mito_nucl 2, c   | 0 | 0 | 1072 | 15 |       |          |          | no  |                              | Non-apoplasic | 0.73 |
| Vna3.248  | periplasmic beta-glucosidase VDBG_08009 [Verticillium alfalfae VaMs.102]                  | 99.61 | 0      | yes | yes | cyto 16, mito 5, extr 4                           | 0 | 0 | 774  | 6  |       |          |          | no  |                              | Non-apoplasic | 0.83 |
| Vna3.256  | hypothetical protein BN1708_007014 [Verticillium longisporum]                             | 76.7  | 0      | yes | yes | extr 21, mito 2, cyto 2, E.R. 2, cyto_mito 2      | 0 | 0 | 660  | 2  |       |          |          | no  |                              | Non-apoplasic | 0.84 |
| Vna3.270  | hypothetical protein BN1708_003259 [Verticillium longisporum]                             | 64.49 | 0      | yes | yes | extr 23, mito 3                                   | 0 | 1 | 1182 | 6  |       |          |          | no  |                              | Apoplasic     | 0.55 |
| Vna3.293  | neutral ceramidase VDBG_08059 [Verticillium alfalfae VaMs.102]                            | 98.77 | 0      | yes | yes | extr 25                                           | 1 | 0 | 727  | 7  |       |          |          | yes | Mitochondria (0.969   69-89) | Apoplasic     | 0.58 |
| Vna3.296  | predicted protein VDBG_08062 [Verticillium alfalfae VaMs.102]                             | 54.26 | 6E-40  | yes | yes | extr 22, cyto 2.5, cyto_nucl 2                    | 0 | 0 | 188  | 7  |       |          |          | no  | Chloroplast (0.892   43-120) | Non-apoplasic | 0.6  |
| Vna3.320  | hypothetical protein BN1708_012793 [Verticillium longisporum]                             | 51.55 | 2E-23  | yes | yes | extr 26                                           | 0 | 0 | 94   | 8  |       |          |          | no  |                              | Apoplasic     | 0.89 |
| Vna3.338  | endonuclease/exonuclease/phosphatase family protein [Verticillium dahliae VdLs.17] EGY179 | 90.56 | 0      | yes | yes | extr 22, cyto 2, mito 1, cyto_nucl 1, E.R. 1, v   | 0 | 0 | 604  | 3  |       |          |          | no  |                              | Apoplasic     | 0.61 |
| Vna3.350  | hypothetical protein BN1723_014741 [Verticillium longisporum]                             | 68.6  | 1E-97  | yes | yes | extr 26                                           | 0 | 0 | 393  | 16 |       |          |          | no  |                              | Apoplasic     | 0.7  |
| Vna3.353  | hypothetical protein BN1723_012617, partial [Verticillium longisporum]                    | 37.65 | 5E-16  | yes | yes | extr 13, mito 4, E.R. 4, pero 2, nucl 1, cyto 1   | 0 | 0 | 171  | 15 | 4.49  | 4.44E-16 | 3.49E-14 | no  |                              | Non-apoplasic | 0.81 |
| Vna3.381  | allergen rAsp f9-like protein [Verticillium dahliae]                                      | 93.62 | 0      | yes | yes | extr 21, cyto 3, mito 2                           | 0 | 0 | 400  | 4  |       |          |          | yes |                              | Apoplasic     | 0.63 |
| Vna3.384  | tyrosinase VDBG_08159 [Verticillium alfalfae VaMs.102]                                    | 99.65 | 0      | yes | yes | mito 8, extr 8, cyto 5.5, cyto_nucl 5, nucl 3.5   | 0 | 0 | 569  | 5  | 1.61  | 2.52E-07 | 6.60E-06 | no  |                              | Non-apoplasic | 0.92 |
| Vna3.446  | conserved hypothetical protein VDBG_05104 [Verticillium alfalfae VaMs.102]                | 99.29 | 5E-97  | yes | yes | extr 13, plas 6, mito 3, cyto 3, cyto_mito 3      | 1 | 1 | 141  | 2  |       |          |          | no  |                              | Non-apoplasic | 0.59 |
| Vna3.492  | hydrophobin VDBG_05155 [Verticillium alfalfae VaMs.102]                                   | 100   | 6E-57  | yes | yes | extr 26                                           | 0 | 0 | 95   | 8  |       |          |          | no  |                              | Apoplasic     | 0.85 |
| Vna3.494  | feruloyl esterase B VDBG_05157 [Verticillium alfalfae VaMs.102]                           | 98.11 | 0      | yes | yes | extr 22, E.R. 2, mito 1, plas 1, vacu 1           | 0 | 0 | 530  | 13 |       |          |          | no  |                              | Non-apoplasic | 0.75 |
| Vna3.501  | oxidoreductase VDBG_05166 [Verticillium alfalfae VaMs.102]                                | 97.87 | 0      | yes | yes | extr 15, mito 10                                  | 0 | 0 | 423  | 6  |       |          |          | no  |                              | Non-apoplasic | 0.61 |
| Vna3.516  | FAD binding domain-containing protein VDBG_05205 [Verticillium alfalfae VaMs.102]         | 96.8  | 0      | yes | yes | extr 26                                           | 0 | 0 | 500  | 7  |       |          |          | no  |                              | Apoplasic     | 0.68 |

|                  |                                                                                      |       |        |     |     |                                                 |   |   |      |    |       |          |          |                             |                              |           |      |
|------------------|--------------------------------------------------------------------------------------|-------|--------|-----|-----|-------------------------------------------------|---|---|------|----|-------|----------|----------|-----------------------------|------------------------------|-----------|------|
| <i>Vna3.528</i>  | ribonuclease Trv VDBG_05217 [Verticillium alfalfae VaMs.102]                         | 97.82 | 0      | yes | yes | extr 24, vacu 2                                 | 0 | 0 | 412  | 13 |       |          | no       | Apoplatic                   | 0.76                         |           |      |
| <i>Vna3.545</i>  | yeaC VDBG_05233 [Verticillium alfalfae VaMs.102]                                     | 98.77 | 1E-173 | yes | yes | extr 26                                         | 0 | 0 | 244  | 1  |       |          | no       | Apoplatic                   | 0.73                         |           |      |
| <i>Vna3.548</i>  | hypothetical protein BN1708_002052, partial [Verticillium longisporum]               | 95.61 | 0      | yes | yes | extr 14, cyto 6, cyto_mito 5.833, mito 4.5, cy  | 0 | 0 | 547  | 1  |       |          | no       | Non-apoplatic               | 0.67                         |           |      |
| <i>Vna3.549</i>  | FG-GAP repeat domain-containing protein [Verticillium dahliae VdLs.17] EGY18706      | 98.86 | 0      | yes | yes | extr 20, mito 3, cyto 2                         | 0 | 0 | 1158 | 9  |       |          | no       | Non-apoplatic               | 0.52                         |           |      |
| <i>Vna3.580</i>  | protein-arginine deiminase type-3 VDBG_05270 [Verticillium alfalfae VaMs.102]        | 78.98 | 0      | yes | yes | extr 17, cyto 4, mito 2, nucl 1, pero 1, E.R. 1 | 0 | 0 | 640  | 7  |       |          | no       | Non-apoplatic               | 0.77                         |           |      |
| <i>Vna3.584</i>  | PEPAd [Verticillium dahliae VdLs.17] EGY15761                                        | 94.97 | 0      | yes | yes | extr 26                                         | 0 | 0 | 570  | 8  |       |          | no       | Non-apoplatic               | 0.61                         |           |      |
| <i>Vna3.585</i>  | CHD5 domain-containing protein VDBG_05275 [Verticillium alfalfae VaMs.102]           | 98.56 | 4E-149 | yes | yes | extr 12, mito 7, plas 4, E.R. 2                 | 0 | 0 | 213  | 1  |       |          | no       | Non-apoplatic               | 0.87                         |           |      |
| <i>Vna3.589</i>  | hypothetical protein VDAG_06930 [Verticillium dahliae VdLs.17]                       | 96.35 | 0      | yes | yes | extr 27                                         | 0 | 0 | 383  | 5  |       |          | no       | Apoplatic                   | 0.84                         |           |      |
| <i>Vna3.593</i>  | aldose 1-epimerase VDBG_05284 [Verticillium alfalfae VaMs.102]                       | 100   | 0      | yes | yes | extr 27                                         | 0 | 0 | 410  | 6  |       |          | no       | Apoplatic                   | 0.63                         |           |      |
| <i>Vna3.614</i>  | hypothetical protein BN1723_012753 [Verticillium longisporum]                        | 73.67 | 0      | yes | yes | extr 17, mito 7, pero 2                         | 0 | 0 | 379  | 3  |       |          | no       | Non-apoplatic               | 0.6                          |           |      |
| <i>Vna3.624</i>  | hypothetical protein BN1708_014952 [Verticillium longisporum]                        | 53.06 | 8E-88  | yes | yes | extr 12, plas 11, mito 2                        | 1 | 1 | 251  | 5  |       |          | no       | Non-apoplatic               | 0.56                         |           |      |
| <i>Vna3.636</i>  | hypothetical protein BN1708_009708 [Verticillium longisporum]                        | 48.24 | 3E-88  | yes | yes | extr 17, cyto 7, mito 3                         | 0 | 0 | 373  | 6  |       |          | no       | Apoplatic                   | 0.69                         |           |      |
| <i>Vna3.649</i>  | necrosis-and ethylene-inducing protein VDBG_05343 [Verticillium alfalfae VaMs.102]   | 99.58 | 7E-175 | yes | yes | extr 26                                         | 0 | 0 | 239  | 2  |       |          | yes      | Apoplatic                   | 0.78                         |           |      |
| <i>Vna3.653</i>  | hypothetical protein BN1723_013452 [Verticillium longisporum]                        | 82.12 | 0      | yes | yes | extr 18, plas 3, E.R. 3, mito 2                 | 0 | 0 | 354  | 1  |       |          | no       | Non-apoplatic               | 0.61                         |           |      |
| <i>Vna3.654</i>  | predicted protein VDBG_05349 [Verticillium alfalfae VaMs.102]                        | 93.56 | 0      | yes | yes | extr 18, mito 8                                 | 0 | 0 | 388  | 2  |       |          | no       | Non-apoplatic               | 0.59                         |           |      |
| <i>Vna3.670</i>  | hypothetical protein BN1708_002625 [Verticillium longisporum]                        | 65.91 | 0      | yes | yes | extr 21, plas 5                                 | 1 | 0 | 816  | 10 |       |          | no       | Non-apoplatic               | 0.83                         |           |      |
| <i>Vna3.699</i>  | zinc metalloprotease mde10 [Verticillium dahliae VdLs.17] EGY15892                   | 99.53 | 0      | yes | yes | extr 19, cyto 2, golg 2, nucl 1, mito 1, pero 1 | 1 | 1 | 831  | 45 |       |          | no       | Non-apoplatic               | 0.53                         |           |      |
| <i>Vna3.706</i>  | hypothetical protein BN1708_003837 [Verticillium longisporum]                        | 89.96 | 0      | yes | yes | extr 27                                         | 0 | 0 | 797  | 13 |       |          | yes      | Apoplatic                   | 0.82                         |           |      |
| <i>Vna3.713</i>  | conserved hypothetical protein VDBG_05425 [Verticillium alfalfae VaMs.102]           | 100   | 0      | yes | yes | extr 24, mito 2                                 | 0 | 0 | 489  | 7  | 3.37  | 0        | 0        | yes                         | Non-apoplatic                | 0.55      |      |
| <i>Vna3.735</i>  | hypothetical protein BN1708_003911 [Verticillium longisporum]                        | 94.78 | 0      | yes | yes | extr 14, mito 8, cyto 3                         | 0 | 0 | 268  | 2  |       |          | no       | Non-apoplatic               | 0.87                         |           |      |
| <i>Vna3.748</i>  | conserved hypothetical protein VDBG_05464 [Verticillium alfalfae VaMs.102]           | 97.88 | 0      | yes | yes | extr 22, pero 2, mito 1, cyto 1, vacu 1, cyto 1 | 0 | 0 | 897  | 9  |       |          | no       | Non-apoplatic               | 0.61                         |           |      |
| <i>Vna3.750</i>  | hypothetical protein VDAG_07115 [Verticillium dahliae VdLs.17]                       | 98.2  | 0      | yes | yes | extr 18, mito 6, pero 1                         | 0 | 0 | 333  | 8  |       |          | no       | Non-apoplatic               | 0.52                         |           |      |
| <i>Vna3.754</i>  | rhamnoglacturonase lyase [Verticillium dahliae VdLs.17] EGY15955                     | 99    | 0      | yes | yes | extr 22, mito 3                                 | 0 | 0 | 668  | 5  |       |          | no       | Apoplatic                   | 0.55                         |           |      |
| <i>Vna3.756</i>  | conserved hypothetical protein VDBG_05473 [Verticillium alfalfae VaMs.102]           | 97.96 | 0      | yes | yes | cyto 7.5, cyto_nucl 6.5, nucl 4.5, mito 4, plas | 0 | 0 | 2057 | 17 |       |          | no       | Non-apoplatic               | 1                            |           |      |
| <i>Vna3.768</i>  | starch binding domain-containing protein VDBG_05484 [Verticillium alfalfae VaMs.102] | 96.75 | 0      | yes | yes | extr 26                                         | 0 | 0 | 388  | 16 |       |          | yes      | Apoplatic                   | 0.95                         |           |      |
| <i>Vna3.770</i>  | hypothetical protein BN1708_012066 [Verticillium longisporum]                        | 99.41 | 0      | yes | yes | extr 20, mito 2, cyto 2, pero 2, cyto_mito 2, c | 0 | 0 | 341  | 10 | -7.00 | 9.27E-07 | 2.17E-05 | yes                         | Non-apoplatic                | 0.83      |      |
| <i>Vna3.772</i>  | hypothetical protein VDAG_07139 [Verticillium dahliae VdLs.17]                       | 99.18 | 0      | yes | yes | mito 16, cyto 5, extr 4                         | 0 | 0 | 431  | 4  | -2.34 | 3.61E-13 | 2.13E-11 | no                          | Non-apoplatic                | 0.95      |      |
| <i>Vna3.777</i>  | polysaccharide deacetylase family protein [Verticillium dahliae VdLs.17] EGY15978    | 99.12 | 4E-165 | yes | yes | mito 11, extr 9, pero 3, nucl 2, cyto 2, cyto n | 0 | 0 | 247  | 3  |       |          | yes      | Non-apoplatic               | 0.52                         |           |      |
| <i>Vna3.778</i>  | hypothetical protein BN1708_012062 [Verticillium longisporum]                        | 95.25 | 0      | yes | yes | extr 23, mito 1, E.R. 1, golg 1, vacu 1         | 0 | 0 | 1151 | 19 |       |          | no       | Non-apoplatic               | 0.61                         |           |      |
| <i>Vna3.779</i>  | pectin lyase VDBG_05494 [Verticillium alfalfae VaMs.102]                             | 98.98 | 0      | yes | yes | extr 15, cyto 6.5, mito 5, cyto_nucl 4          | 0 | 0 | 394  | 6  | 4.35  | 0        | 0        | no                          | Apoplatic                    | 0.83      |      |
| <i>Vna3.781</i>  | predicted protein VDBG_05497 [Verticillium alfalfae VaMs.102]                        | 98.26 | 2E-165 | yes | yes | extr 22, cyto 2, mito 1, cyto_nucl 1, E.R. 1, g | 0 | 0 | 230  | 10 |       |          | no       | Non-apoplatic               | 0.66                         |           |      |
| <i>Vna3.783</i>  | conserved hypothetical protein VDBG_05499 [Verticillium alfalfae VaMs.102]           | 97.48 | 2E-166 | yes | yes | mito 15, extr 7, cyto 4                         | 0 | 0 | 486  | 14 |       |          | no       | Non-apoplatic               | 1                            |           |      |
| <i>Vna3.791</i>  | ECM14 protein [Verticillium dahliae VdLs.17] EGY15994                                | 58.41 | 0      | yes | yes | extr 17, cyto 3, mito 2, cyto_nucl 2, pero 2    | 0 | 0 | 442  | 5  |       |          | no       | Non-apoplatic               | 0.79                         |           |      |
| <i>Vna3.795</i>  | hypothetical protein VDAG_07165 [Verticillium dahliae VdLs.17]                       | 97.8  | 0      | yes | yes | extr 27                                         | 1 | 1 | 445  | 13 |       |          | no       | Apoplatic                   | 0.66                         |           |      |
| <i>Vna3.801</i>  | hypothetical protein BN1708_011798, partial [Verticillium longisporum]               | 99.44 | 0      | yes | yes | extr 22, cyto 3                                 | 0 | 0 | 635  | 8  |       |          | no       | Apoplatic                   | 0.65                         |           |      |
| <i>Vna3.805</i>  | alkaline proteinase VDBG_05526 [Verticillium alfalfae VaMs.102]                      | 99.75 | 0      | yes | yes | extr 25                                         | 0 | 0 | 393  | 0  |       |          | no       | Apoplatic                   | 0.77                         |           |      |
| <i>Vna3.814</i>  | hypothetical protein BN1708_000324 [Verticillium longisporum]                        | 85.04 | 0      | yes | yes | extr 20, mito 3, pero 2, mito_nucl 2            | 0 | 0 | 401  | 5  |       |          | no       | Non-apoplatic               | 0.64                         |           |      |
| <i>Vna3.817</i>  | feruloyl esterase B VDBG_05538 [Verticillium alfalfae VaMs.102]                      | 99.37 | 0      | yes | yes | extr 24, mito 1, pero 1, vacu 1                 | 0 | 0 | 316  | 7  |       |          | no       | Non-apoplatic               | 0.51                         |           |      |
| <i>Vna3.827</i>  | secreted protein VDBG_05550 [Verticillium alfalfae VaMs.102]                         | 100   | 2E-145 | yes | yes | extr 23, mito 2, cyto 2, cyto_mito 2            | 0 | 0 | 206  | 4  |       |          | yes      | Chloroplast (0.774   75-99) | Apoplatic                    | 0.73      |      |
| <i>Vna3.858</i>  | predicted protein VDBG_05584 [Verticillium alfalfae VaMs.102]                        | 99.26 | 5E-89  | yes | yes | extr 13, plas 6, vacu 4, cyto 2                 | 1 | 1 | 136  | 5  |       |          | no       | Apoplatic                   | 0.61                         |           |      |
| <i>Vna3.868</i>  | hypothetical protein VDAG_07537 [Verticillium dahliae VdLs.17]                       | 85.09 | 6E-104 | yes | yes | extr 22, plas 3                                 | 0 | 0 | 227  | 4  |       |          | no       | Apoplatic                   | 0.76                         |           |      |
| <i>Vna3.877</i>  | hypothetical protein BN1708_013112 [Verticillium longisporum]                        | 88.26 | 3E-174 | yes | yes | extr 16, mito 6, cyto 2, pero 2, cyto_pero 2    | 0 | 0 | 445  | 5  |       |          | no       | Non-apoplatic               | 0.88                         |           |      |
| <i>Vna3.894</i>  | pectate lyase [Verticillium dahliae VdLs.17] EGY16402                                | 76.23 | 2E-172 | yes | yes | extr 25                                         | 0 | 0 | 322  | 2  |       |          | no       | Apoplatic                   | 0.74                         |           |      |
| <i>Vna3.909</i>  | beta-glucosidase VDBG_05647 [Verticillium alfalfae VaMs.102]                         | 98.23 | 0      | yes | yes | extr 23, E.R. 3                                 | 0 | 0 | 792  | 8  |       |          | no       | Non-apoplatic               | 0.75                         |           |      |
| <i>Vna3.923</i>  | predicted protein VDBG_05662 [Verticillium alfalfae VaMs.102]                        | 98.79 | 4E-116 | yes | yes | extr 7, nucl 6.5, cyto_nucl 6, cyto 4.5, mito 4 | 0 | 0 | 165  | 9  |       |          | no       | Non-apoplatic               | 0.8                          |           |      |
| <i>Vna3.926</i>  | exopolysaccharonase VDBG_05666 [Verticillium alfalfae VaMs.102]                      | 99.12 | 0      | yes | yes | extr 26                                         | 0 | 0 | 456  | 11 |       |          | no       | Non-apoplatic               | 0.65                         |           |      |
| <i>Vna3.929</i>  | hypothetical protein BN1708_015694 [Verticillium longisporum]                        | 94.89 | 0      | yes | yes | extr 27                                         | 0 | 0 | 969  | 11 |       |          | no       | Non-apoplatic               | 0.53                         |           |      |
| <i>Vna3.952</i>  | hypothetical protein BN1708_011847 [Verticillium longisporum]                        | 100   | 0      | yes | yes | extr 10, golg 6, plas 5, E.R. 3, vacu 2         | 1 | 0 | 523  | 13 |       |          | no       | Non-apoplatic               | 0.96                         |           |      |
| <i>Vna3.970</i>  | hypothetical protein BN1708_015000 [Verticillium longisporum]                        | 71.18 | 0      | yes | yes | extr 24, mito 2                                 | 0 | 0 | 1021 | 7  |       |          | no       | Non-apoplatic               | 0.51                         |           |      |
| <i>Vna3.972</i>  | hypothetical protein VDAG_07662 [Verticillium dahliae VdLs.17]                       | -     | -      | yes | yes | extr 23, mito 1, cyto 1, pero 1, golg 1, cyto n | 0 | 0 | 181  | 0  |       |          | no       | Apoplatic                   | 0.62                         |           |      |
| <i>Vna3.979</i>  | conserved hypothetical protein VDBG_05733 [Verticillium alfalfae VaMs.102]           | 96.3  | 5E-132 | yes | yes | extr 25                                         | 0 | 0 | 189  | 3  |       |          | no       | Apoplatic                   | 0.69                         |           |      |
| <i>Vna3.988</i>  | conserved hypothetical protein VDBG_05742 [Verticillium alfalfae VaMs.102]           | 99.56 | 1E-156 | yes | yes | extr 26                                         | 1 | 1 | 226  | 8  |       |          | no       | Apoplatic                   | 0.85                         |           |      |
| <i>Vna3.993</i>  | hypothetical protein BN1723_010315 [Verticillium longisporum]                        | 97.43 | 0      | yes | yes | mito 10, extr 9, plas 4, pero 2                 | 0 | 1 | 943  | 21 |       |          | no       | Non-apoplatic               | 0.72                         |           |      |
| <i>Vna3.1010</i> | conserved hypothetical protein VDBG_05768 [Verticillium alfalfae VaMs.102]           | 100   | 2E-92  | yes | yes | extr 26                                         | 0 | 0 | 138  | 7  |       |          | no       | Apoplatic                   | 0.77                         |           |      |
| <i>Vna3.1017</i> | cellulose-growth-specific protein [Verticillium dahliae VdLs.17] EGY16544            | 95.34 | 4E-160 | yes | yes | extr 23, cyto 3                                 | 0 | 0 | 236  | 6  |       |          | no       | Chloroplast (0.941   67-88) | Apoplatic                    | 0.7       |      |
| <i>Vna3.1040</i> | bilirubin oxidase VDBG_05807 [Verticillium alfalfae VaMs.102]                        | 99.83 | 0      | yes | yes | mito 8, extr 6, cyto 5, nucl 3, pero 2, vacu 2  | 0 | 0 | 602  | 2  |       |          | no       | Non-apoplatic               | 0.86                         |           |      |
| <i>Vna3.1041</i> | conserved hypothetical protein VDBG_05808 [Verticillium alfalfae VaMs.102]           | 99.63 | 0      | yes | yes | extr 24, mito 3                                 | 0 | 0 | 544  | 6  | 2.77  | 8.35E-08 | 2.50E-06 | no                          | Apoplatic                    | 0.85      |      |
| <i>Vna3.1044</i> | bacterial leucyl aminopeptidase VDBG_05811 [Verticillium alfalfae VaMs.102]          | 100   | 0      | yes | yes | extr 15, mito 12                                | 0 | 0 | 384  | 5  |       |          | yes      | Non-apoplatic               | 0.55                         |           |      |
| <i>Vna3.1058</i> | pectate lyase B VDBG_05825 [Verticillium alfalfae VaMs.102]                          | 99.09 | 0      | yes | yes | extr 27                                         | 0 | 0 | 331  | 2  | 2.03  | 1.43E-12 | 8.16E-11 | no                          | Chloroplast (0.872   77-102) | Apoplatic | 0.84 |
| <i>Vna4.1</i>    | hypothetical protein FOYG_00777 [Fusarium oxysporum FOSC 3-a]                        | 66.19 | 3E-169 | yes | yes | extr 25                                         | 0 | 0 | 357  | 3  |       |          | no       | Apoplatic                   | 0.58                         |           |      |
| <i>Vna4.2</i>    | small secreted protein [Verticillium nonalfalfae]                                    | 95.35 | 1E-85  | yes | yes | extr 19, E.R. 2, vacu 2, mito 1, cyto 1, plas 1 | 0 | 0 | 129  | 2  |       |          | yes      | Apoplatic                   | 0.7                          |           |      |
| <i>Vna4.7</i>    | endo-1,3(4)-beta-glucanase VDBG_05074 [Verticillium alfalfae VaMs.102]               | 99.76 | 0      | yes | yes | extr 25                                         | 0 | 0 | 838  | 0  |       |          | no       | Chloroplast (1.0   98-119)  | Apoplatic                    | 0.66      |      |

|          |                                                                                |       |        |     |     |                                                 |   |   |      |    |        |          |          |  |     |                              |                |      |
|----------|--------------------------------------------------------------------------------|-------|--------|-----|-----|-------------------------------------------------|---|---|------|----|--------|----------|----------|--|-----|------------------------------|----------------|------|
| Vna4.10  | hypothetical protein BN1708_001927, partial [Verticillium longisporum]         | 98.72 | 2E-103 | yes | yes | extr 23, pero 2                                 | 0 | 0 | 200  | 5  |        |          |          |  | no  |                              | Non-apoplastic | 0.55 |
| Vna4.13  | hypothetical protein BN1708_005407 [Verticillium longisporum]                  | 94.85 | 2E-151 | yes | yes | extr 27                                         | 0 | 0 | 240  | 12 |        |          |          |  | no  |                              | Apoplastic     | 0.84 |
| Vna4.27  | 3-phytase VDBG_05051 [Verticillium alfalfae VaMs.102]                          | 99.07 | 0      | yes | yes | extr 22, cyto 2, mito 1, cyto_nucl 1, E.R. 1, v | 0 | 0 | 753  | 19 |        |          |          |  | no  |                              | Non-apoplastic | 0.55 |
| Vna4.28  | hypothetical protein BN1708_013908 [Verticillium longisporum]                  | 93.01 | 3E-117 | yes | yes | extr 9, mito 7, plas 5, nucl 2, E.R. 2          | 1 | 1 | 383  | 11 |        |          |          |  | no  |                              | Non-apoplastic | 1    |
| Vna4.36  | conserved hypothetical protein VDBG_05039 [Verticillium alfalfae VaMs.102]     | 98.98 | 0      | yes | yes | extr 25                                         | 0 | 0 | 294  | 3  |        |          |          |  | no  |                              | Apoplastic     | 0.81 |
| Vna4.60  | hypothetical protein VDBG_05012 [Verticillium alfalfae VaMs.102]               | 100   | 1E-134 | yes | yes | extr 27                                         | 0 | 0 | 203  | 0  |        |          |          |  | no  |                              | Apoplastic     | 0.65 |
| Vna4.61  | conserved hypothetical protein VDBG_05011 [Verticillium alfalfae VaMs.102]     | 97.81 | 5E-127 | yes | yes | extr 26                                         | 0 | 0 | 184  | 7  |        |          |          |  | no  |                              | Apoplastic     | 0.88 |
| Vna4.62  | antigen 1 VDBG_05009 [Verticillium alfalfae VaMs.102]                          | 99.33 | 0      | yes | yes | extr 26                                         | 0 | 0 | 297  | 8  |        |          |          |  | no  |                              | Non-apoplastic | 0.53 |
| Vna4.63  | hypothetical protein BN1708_016263 [Verticillium longisporum]                  | 97.52 | 3E-173 | yes | yes | extr 25                                         | 0 | 0 | 256  | 6  |        |          |          |  | no  |                              | Non-apoplastic | 0.53 |
| Vna4.88  | UVI-1 protein [Verticillium dahliae VdLs.17] EGY23092                          | 90.34 | 2E-122 | yes | yes | extr 17, cyto 4, mito 3, vacu 2, cyto_pero 2    | 0 | 0 | 188  | 1  |        |          |          |  | yes |                              | Non-apoplastic | 0.57 |
| Vna4.94  | hypothetical protein VDAG_04524 [Verticillium dahliae VdLs.17]                 | 94.89 | 0      | yes | yes | extr 19, E.R. 4, plas 2                         | 1 | 1 | 602  | 8  |        |          |          |  | no  |                              | Non-apoplastic | 0.73 |
| Vna4.125 | conserved hypothetical protein VDBG_04902 [Verticillium alfalfae VaMs.102]     | 91.13 | 0      | yes | yes | cyto 7.5, cyto_nucl 6.5, extr 6, mito 5, nucl 4 | 0 | 0 | 534  | 10 |        |          |          |  | no  |                              | Non-apoplastic | 0.98 |
| Vna4.126 | hypothetical protein BN1723_013336 [Verticillium longisporum]                  | 95.45 | 2E-126 | yes | yes | extr 27                                         | 0 | 0 | 335  | 7  |        |          |          |  | no  |                              | Apoplastic     | 0.74 |
| Vna4.130 | hypothetical protein BN1708_002438, partial [Verticillium longisporum]         | 87.61 | 8E-91  | yes | yes | extr 23, mito 3                                 | 0 | 1 | 216  | 0  |        |          |          |  | no  |                              | Apoplastic     | 0.76 |
| Vna4.135 | hypothetical protein BN1708_002445 [Verticillium longisporum]                  | 98.17 | 1E-68  | yes | yes | extr 19, E.R. 3, golg 3                         | 0 | 0 | 188  | 19 | 1.71   | 0        | 0        |  | no  |                              | Apoplastic     | 0.68 |
| Vna4.136 | hypothetical protein BN1708_002446 [Verticillium longisporum]                  | 97.59 | 7E-112 | yes | yes | extr 18, cyto_nucl 4, nucl 3.5, cyto 3.5        | 0 | 0 | 187  | 0  |        |          |          |  | no  |                              | Non-apoplastic | 0.52 |
| Vna4.159 | predicted protein VDBG_04855 [Verticillium alfalfae VaMs.102]                  | 99.06 | 4E-126 | yes | yes | extr 19, mito 8                                 | 0 | 0 | 386  | 2  |        |          |          |  | no  |                              | Apoplastic     | 0.74 |
| Vna4.188 | endosomal protein P24B [Verticillium dahliae VdLs.17] EGY22928                 | 99.51 | 4E-149 | yes | yes | extr 12, cyto_nucl 5.833, cyto 5.5, cyto_mito   | 0 | 1 | 203  | 2  |        |          |          |  | no  |                              | Non-apoplastic | 0.82 |
| Vna4.205 | DJ-1/Pip1 family protein [Verticillium dahliae VdLs.17] EGY22910               | 99.4  | 5E-115 | yes | yes | extr 24, cyto 2                                 | 0 | 0 | 258  | 2  | -17.19 | 1.89E-20 | 1.68E-18 |  | no  |                              | Non-apoplastic | 0.51 |
| Vna4.210 | mixed-linked glucanase VDBG_04804 [Verticillium alfalfae VaMs.102]             | 99.37 | 0      | yes | yes | extr 26                                         | 0 | 0 | 316  | 8  |        |          |          |  | no  |                              | Apoplastic     | 0.78 |
| Vna4.216 | alpha-N-arabinofuranosidase VDBG_04797 [Verticillium alfalfae VaMs.102]        | 97.64 | 0      | yes | yes | extr 26                                         | 0 | 0 | 509  | 11 |        |          |          |  | no  |                              | Apoplastic     | 0.8  |
| Vna4.220 | dextranase VDBG_04792 [Verticillium alfalfae VaMs.102]                         | 97.84 | 0      | yes | yes | extr 17, mito 5, cyto 3, cyto_pero 2.833, cyto  | 0 | 0 | 601  | 4  |        |          |          |  | no  |                              | Non-apoplastic | 0.7  |
| Vna4.230 | acetylcholinesterase [Verticillium dahliae VdLs.17] EGY22884                   | 68.34 | 0      | yes | yes | extr 22, mito 2, cyto_nucl 1, pero 1, vacu 1    | 0 | 0 | 543  | 10 |        |          |          |  | no  | Chloroplast (0.986   53-80)  | Non-apoplastic | 0.7  |
| Vna4.245 | hypothetical protein BN1723_001886 [Verticillium longisporum]                  | 76.35 | 5E-106 | yes | yes | extr 25                                         | 0 | 0 | 256  | 1  |        |          |          |  | no  |                              | Apoplastic     | 0.73 |
| Vna4.259 | hypothetical protein VDAG_04291 [Verticillium dahliae VdLs.17]                 | 90.04 | 2E-141 | yes | yes | extr 25                                         | 0 | 0 | 376  | 5  |        |          |          |  | no  |                              | Apoplastic     | 0.67 |
| Vna4.287 | hypothetical protein BN1723_004292, partial [Verticillium longisporum]         | 83.18 | 0      | yes | yes | extr 26                                         | 0 | 0 | 430  | 2  |        |          |          |  | no  |                              | Apoplastic     | 0.81 |
| Vna4.313 | aminopeptidase Y VDBG_04691 [Verticillium alfalfae VaMs.102]                   | 99.39 | 0      | yes | yes | extr 16, cyto 6, mito 5                         | 0 | 0 | 495  | 4  |        |          |          |  | no  |                              | Non-apoplastic | 0.6  |
| Vna4.316 | conserved hypothetical protein VDBG_04687 [Verticillium alfalfae VaMs.102]     | 98.09 | 8E-108 | yes | yes | extr 25                                         | 0 | 0 | 157  | 10 |        |          |          |  | no  |                              | Apoplastic     | 0.55 |
| Vna4.363 | hypothetical protein VDAG_04177 [Verticillium dahliae VdLs.17]                 | 36    | 5E-61  | yes | yes | extr 13, mito 9, nucl 2, cyto 2, cyto_nucl 2    | 1 | 1 | 481  | 17 |        |          |          |  | no  |                              | Apoplastic     | 0.59 |
| Vna4.382 | hypothetical protein VDAG_04155 [Verticillium dahliae VdLs.17]                 | 97.14 | 9E-133 | yes | yes | extr 20                                         | 0 | 0 | 279  | 3  |        |          |          |  | no  |                              | Apoplastic     | 0.78 |
| Vna4.404 | hypothetical protein BN1708_013402 [Verticillium longisporum]                  | 78.4  | 0      | yes | yes | cyto 10.5, E.R. 7, cyto_nucl 6, extr 3, mito 2  | 1 | 1 | 566  | 4  |        |          |          |  | no  |                              | Non-apoplastic | 0.8  |
| Vna4.406 | hypothetical protein BN1708_008614 [Verticillium longisporum]                  | 89.9  | 6E-92  | yes | yes | extr 27                                         | 0 | 1 | 198  | 8  |        |          |          |  | no  |                              | Apoplastic     | 0.89 |
| Vna4.410 | hypothetical protein VDAG_04121 [Verticillium dahliae VdLs.17]                 | 72.55 | 0      | yes | yes | extr 15, mito 9, cyto 3                         | 0 | 0 | 601  | 2  |        |          |          |  | no  |                              | Non-apoplastic | 0.96 |
| Vna4.414 | hypothetical protein BN1708_013410 [Verticillium longisporum]                  | 64.52 | 0      | yes | yes | extr 21, mito 5                                 | 0 | 0 | 434  | 1  |        |          |          |  | no  | Mitochondria (0.985   68-89) | Apoplastic     | 0.65 |
| Vna4.420 | predicted protein VDBG_04564 [Verticillium alfalfae VaMs.102]                  | 99.42 | 0      | yes | yes | extr 19, mito 3, vacu 3                         | 0 | 0 | 343  | 2  |        |          |          |  | no  |                              | Non-apoplastic | 0.9  |
| Vna4.421 | hypothetical protein BN1708_006453 [Verticillium longisporum]                  | 98.23 | 0      | yes | yes | cyto 10, extr 8, mito 7                         | 0 | 0 | 693  | 21 |        |          |          |  | no  |                              | Non-apoplastic | 0.78 |
| Vna4.427 | hypothetical protein BN1708_007592, partial [Verticillium longisporum]         | 87.27 | 0      | yes | yes | extr 9, cyto 6, nucl 5, cyto_pero 5             | 0 | 0 | 330  | 6  |        |          |          |  | no  |                              | Non-apoplastic | 0.85 |
| Vna4.428 | glucan endo-1,3-alpha-glucosidase agn1 [Verticillium dahliae VdLs.17] EGY22663 | 88.21 | 0      | yes | yes | extr 25                                         | 1 | 0 | 1124 | 33 |        |          |          |  | no  |                              | Non-apoplastic | 0.5  |
| Vna4.440 | hypothetical protein BN1723_015558 [Verticillium longisporum]                  | 71.66 | 0      | yes | yes | extr 15, plas 7, E.R. 4                         | 1 | 1 | 490  | 1  |        |          |          |  | no  |                              | Non-apoplastic | 0.83 |
| Vna4.443 | hypothetical protein BN1723_000281 [Verticillium longisporum]                  | 96.35 | 4E-88  | yes | yes | extr 12, cyto 5.5, cyto_nucl 4, pero 3, E.R. 3  | 0 | 0 | 340  | 5  |        |          |          |  | no  |                              | Non-apoplastic | 0.77 |
| Vna4.459 | hypothetical protein BN1708_004875 [Verticillium longisporum]                  | 85.1  | 0      | yes | yes | extr 12, E.R. 5, golg 4, vacu 3, cyto 2.5       | 0 | 0 | 717  | 22 |        |          |          |  | no  |                              | Non-apoplastic | 0.93 |
| Vna4.463 | hypothetical protein BN1723_011134 [Verticillium longisporum]                  | 99.1  | 1E-154 | yes | yes | extr 25                                         | 0 | 0 | 457  | 10 |        |          |          |  | no  |                              | Apoplastic     | 0.9  |
| Vna4.466 | hypothetical protein BN1708_007639 [Verticillium longisporum]                  | 99.35 | 0      | yes | yes | extr 24, mito 3                                 | 0 | 0 | 1144 | 49 |        |          |          |  | no  |                              | Apoplastic     | 0.76 |
| Vna4.469 | conserved hypothetical protein VDBG_04511 [Verticillium alfalfae VaMs.102]     | 99.49 | 0      | yes | yes | extr 16, cyto 3, mito 2, plas 2, pero 2         | 1 | 1 | 583  | 5  |        |          |          |  | no  |                              | Non-apoplastic | 0.64 |
| Vna4.479 | hypothetical protein BN1708_017370 [Verticillium longisporum]                  | 95.24 | 1E-44  | yes | yes | extr 17, mito 5, E.R. 3, cyto_mito 3            | 0 | 0 | 105  | 3  |        |          |          |  | no  |                              | Non-apoplastic | 0.74 |
| Vna4.489 | hypothetical protein BN1723_014050 [Verticillium longisporum]                  | 99.63 | 0      | yes | yes | extr 27                                         | 0 | 0 | 660  | 2  |        |          |          |  | yes |                              | Apoplastic     | 0.86 |
| Vna4.499 | cAMP-regulated D2 protein VDBG_04467 [Verticillium alfalfae VaMs.102]          | 99.29 | 0      | yes | yes | extr 24, cyto 1.5, cyto_nucl 1.5                | 0 | 0 | 701  | 13 | -3.64  | 1.42E-68 | 1.71E-66 |  | no  |                              | Non-apoplastic | 0.54 |
| Vna4.515 | endopolyphosphatase [Verticillium dahliae VdLs.17] EGY18455                    | 94.89 | 0      | yes | yes | mito 9.5, mito_nucl 8.166, cyto_mito 7.833,     | 0 | 0 | 802  | 4  |        |          |          |  | no  |                              | Non-apoplastic | 0.96 |
| Vna4.573 | hypothetical protein BN1708_001113 [Verticillium longisporum]                  | 98.84 | 1E-121 | yes | yes | extr 18, E.R. 4, plas 3                         | 0 | 0 | 247  | 5  |        |          |          |  | no  |                              | Non-apoplastic | 0.58 |
| Vna4.574 | hypothetical protein BN1708_001116 [Verticillium longisporum]                  | 99.37 | 0      | yes | yes | extr 21, golg 3, mito 1, E.R. 1, vacu 1         | 0 | 1 | 493  | 14 |        |          |          |  | no  | Mitochondria (0.99   51-71)  | Non-apoplastic | 0.58 |
| Vna4.640 | oxidoreductase VDBG_09266 [Verticillium alfalfae VaMs.102]                     | 100   | 0      | yes | yes | extr 12, mito 7, E.R. 5, cyto 2                 | 0 | 0 | 451  | 4  |        |          |          |  | no  |                              | Non-apoplastic | 0.99 |
| Vna4.642 | carbonic anhydrase VDBG_09264 [Verticillium alfalfae VaMs.102]                 | 98.89 | 0      | yes | yes | extr 20, mito 3, cyto 1, plas 1, pero 1, vacu 1 | 0 | 0 | 271  | 3  | 6.75   | 7.68E-14 | 4.84E-12 |  | no  | Chloroplast (0.999   67-87)  | Non-apoplastic | 0.5  |
| Vna4.650 | hypothetical protein BN1708_012179, partial [Verticillium longisporum]         | 85.21 | 0      | yes | yes | extr 25                                         | 0 | 0 | 391  | 6  |        |          |          |  | no  |                              | Non-apoplastic | 0.58 |
| Vna4.654 | carboxypeptidase Y inhibitor VDBG_09250 [Verticillium alfalfae VaMs.102]       | 99.06 | 5E-151 | yes | yes | extr 24, cyto 2                                 | 0 | 0 | 213  | 1  | -4.67  | 1.05E-38 | 1.06E-36 |  | no  |                              | Apoplastic     | 0.56 |
| Vna4.655 | hypothetical protein BN1708_012184 [Verticillium longisporum]                  | 90.6  | 4E-162 | yes | yes | extr 27                                         | 0 | 0 | 319  | 10 |        |          |          |  | no  | Chloroplast (0.709   59-94)  | Apoplastic     | 0.87 |
| Vna4.667 | conserved hypothetical protein VDBG_09236 [Verticillium alfalfae VaMs.102]     | 91.42 | 3E-162 | yes | yes | extr 22, plas 2, mito 1, E.R. 1, vacu 1         | 0 | 0 | 307  | 7  |        |          |          |  | no  |                              | Apoplastic     | 0.57 |
| Vna4.669 | predicted protein VDBG_09234 [Verticillium alfalfae VaMs.102]                  | 99.13 | 7E-77  | yes | yes | extr 23, mito 3                                 | 0 | 0 | 115  | 5  |        |          |          |  | no  |                              | Apoplastic     | 0.77 |
| Vna4.673 | predicted protein VDBG_09228 [Verticillium alfalfae VaMs.102]                  | 98    | 3E-136 | yes | yes | extr 8, cyto 5, E.R. 4, cyto_mito 4, mito 3, pl | 0 | 0 | 200  | 2  |        |          |          |  | no  |                              | Non-apoplastic | 0.84 |
| Vna4.680 | hypothetical protein VDAG_07374 [Verticillium dahliae VdLs.17]                 | 89.88 | 0      | yes | yes | extr 11, mito 5, cyto 4, vacu 3, cyto_pero 3    | 0 | 0 | 404  | 9  |        |          |          |  | no  |                              | Non-apoplastic | 0.75 |
| Vna4.681 | hypothetical protein BN1708_012113 [Verticillium longisporum]                  | 96.61 | 0      | yes | yes | extr 26                                         | 0 | 0 | 902  | 3  |        |          |          |  | no  |                              | Non-apoplastic | 0.52 |
| Vna4.683 | predicted protein VDBG_09216 [Verticillium alfalfae VaMs.102]                  | 88.03 | 7E-130 | yes | yes | cyto 6.5, cyto_nucl 6, nucl 4.5, mito 4, extr 4 | 0 | 0 | 368  | 6  |        |          |          |  | no  |                              | Non-apoplastic | 0.69 |
| Vna4.686 | hypothetical protein BN1708_016216, partial [Verticillium longisporum]         | 50.81 | 0      | yes | yes | extr 22, mito 3                                 | 0 | 0 | 923  | 4  |        |          |          |  | no  |                              | Non-apoplastic | 0.58 |

|                 |                                                                                        |       |        |     |     |                                                 |   |     |      |     |       |          |          |    |     |                              |                |      |
|-----------------|----------------------------------------------------------------------------------------|-------|--------|-----|-----|-------------------------------------------------|---|-----|------|-----|-------|----------|----------|----|-----|------------------------------|----------------|------|
| <b>Vna4.688</b> | conserved hypothetical protein VDBG_09208 [Verticillium alfalfae VaMs.102]             | 98.8  | 2E-114 | yes | yes | extr 16, mito 4, plas 4, E.R. 2, cyto_mito 2, r | 0 | 0   | 166  | 1   |       |          |          |    | no  |                              | Non-apoplastic | 0.61 |
| <b>Vna4.699</b> | hypothetical protein VDAG_07353 [Verticillium dahliae VdLs.17]                         | 98.85 | 3E-117 | yes | yes | plas 14, E.R. 6, extr 4, mito 2                 | 1 | 1   | 442  | 1   |       |          |          |    | no  |                              | Non-apoplastic | 0.54 |
| <b>Vna4.701</b> | pectate lyase L [Verticillium dahliae VdLs.17] EGY16186                                | 98.5  | 0      | yes | yes | extr 26                                         | 0 | 0   | 399  | 1   | 2.25  | 3.81E-09 | 1.39E-07 |    | no  |                              | Apoplastic     | 0.68 |
| <b>Vna4.702</b> | hypothetical protein BN1708_006960 [Verticillium longisporum]                          | 93.25 | 0      | yes | 1   | extr 11, E.R. 7, golg 4, vacu 3                 | 0 | 0   | 853  | 172 |       |          |          |    | no  |                              | Non-apoplastic | 0.5  |
| <b>Vna4.726</b> | carboxypeptidase cpdS VDBG_09155 [Verticillium alfalfae VaMs.102]                      | 99.27 | 0      | yes | yes | extr 22, vacu 2, nucl 1, mito 1, golg 1, mito   | 0 | 0   | 550  | 7   | -3.18 | 4.23E-14 | 2.72E-12 |    | no  |                              | Apoplastic     | 0.63 |
| <b>Vna4.727</b> | glycoside hydrolase VDBG_09154 [Verticillium alfalfae VaMs.102]                        | 98.96 | 0      | yes | yes | extr 27                                         | 0 | 0   | 481  | 2   |       |          |          |    | no  |                              | Apoplastic     | 0.73 |
| <b>Vna4.736</b> | sulphydryl oxidase VDBG_09145 [Verticillium alfalfae VaMs.102]                         | 99.26 | 0      | yes | yes | extr 22, E.R. 4                                 | 0 | 0   | 407  | 2   | 2.00  | 4.91E-14 | 3.14E-12 |    | no  | Mitochondria (0.99   49-72)  | Non-apoplastic | 0.89 |
| <b>Vna4.737</b> | predicted protein VDBG_09144 [Verticillium alfalfae VaMs.102]                          | 75.91 | 8E-114 | yes | yes | extr 20, mito 5                                 | 0 | 0   | 256  | 6   |       |          |          |    | no  |                              | Non-apoplastic | 0.52 |
| <b>Vna4.741</b> | zinc carboxypeptidase A VDBG_09139 [Verticillium alfalfae VaMs.102]                    | 99.76 | 0      | yes | yes | extr 22, mito 2, cyto 2, cyto_mito 2            | 0 | 0   | 415  | 4   |       |          |          |    | no  |                              | Apoplastic     | 0.74 |
| <b>Vna4.742</b> | hypothetical protein BN1708_007399 [Verticillium longisporum]                          | 34.76 | 7E-42  | yes | yes | 0                                               | 0 | 300 | 10   |     |       |          |          | no |     | Apoplastic                   | 0.78           |      |
| <b>Vna4.748</b> | hypothetical protein BN1708_007403 [Verticillium longisporum]                          | 99.69 | 0      | yes | yes | extr 26                                         | 0 | 0   | 492  | 6   |       |          |          |    | yes |                              | Apoplastic     | 0.75 |
| <b>Vna4.756</b> | hypothetical protein BN1723_004140 [Verticillium longisporum]                          | 54.82 | 5E-72  | yes | yes | extr 12, plas 4, mito 3, cyto 3, cyto_mito 3    | 0 | 0   | 200  | 0   |       |          |          |    | no  |                              | Non-apoplastic | 0.72 |
| <b>Vna4.758</b> | hypothetical protein BN1723_004143 [Verticillium longisporum]                          | 64.18 | 1E-46  | yes | yes | extr 24, nucl 2.5                               | 0 | 0   | 129  | 8   |       |          |          |    | no  |                              | Apoplastic     | 0.78 |
| <b>Vna4.761</b> | hypothetical protein BN1723_010903 [Verticillium longisporum]                          | 37.45 | 6E-25  | yes | yes | extr 22, E.R. 2, mito 1, plas 1, pero 1         | 0 | 0   | 186  | 8   |       |          |          |    | no  |                              | Non-apoplastic | 0.71 |
| <b>Vna4.817</b> | hypothetical protein BN1708_001182 [Verticillium longisporum]                          | 97.46 | 1E-163 | yes | yes | extr 27                                         | 0 | 0   | 236  | 14  |       |          |          |    | yes |                              | Apoplastic     | 0.82 |
| <b>Vna4.818</b> | choline dehydrogenase [Verticillium dahliae VdLs.17] EGY16102                          | 90.69 | 0      | yes | yes | extr 27                                         | 0 | 0   | 616  | 6   | -2.68 | 1.16E-12 | 6.68E-11 |    | yes |                              | Non-apoplastic | 0.53 |
| <b>Vna4.820</b> | hypothetical protein BN1723_004151 [Verticillium longisporum]                          | 92.2  | 0      | yes | yes | extr 21, cyto 2.5, cyto_nucl 2, pero 2          | 0 | 0   | 577  | 14  |       |          |          |    | no  |                              | Non-apoplastic | 0.62 |
| <b>Vna4.832</b> | amine oxidase VDBG_09103 [Verticillium alfalfae VaMs.102]                              | 93.31 | 0      | yes | yes | extr 22, golg 3                                 | 0 | 0   | 518  | 3   |       |          |          |    | no  |                              | Non-apoplastic | 0.9  |
| <b>Vna4.839</b> | predicted protein VDBG_09091 [Verticillium alfalfae VaMs.102]                          | 95.91 | 2E-159 | yes | yes | extr 19, vacu 3, mito 2, pero 2                 | 0 | 0   | 220  | 10  |       |          |          |    | no  |                              | Non-apoplastic | 0.57 |
| <b>Vna4.842</b> | hypothetical protein BN1708_012285, partial [Verticillium longisporum]                 | 75.91 | 0      | yes | yes | extr 27                                         | 0 | 0   | 377  | 6   |       |          |          |    | no  |                              | Apoplastic     | 0.94 |
| <b>Vna4.843</b> | hydroxyacid oxidase VDBG_09087 [Verticillium alfalfae VaMs.102]                        | 99.21 | 0      | yes | yes | extr 18, mito 5, cyto 4                         | 0 | 0   | 382  | 1   | 3.00  |          | 0        | 0  | no  |                              | Non-apoplastic | 0.58 |
| <b>Vna4.844</b> | predicted protein VDBG_09086 [Verticillium alfalfae VaMs.102]                          | 98.08 | 1E-110 | yes | yes | extr 23, mito 2, cyto 1.5, cyto_nucl 1.5        | 0 | 0   | 156  | 6   | -5.06 | 4.25E-12 | 2.26E-10 |    | no  | Chloroplast (0.964   90-111) | Non-apoplastic | 0.52 |
| <b>Vna4.853</b> | iron transport multicopper oxidase FET3 [Verticillium dahliae VdLs.17] EGY16062        | 98.68 | 0      | yes | yes | extr 26                                         | 1 | 1   | 593  | 5   |       |          |          |    | no  |                              | Non-apoplastic | 0.71 |
| <b>Vna4.854</b> | cutinase VDBG_09076 [Verticillium alfalfae VaMs.102]                                   | 99.57 | 3E-162 | yes | yes | extr 16, cyto 6, mito 4                         | 0 | 0   | 230  | 4   | 1.64  | 5.23E-09 | 1.87E-07 |    | no  |                              | Non-apoplastic | 0.51 |
| <b>Vna4.856</b> | metal dependent amidohydrolase VDBG_09074 [Verticillium alfalfae VaMs.102]             | 99.57 | 0      | yes | yes | cyto 10, mito 9, extr 8                         | 0 | 0   | 476  | 10  |       |          |          |    | no  |                              | Non-apoplastic | 0.55 |
| <b>Vna4.857</b> | hypothetical protein BN1708_015989, partial [Verticillium longisporum]                 | 86.67 | 0      | yes | yes | extr 22, cyto 3                                 | 1 | 0   | 375  | 4   | 1.64  | 2.05E-07 | 5.49E-06 |    | no  |                              | Apoplastic     | 0.67 |
| <b>Vna4.863</b> | pyrimidine precursor biosynthesis enzyme THI11 [Verticillium dahliae VdLs.17] EGY16047 | 99.71 | 0      | yes | yes | extr 13, E.R. 6, cyto 4, golg 2, cyto_pero 2    | 0 | 0   | 655  | 11  |       |          |          |    | no  |                              | Non-apoplastic | 0.97 |
| <b>Vna4.864</b> | exoglucanase-6A [Verticillium dahliae VdLs.17] EGY16046                                | 98.06 | 0      | yes | yes | extr 27                                         | 0 | 0   | 480  | 11  |       |          |          |    | yes |                              | Apoplastic     | 0.79 |
| <b>Vna4.869</b> | hypothetical protein BN1708_011923, partial [Verticillium longisporum]                 | 97.95 | 0      | yes | yes | extr 7, mito 6, cyto 6, cyto_mito 6             | 0 | 0   | 353  | 2   |       |          |          |    | no  |                              | Non-apoplastic | 0.58 |
| <b>Vna4.880</b> | hypothetical protein VDBG_09043 [Verticillium alfalfae VaMs.102]                       | 100   | 2E-125 | yes | 0   | extr 24, mito 1, golg 1, vacu 1                 | 0 | 0   | 192  | 8   | -7.67 | 6.09E-12 | 3.14E-10 |    | no  |                              | Apoplastic     | 0.68 |
| <b>Vna4.881</b> | 1,3-beta-glucanosyltransferase gel4 VDBG_09042 [Verticillium alfalfae VaMs.102]        | 99.63 | 0      | yes | yes | extr 26                                         | 1 | 1   | 541  | 14  |       |          |          |    | yes |                              | Apoplastic     | 0.72 |
| <b>Vna4.890</b> | glucan 1,3-beta-glucosidase [Verticillium dahliae VdLs.17] EGY16021                    | 63.66 | 4E-149 | yes | yes | extr 17, plas 10                                | 0 | 0   | 357  | 3   |       |          |          |    | no  |                              | Apoplastic     | 0.75 |
| <b>Vna4.892</b> | peptidase M14 VDBG_09029 [Verticillium alfalfae VaMs.102]                              | 99.78 | 0      | yes | 0   | extr 23, cyto 2                                 | 0 | 0   | 445  | 7   |       |          |          |    | no  |                              | Apoplastic     | 0.58 |
| <b>Vna4.899</b> | hypothetical protein BN1708_012249 [Verticillium longisporum]                          | 95.74 | 0      | yes | yes | extr 26                                         | 0 | 0   | 399  | 0   |       |          |          |    | no  |                              | Apoplastic     | 0.81 |
| <b>Vna4.912</b> | glucanase B VDBG_10164 [Verticillium alfalfae VaMs.102]                                | 97.7  | 0      | yes | yes | extr 27                                         | 0 | 0   | 434  | 6   |       |          |          |    | no  |                              | Apoplastic     | 0.69 |
| <b>Vna4.913</b> | conserved hypothetical protein VDBG_10163 [Verticillium alfalfae VaMs.102]             | 96.89 | 4E-139 | yes | 0   | extr 25                                         | 0 | 0   | 257  | 1   | -1.53 | 1.03E-06 | 2.35E-05 |    | no  |                              | Apoplastic     | 0.59 |
| <b>Vna4.914</b> | subtilisin Carlsberg [Verticillium dahliae VdLs.17] EGY21492                           | 81.98 | 0      | yes | yes | extr 22, cyto 2, pero 1, E.R. 1, golg 1, cyto_n | 0 | 0   | 1130 | 5   |       |          |          |    | no  |                              | Non-apoplastic | 0.54 |
| <b>Vna5.8</b>   | hypothetical protein VDAG_04057 [Verticillium dahliae VdLs.17]                         | 76.71 | 0      | yes | yes | extr 24, mito 2                                 | 0 | 0   | 425  | 10  |       |          |          |    | no  |                              | Apoplastic     | 0.76 |
| <b>Vna5.18</b>  | hypothetical protein BN1708_001454 [Verticillium longisporum]                          | 35.98 | 4E-28  | yes | yes | extr 27                                         | 0 | 1   | 347  | 8   |       |          |          |    | no  |                              | Apoplastic     | 0.81 |
| <b>Vna5.59</b>  | hypothetical protein BN1723_008393 [Verticillium longisporum]                          | 99.06 | 0      | yes | yes | extr 24, plas 1, pero 1, E.R. 1                 | 1 | 1   | 592  | 4   | 1.94  | 0        | 0        |    | no  |                              | Non-apoplastic | 0.73 |
| <b>Vna5.64</b>  | hypothetical protein BN1723_008390, partial [Verticillium longisporum]                 | 54.83 | 6E-156 | yes | yes | extr 27                                         | 0 | 0   | 397  | 1   |       |          |          |    | no  |                              | Non-apoplastic | 0.55 |
| <b>Vna5.97</b>  | endoglucanase-4 VDBG_01593 [Verticillium alfalfae VaMs.102] EGY19943                   | 99.18 | 4E-176 | yes | yes | extr 27                                         | 0 | 0   | 245  | 3   |       |          |          |    | no  |                              | Apoplastic     | 0.92 |
| <b>Vna5.144</b> | thaumatin family protein VDBG_01642 [Verticillium alfalfae VaMs.102]                   | 97.97 | 0      | yes | yes | extr 23, mito 2                                 | 0 | 1   | 396  | 15  | 1.55  | 1.54E-07 | 4.19E-06 |    | no  |                              | Apoplastic     | 0.59 |
| <b>Vna5.149</b> | hypothetical protein BN1708_000007 [Verticillium longisporum]                          | 82.08 | 2E-57  | yes | yes | extr 25                                         | 0 | 0   | 168  | 8   |       |          |          |    | no  | Chloroplast (0.922   81-102) | Apoplastic     | 0.81 |
| <b>Vna5.152</b> | hypothetical protein BN1708_000004 [Verticillium longisporum]                          | 96.3  | 4E-64  | yes | 1   | extr 17, mito 4, cyto 2, pero 2, cyto_pero 2    | 1 | 1   | 277  | 3   |       |          |          |    | no  |                              | Non-apoplastic | 0.72 |
| <b>Vna5.176</b> | hypothetical protein BN1723_014650 [Verticillium longisporum]                          | 37.24 | 3E-19  | yes | yes | extr 20, mito 6                                 | 1 | 1   | 365  | 13  |       |          |          |    | no  |                              | Apoplastic     | 0.61 |
| <b>Vna5.187</b> | hypothetical protein BN1708_013606, partial [Verticillium longisporum]                 | 78.02 | 1E-104 | yes | yes | extr 26                                         | 0 | 0   | 279  | 7   | 2.09  | 0        | 0        |    | no  |                              | Apoplastic     | 0.71 |
| <b>Vna5.188</b> | hypothetical protein BN1723_003413 [Verticillium longisporum]                          | 82.85 | 0      | yes | 0   | extr 27                                         | 0 | 0   | 820  | 3   |       |          |          |    | yes |                              | Non-apoplastic | 0.58 |
| <b>Vna5.189</b> | predicted protein VDBG_01684 [Verticillium alfalfae VaMs.102]                          | 99.68 | 0      | yes | yes | extr 25                                         | 0 | 1   | 309  | 0   |       |          |          |    | no  |                              | Apoplastic     | 0.67 |
| <b>Vna5.190</b> | hypothetical protein BN1708_013612 [Verticillium longisporum]                          | 82.79 | 0      | yes | yes | extr 13, nucl 4, golg 4, E.R. 3, mito 1, cyto 1 | 0 | 0   | 2584 | 6   |       |          |          |    | no  |                              | Non-apoplastic | 0.99 |
| <b>Vna5.198</b> | conserved hypothetical protein VDBG_01694 [Verticillium alfalfae VaMs.102]             | 99.17 | 0      | yes | yes | plas 10, mito 6, extr 6, cyto 2, E.R. 2         | 1 | 1   | 363  | 7   |       |          |          |    | no  |                              | Non-apoplastic | 0.94 |
| <b>Vna5.201</b> | SnodProt1 VDBG_01697 [Verticillium alfalfae VaMs.102]                                  | 98.55 | 1E-93  | yes | yes | extr 21, mito 3, cyto 2.5                       | 0 | 0   | 138  | 4   |       |          |          |    | no  |                              | Apoplastic     | 0.73 |
| <b>Vna5.216</b> | hypothetical protein BN1708_002690 [Verticillium longisporum]                          | 79.61 | 3E-82  | yes | yes | extr 25                                         | 0 | 0   | 153  | 11  |       |          |          |    | no  |                              | Apoplastic     | 0.92 |
| <b>Vna5.217</b> | hypothetical protein BN1708_004284 [Verticillium longisporum]                          | 89    | 0      | yes | yes | extr 20, cyto 6, cyto_nucl 3.833, cyto_mito 3   | 0 | 0   | 339  | 10  |       |          |          |    | no  |                              | Apoplastic     | 0.57 |
| <b>Vna5.235</b> | hypothetical protein BN1708_004264 [Verticillium longisporum]                          | 94.01 | 0      | yes | yes | extr 27                                         | 0 | 0   | 374  | 2   |       |          |          |    | no  |                              | Apoplastic     | 0.77 |
| <b>Vna5.255</b> | ankyrin-1 VDBG_01754 [Verticillium alfalfae VaMs.102]                                  | 96.26 | 0      | yes | yes | plas 11, cyto 4, mito 3, cyto_nucl 3, cyto_per  | 0 | 0   | 1762 | 40  |       |          |          |    | no  |                              | Non-apoplastic | 0.89 |
| <b>Vna5.267</b> | pectinesterase family protein [Verticillium dahliae VdLs.17] EGY19766                  | 92.56 | 0      | yes | yes | extr 27                                         | 0 | 0   | 420  | 6   |       |          |          |    | no  |                              | Apoplastic     | 0.75 |
| <b>Vna5.268</b> | polygalacturonase [Verticillium dahliae VdLs.17] EGY19765                              | 92.43 | 0      | yes | yes | extr 25                                         | 0 | 0   | 436  | 13  |       |          |          |    | no  |                              | Non-apoplastic | 0.54 |
| <b>Vna5.288</b> | hypothetical protein BN1723_002554, partial [Verticillium longisporum]                 | 49.42 | 5E-98  | yes | 0   | cyto 10, extr 9, nucl 5, cyto_pero 5            | 0 | 0   | 354  | 6   |       |          |          |    | no  |                              | Non-apoplastic | 0.94 |
| <b>Vna5.290</b> | hypothetical protein BN1708_013852 [Verticillium longisporum]                          | 47.3  | 8E-167 | yes | yes | extr 25                                         | 0 | 1   | 696  | 21  |       |          |          |    | no  |                              | Apoplastic     | 0.71 |
| <b>Vna5.325</b> | acetylxyylan esterase [Verticillium dahliae VdLs.17] EGY19701                          | 98.14 | 0      | yes | yes | extr 27                                         | 0 | 0   | 429  | 3   | 1.51  | 8.86E-07 | 2.08E-05 |    | no  |                              | Apoplastic     | 0.56 |
| <b>Vna5.328</b> | hypothetical protein BN1708_014717 [Verticillium longisporum]                          | 91.32 | 7E-157 | yes | yes | extr 13, plas 10, mito 2, E.R. 2                | 0 | 0   | 307  | 4   |       |          |          |    | no  |                              | Non-apoplastic | 0.76 |



|          |                                                                                           |       |        |     |     |                                                 |   |   |      |    |        |          |          |     |                              |                |      |
|----------|-------------------------------------------------------------------------------------------|-------|--------|-----|-----|-------------------------------------------------|---|---|------|----|--------|----------|----------|-----|------------------------------|----------------|------|
| Vna5.337 | conserved hypothetical protein VDBG_01849 [Verticillium alfalfae VaMs.102]                | 98.76 | 0      | yes | yes | extr 19, plas 3, E.R. 3                         | 0 | 0 | 403  | 7  |        |          |          | no  |                              | Non-apoplastic | 0.68 |
| Vna5.345 | FAD/FMN-containing dehydrogenase [Verticillium dahliae VdLs.17] EGY19682                  | 86.31 | 0      | yes | yes | extr 11, cyto 5, nucl 4, cyto_pero 4, pero 3, n | 0 | 0 | 504  | 3  |        |          |          | no  |                              | Non-apoplastic | 0.8  |
| Vna5.349 | ferulic acid esterase A VDBG_01861 [Verticillium alfalfae VaMs.102]                       | 98.52 | 0      | yes | yes | extr 27                                         | 0 | 0 | 337  | 12 |        |          |          | no  |                              | Apoplastic     | 0.71 |
| Vna5.351 | endoglucanase [Verticillium dahliae VdLs.17] EGY19676                                     | 63.84 | 0      | yes | yes | extr 27                                         | 0 | 0 | 401  | 6  |        |          |          | yes |                              | Apoplastic     | 0.83 |
| Vna5.356 | hypothetical protein BN1708_001049 [Verticillium longisporum]                             | 79.52 | 2E-147 | yes | yes | extr 25                                         | 0 | 0 | 293  | 6  |        |          |          | yes |                              | Apoplastic     | 0.77 |
| Vna5.362 | hypothetical protein BN1708_001054 [Verticillium longisporum]                             | 89.25 | 1E-111 | yes | yes | plas 12, extr 10, mito 3                        | 0 | 0 | 231  | 4  |        |          |          | no  |                              | Apoplastic     | 0.71 |
| Vna5.423 | hypothetical protein FOXB_15602 [Fusarium oxysporum Fo5176]                               | 47.58 | 3E-142 | yes | yes | extr 12, golg 5, plas 4, E.R. 4                 | 0 | 0 | 543  | 3  |        |          |          | no  |                              | Non-apoplastic | 0.72 |
| Vna5.435 | hypothetical protein BN1708_001900 [Verticillium longisporum]                             | 85.81 | 3E-140 | yes | yes | mito 11, extr 10, cyto 4                        | 0 | 0 | 303  | 2  |        |          |          | no  |                              | Non-apoplastic | 0.92 |
| Vna5.474 | nuclease S1 VDBG_02003 [Verticillium alfalfae VaMs.102]                                   | 99.34 | 0      | yes | yes | extr 12, cyto 6.5, mito 5, cyto_nucl 4          | 0 | 0 | 302  | 4  |        |          |          | no  |                              | Non-apoplastic | 0.8  |
| Vna5.475 | hypothetical protein BN1708_015026 [Verticillium longisporum]                             | 65.45 | 6E-97  | yes | yes | extr 27                                         | 0 | 0 | 574  | 9  |        |          |          | no  |                              | Apoplastic     | 0.82 |
| Vna5.479 | hypothetical protein BN1708_015022 [Verticillium longisporum]                             | 98.11 | 7E-28  | yes | yes | extr 19, mito 3, plas 3                         | 1 | 0 | 53   | 2  |        |          |          | no  |                              | Apoplastic     | 0.76 |
| Vna5.480 | glucan 1,3-beta-glucosidase VDBG_02008 [Verticillium alfalfae VaMs.102]                   | 98.03 | 0      | yes | yes | extr 14, cyto 9, pero 2, E.R. 2                 | 0 | 0 | 305  | 6  |        |          |          | no  |                              | Non-apoplastic | 0.79 |
| Vna5.481 | candidapepsin-1 VDBG_02009 [Verticillium alfalfae VaMs.102]                               | 98.73 | 0      | yes | yes | extr 27                                         | 0 | 1 | 473  | 6  |        |          |          | no  | Mitochondria (0.969   47-81) | Apoplastic     | 0.63 |
| Vna5.513 | hypothetical protein BN1723_004509 [Verticillium longisporum]                             | 97    | 6E-47  | yes | yes | extr 24, mito 2                                 | 0 | 0 | 443  | 3  |        |          |          | no  |                              | Apoplastic     | 0.56 |
| Vna5.585 | hypothetical protein BN1708_002270 [Verticillium longisporum]                             | 93.69 | 4E-143 | yes | yes | extr 27                                         | 0 | 0 | 251  | 3  |        |          |          | no  |                              | Apoplastic     | 0.69 |
| Vna5.588 | hypothetical protein BN1708_002272 [Verticillium longisporum]                             | 43.14 | 3E-16  | yes | yes | extr 26                                         | 0 | 0 | 208  | 8  |        |          |          | no  |                              | Apoplastic     | 0.92 |
| Vna5.618 | hypothetical protein BN1708_014737 [Verticillium longisporum]                             | 91.19 | 0      | yes | yes | extr 14, mito 11.5, cyto_mito 6.5               | 0 | 0 | 711  | 0  |        |          |          | no  |                              | Non-apoplastic | 0.6  |
| Vna5.619 | hypothetical protein BN1723_006072, partial [Verticillium longisporum]                    | 91.05 | 4E-115 | yes | yes | extr 25                                         | 0 | 0 | 281  | 2  |        |          |          | no  |                              | Apoplastic     | 0.81 |
| Vna5.632 | hypothetical protein BN1708_014725 [Verticillium longisporum]                             | 98.29 | 0      | yes | yes | mito 10, cyto 9, extr 6                         | 0 | 0 | 620  | 4  |        |          |          | no  | Chloroplast (0.981   21-56)  | Non-apoplastic | 0.91 |
| Vna5.637 | hypothetical protein BN1723_006052 [Verticillium longisporum]                             | 83.52 | 0      | yes | yes | extr 21, pero 2, cyto_mito 1.833, mito 1.5      | 0 | 0 | 620  | 4  |        |          |          | no  |                              | Apoplastic     | 0.7  |
| Vna5.640 | conserved hypothetical protein VDBG_02176 [Verticillium alfalfae VaMs.102]                | 96.21 | 0      | yes | yes | extr 25                                         | 1 | 0 | 871  | 41 |        |          |          | no  |                              | Apoplastic     | 0.59 |
| Vna5.641 | conserved hypothetical protein VDBG_02177 [Verticillium alfalfae VaMs.102]                | 98.98 | 0      | yes | yes | extr 16, plas 8, cyto 1, E.R. 1, vacu 1         | 1 | 1 | 978  | 2  | 1.96   | 1.00E-09 | 3.88E-08 | no  |                              | Non-apoplastic | 0.81 |
| Vna5.643 | beta-Ig-H3/fasciclin VDBG_02179 [Verticillium alfalfae VaMs.102]                          | 98.69 | 0      | yes | yes | extr 22, mito 3                                 | 1 | 1 | 381  | 0  |        |          |          | no  |                              | Apoplastic     | 0.55 |
| Vna5.646 | hypothetical protein BN1708_009587 [Verticillium longisporum]                             | 64.56 | 0      | yes | yes | extr 22, mito 2, golg 2                         | 1 | 1 | 595  | 7  |        |          |          | no  |                              | Non-apoplastic | 0.57 |
| Vna5.662 | hypothetical protein VDBG_02201 [Verticillium alfalfae VaMs.102]                          | 100   | 1E-51  | yes | yes | extr 16, plas 4, vacu 4, E.R. 2                 | 0 | 0 | 90   | 4  |        |          |          | no  |                              | Apoplastic     | 0.62 |
| Vna5.663 | cerevisin [Verticillium dahliae VdLs.17] EGY21146                                         | 93.92 | 0      | yes | yes | extr 20, golg 3, E.R. 2                         | 0 | 0 | 526  | 6  |        |          |          | no  |                              | Non-apoplastic | 0.61 |
| Vna5.667 | hypothetical protein BN1723_006810 [Verticillium longisporum]                             | 95.32 | 0      | yes | yes | extr 24, mito 2                                 | 0 | 0 | 541  | 9  |        |          |          | no  |                              | Non-apoplastic | 0.53 |
| Vna5.682 | ser/Thr protein phosphatase family VDBG_02221 [Verticillium alfalfae VaMs.102]            | 99.18 | 0      | yes | yes | extr 17, mito 4, nucl 1, cyto 1, plas 1, cyto_n | 0 | 0 | 610  | 5  |        |          |          | no  |                              | Non-apoplastic | 0.82 |
| Vna5.694 | hypothetical protein BN1708_011604 [Verticillium longisporum]                             | 54.88 | 1E-17  | yes | yes | extr 27                                         | 0 | 0 | 81   | 6  |        |          |          | no  |                              | Apoplastic     | 0.87 |
| Vna5.698 | pectate lyase Pel-34K VDBG_02238 [Verticillium alfalfae VaMs.102]                         | 95.24 | 0      | yes | yes | extr 18, cyto 8                                 | 0 | 0 | 336  | 2  | -2.78  | 1.29E-10 | 5.82E-09 | no  |                              | Non-apoplastic | 0.52 |
| Vna5.711 | hypothetical protein BN1708_003481 [Verticillium longisporum]                             | 94.9  | 0      | yes | yes | extr 25                                         | 0 | 0 | 412  | 3  |        |          |          | no  |                              | Apoplastic     | 0.73 |
| Vna5.718 | conserved hypothetical protein VDBG_02261 [Verticillium alfalfae VaMs.102]                | 98.46 | 0      | yes | yes | extr 21, cyto 4                                 | 0 | 0 | 260  | 8  |        |          |          | no  |                              | Non-apoplastic | 0.52 |
| Vna5.719 | hypothetical protein BN1708_003474, partial [Verticillium longisporum]                    | 97.63 | 4E-120 | yes | yes | extr 21, E.R. 2, golg 2                         | 0 | 0 | 287  | 4  | -12.27 | 1.28E-14 | 8.90E-13 | no  |                              | Apoplastic     | 0.63 |
| Vna5.720 | hypothetical protein BN1708_003473 [Verticillium longisporum]                             | 75.99 | 1E-134 | yes | yes | mito 16, cyto 3.5, cyto_nucl 3, pero 3, extr 2  | 0 | 0 | 397  | 1  |        |          |          | no  |                              | Non-apoplastic | 0.97 |
| Vna5.721 | conserved hypothetical protein VDBG_02264 [Verticillium alfalfae VaMs.102]                | 100   | 3E-107 | yes | yes | extr 20, E.R. 3, mito 2                         | 0 | 0 | 155  | 4  |        |          |          | yes |                              | Non-apoplastic | 0.54 |
| Vna5.730 | hypothetical protein BN1708_003466 [Verticillium longisporum]                             | 98.96 | 0      | yes | yes | extr 15, mito 3, plas 3, cyto 2, pero 2, mito r | 0 | 1 | 1117 | 23 |        |          |          | no  |                              | Non-apoplastic | 1    |
| Vna5.731 | hypothetical protein BN1723_011768, partial [Verticillium longisporum]                    | 68.97 | 0      | yes | yes | extr 26                                         | 0 | 0 | 589  | 12 |        |          |          | no  |                              | Non-apoplastic | 0.54 |
| Vna5.732 | hypothetical protein BN1723_011767, partial [Verticillium longisporum]                    | 91.37 | 0      | yes | yes | extr 24, cyto 1, plas 1, E.R. 1                 | 0 | 0 | 556  | 14 |        |          |          | no  |                              | Non-apoplastic | 0.76 |
| Vna5.737 | predicted protein VDBG_02281 [Verticillium alfalfae VaMs.102]                             | 99.43 | 4E-126 | yes | yes | extr 24, mito 2                                 | 0 | 0 | 176  | 6  |        |          |          | no  |                              | Apoplastic     | 0.58 |
| Vna5.756 | conserved hypothetical protein VDBG_02301 [Verticillium alfalfae VaMs.102]                | 98.6  | 2E-153 | yes | yes | extr 27                                         | 0 | 0 | 214  | 4  |        |          |          | no  |                              | Apoplastic     | 0.82 |
| Vna5.771 | extracellular cell wall glucanase CrfI VDBG_02319 [Verticillium alfalfae VaMs.102]        | 99.44 | 0      | yes | yes | extr 22, mito 3                                 | 1 | 1 | 534  | 2  |        |          |          | no  |                              | Non-apoplastic | 0.74 |
| Vna5.772 | predicted protein VDBG_02320 [Verticillium alfalfae VaMs.102]                             | 87.61 | 9E-170 | yes | yes | mito 8, extr 8, golg 3, plas 2, cyto_nucl 2, va | 0 | 0 | 323  | 18 |        |          |          | no  |                              | Non-apoplastic | 0.89 |
| Vna5.782 | hypothetical protein BN1708_001614 [Verticillium longisporum]                             | 90.14 | 0      | yes | yes | extr 22, E.R. 3                                 | 0 | 0 | 527  | 4  |        |          |          | no  |                              | Non-apoplastic | 0.63 |
| Vna5.785 | hypothetical protein BN1708_009519 [Verticillium longisporum]                             | 65.24 | 4E-63  | yes | yes | extr 18, cyto 5, mito 3, cyto_pero 3            | 0 | 0 | 239  | 8  |        |          |          | no  |                              | Apoplastic     | 0.81 |
| Vna5.791 | glucan 1,3-beta-glucosidase [Verticillium dahliae VdLs.17] EGY21290                       | 99.33 | 0      | yes | yes | extr 23, cyto 2.5, cyto_nucl 2                  | 0 | 0 | 796  | 13 |        |          |          | no  |                              | Apoplastic     | 0.65 |
| Vna5.793 | hypothetical protein VDAG_02816 [Verticillium dahliae VdLs.17]                            | -     | -      | yes | yes | extr 17, cyto 7, cyto_nucl 5                    | 0 | 0 | 116  | 0  |        |          |          | no  |                              | Apoplastic     | 0.79 |
| Vna5.794 | hypothetical protein BN1708_001595, partial [Verticillium longisporum]                    | 63.34 | 2E-169 | yes | yes | extr 25                                         | 0 | 0 | 376  | 3  |        |          |          | no  |                              | Non-apoplastic | 0.53 |
| Vna5.797 | initiation-specific alpha-1,6-mannosyltransferase [Verticillium dahliae VdLs.17] EGY21296 | 75.14 | 0      | no  | yes | extr 13, E.R. 4, mito 3, plas 3, golg 3         | 1 | 0 | 368  | 1  |        |          |          | no  |                              | Non-apoplastic | 0.86 |
| Vna5.801 | conserved hypothetical protein VDBG_02354 [Verticillium alfalfae VaMs.102]                | 100   | 2E-77  | yes | yes | extr 18, E.R. 3, golg 3, vacu 2                 | 0 | 0 | 168  | 4  |        |          |          | no  |                              | Non-apoplastic | 0.65 |
| Vna5.806 | hypothetical protein BN1723_011054, partial [Verticillium longisporum]                    | 64.29 | 0      | yes | yes | extr 26                                         | 0 | 0 | 504  | 3  |        |          |          | no  |                              | Apoplastic     | 0.66 |
| Vna5.807 | YkgB VDBG_02359 [Verticillium alfalfae VaMs.102]                                          | 99    | 0      | yes | yes | extr 24, cyto 2                                 | 0 | 0 | 399  | 3  |        |          |          | no  |                              | Apoplastic     | 0.72 |
| Vna5.811 | hypothetical protein BN1723_010987 [Verticillium longisporum]                             | 93.13 | 0      | yes | yes | extr 17, mito 6, pero 2, cyto 1.5, cyto_nucl 1  | 0 | 0 | 568  | 9  |        |          |          | no  |                              | Non-apoplastic | 0.52 |
| Vna5.820 | hypothetical protein BN1723_001457 [Verticillium longisporum]                             | 71.29 | 0      | yes | yes | extr 26                                         | 0 | 0 | 423  | 3  |        |          |          | no  |                              | Apoplastic     | 0.82 |
| Vna5.849 | hypothetical protein BN1723_001487 [Verticillium longisporum]                             | 80.33 | 0      | yes | yes | extr 25                                         | 0 | 0 | 485  | 12 |        |          |          | no  |                              | Non-apoplastic | 0.5  |
| Vna5.854 | pectate lyase VDBG_02413 [Verticillium alfalfae VaMs.102]                                 | 100   | 0      | yes | yes | extr 27                                         | 0 | 0 | 337  | 3  |        |          |          | no  |                              | Apoplastic     | 0.74 |
| Vna5.855 | hypothetical protein BN1708_007929, partial [Verticillium longisporum]                    | 65.28 | 2E-164 | yes | yes | extr 13, plas 5, E.R. 5, mito 1, cyto 1, golg 1 | 0 | 0 | 348  | 3  |        |          |          | no  |                              | Non-apoplastic | 0.7  |
| Vna5.857 | conserved hypothetical protein VDBG_02415 [Verticillium alfalfae VaMs.102]                | 100   | 3E-107 | yes | yes | extr 25                                         | 0 | 0 | 169  | 0  |        |          |          | no  |                              | Apoplastic     | 0.69 |
| Vna5.866 | exoglucanase VDBG_02425 [Verticillium alfalfae VaMs.102]                                  | 100   | 0      | yes | yes | extr 26                                         | 0 | 0 | 451  | 18 |        |          |          | no  |                              | Apoplastic     | 0.78 |
| Vna5.869 | hypothetical protein BN1708_007914, partial [Verticillium longisporum]                    | 98.06 | 4E-105 | yes | yes | extr 27                                         | 0 | 0 | 155  | 4  |        |          |          | no  |                              | Apoplastic     | 0.89 |
| Vna5.871 | hypothetical protein BN1723_001509 [Verticillium longisporum]                             | 85.9  | 0      | yes | yes | extr 25                                         | 0 | 0 | 390  | 11 |        |          |          | no  |                              | Apoplastic     | 0.71 |
| Vna5.873 | hypothetical protein BN1708_011349, partial [Verticillium longisporum]                    | 86.67 | 3E-134 | yes | yes | extr 24, vacu 2                                 | 0 | 0 | 285  | 9  |        |          |          | no  |                              | Apoplastic     | 0.85 |
| Vna5.874 | alpha-galactosidase [Verticillium dahliae VdLs.17] EGY21383                               | 71.09 | 0      | yes | yes | extr 20, cyto 3.5, cyto_nucl 2.5, pero 2        | 0 | 0 | 549  | 7  | -2.38  | 1.00E-15 | 7.75E-14 | no  |                              | Non-apoplastic | 0.62 |



|          |                                                                                               |       |        |     |     |                                                 |   |     |      |     |       |           |           |    |     |                              |                |      |
|----------|-----------------------------------------------------------------------------------------------|-------|--------|-----|-----|-------------------------------------------------|---|-----|------|-----|-------|-----------|-----------|----|-----|------------------------------|----------------|------|
| Vna7.137 | predicted protein VDBG_01351 [Verticillium alfalfae VaMs.102]                                 | 94.46 | 0      | yes | yes | extr 20, plas 3, golg 2                         | 0 | 0   | 271  | 8   |       |           |           |    | no  |                              | Non-apoplastic | 0.52 |
| Vna7.140 | MAS1 protein [Verticillium dahliae VdLs.17] EGY16740                                          | 70.07 | 3E-137 | yes | yes | extr 22, mito 2.5, cyto_mito 2.5                | 0 | 0   | 301  | 4   |       |           |           |    | no  |                              | Apoplastic     | 0.74 |
| Vna7.166 | hypothetical protein VDAG_07937 [Verticillium dahliae VdLs.17]                                | 97.39 | 0      | yes | yes | extr 25                                         | 0 | 0   | 307  | 1   |       |           |           |    | no  |                              | Non-apoplastic | 0.51 |
| Vna7.176 | hypothetical protein BNI708_010542 [Verticillium longisporum]                                 | 98.46 | 0      | yes | yes | extr 23, cyto 2.5, cyto_nucl 2                  | 0 | 0   | 626  | 9   |       |           |           |    | no  |                              | Non-apoplastic | 0.53 |
| Vna7.182 | alpha-L-rhamnosidase [Verticillium dahliae VdLs.17] EGY16791                                  | 93.25 | 0      | yes | yes | extr 25                                         | 0 | 0   | 685  | 4   |       |           |           |    | no  | Chloroplast (0.931   24-60)  | Apoplastic     | 0.78 |
| Vna7.184 | hypothetical protein BNI723_002304 [Verticillium longisporum]                                 | 91.12 | 2E-82  | yes | yes | extr 22, mito 2, cyto 2, cyto_mito 2            | 0 | 0   | 291  | 18  |       |           |           |    | no  |                              | Apoplastic     | 0.91 |
| Vna7.194 | hypothetical protein BNI708_010569, partial [Verticillium longisporum]                        | 98.22 | 0      | yes | 1   | extr 27                                         | 0 | 0   | 337  | 5   |       |           |           |    | no  |                              | Apoplastic     | 0.74 |
| Vna7.198 | hypothetical protein VDAG_07972 [Verticillium dahliae VdLs.17]                                | 96.55 | 4E-121 | yes | yes | extr 25                                         | 0 | 0   | 264  | 6   |       |           |           |    | no  |                              | Apoplastic     | 0.68 |
| Vna7.204 | aminopeptidase Y [Verticillium dahliae VdLs.17] EGY16816                                      | 96.44 | 0      | yes | yes | extr 20, cyto 4.5, cyto_nucl 3                  | 0 | 0   | 491  | 5   |       |           |           |    | no  |                              | Non-apoplastic | 0.6  |
| Vna7.207 | mixed-linked glucanase [Verticillium dahliae VdLs.17] EGY16819                                | 95.6  | 0      | yes | yes | extr 13, mito 4, cyto 4, E.R. 4, cyto_mito 4    | 0 | 1   | 1025 | 18  |       |           |           |    | no  |                              | Non-apoplastic | 0.53 |
| Vna7.214 | hypothetical protein BNI708_011511 [Verticillium longisporum]                                 | 97.06 | 4E-82  | yes | yes | extr 27                                         | 0 | 0   | 170  | 12  |       |           |           |    | no  |                              | Apoplastic     | 0.83 |
| Vna7.239 | hypothetical protein BNI708_011259 [Verticillium longisporum]                                 | 99.32 | 0      | yes | yes | extr 16, mito 4, cyto 3, plas 2, mito_nucl 2, c | 0 | 0   | 308  | 6   |       |           |           |    | no  |                              | Non-apoplastic | 0.85 |
| Vna7.246 | metalloproteinase VDBG_01232 [Verticillium alfalfae VaMs.102]                                 | 99.72 | 0      | yes | yes | extr 16, cyto_mito 6, mito 5.5, cyto 5.5        | 0 | 0   | 351  | 10  |       |           |           |    | yes |                              | Non-apoplastic | 0.66 |
| Vna7.252 | conserved hypothetical protein VDBG_01225 [Verticillium alfalfae VaMs.102]                    | 97.2  | 0      | yes | yes | extr 26                                         | 0 | 0   | 751  | 9   |       |           |           |    | yes |                              | Apoplastic     | 0.79 |
| Vna7.267 | hypothetical protein BNI708_010228 [Verticillium longisporum]                                 | 88.42 | 0      | yes | yes | extr 23, mito 2                                 | 0 | 0   | 566  | 0   | 4.49  | 4.44E-16  | 3.49E-14  |    | no  |                              | Apoplastic     | 0.69 |
| Vna7.268 | hypothetical protein BNI708_010229 [Verticillium longisporum]                                 | 82.94 | 5E-172 | yes | yes | extr 26                                         | 0 | 0   | 383  | 10  |       |           |           |    | yes |                              | Apoplastic     | 0.81 |
| Vna7.276 | hypothetical protein BNI708_010235 [Verticillium longisporum]                                 | 64.76 | 0      | yes | yes | extr 26                                         | 0 | 0   | 465  | 10  |       |           |           |    | no  |                              | Apoplastic     | 0.78 |
| Vna7.279 | hypothetical protein BNI708_010247 [Verticillium longisporum]                                 | 96.65 | 0      | yes | yes | extr 25                                         | 0 | 0   | 3526 | 350 |       |           |           |    | no  |                              | Apoplastic     | 0.88 |
| Vna7.282 | hypothetical protein BNI723_016505, partial [Verticillium longisporum]                        | 97.81 | 0      | yes | yes | extr 25                                         | 0 | 0   | 422  | 5   |       |           |           |    | no  |                              | Non-apoplastic | 0.6  |
| Vna7.287 | hypothetical protein BNI708_010425 [Verticillium longisporum]                                 | 53.99 | 5E-133 | yes | yes | extr 16, cyto 9                                 | 0 | 0   | 494  | 14  |       |           |           |    | no  |                              | Non-apoplastic | 0.63 |
| Vna7.292 | hypothetical protein BNI708_010255, partial [Verticillium longisporum]                        | 79.5  | 0      | yes | yes | extr 23, cyto 1.5, cyto_nucl 1.5                | 0 | 0   | 560  | 9   |       |           |           |    | no  |                              | Apoplastic     | 0.81 |
| Vna7.293 | peroxidase manganese-dependent 1 VDBG_01180 [Verticillium alfalfae VaMs.102]                  | 99.5  | 0      | yes | yes | extr 26                                         | 0 | 0   | 399  | 8   |       |           |           |    | no  | Mitochondria (0.941   54-95) | Non-apoplastic | 0.66 |
| Vna7.304 | polygalacturonase VDBG_01164 [Verticillium alfalfae VaMs.102]                                 | 99.57 | 0      | yes | yes | extr 22, E.R. 2, vacu 2                         | 0 | 0   | 464  | 11  |       |           |           |    | no  |                              | Non-apoplastic | 0.77 |
| Vna7.315 | hypothetical protein BNI708_002672 [Verticillium longisporum]                                 | 85.53 | 2E-37  | yes | yes | extr 21, E.R. 3, golg 2                         | 0 | 0   | 85   | 6   |       |           |           |    | no  |                              | Non-apoplastic | 0.6  |
| Vna7.321 | exoglucanase [Verticillium dahliae VdLs.17] EGY14070                                          | 66.74 | 0      | yes | yes | extr 26                                         | 0 | 0   | 533  | 22  |       |           |           |    | yes |                              | Apoplastic     | 0.94 |
| Vna7.322 | metalloprotease VDBG_01143 [Verticillium alfalfae VaMs.102]                                   | 99.3  | 0      | yes | yes | extr 24, mito 2                                 | 0 | 0   | 284  | 5   |       |           |           |    | no  |                              | Apoplastic     | 0.76 |
| Vna7.324 | predicted protein VDBG_01141 [Verticillium alfalfae VaMs.102]                                 | 97.07 | 1E-175 | yes | yes | extr 26                                         | 0 | 1   | 273  | 1   |       |           |           |    | no  |                              | Apoplastic     | 0.7  |
| Vna7.332 | hypothetical protein BNI723_003599 [Verticillium longisporum]                                 | 89.96 | 0      | yes | yes | extr 23, plas 2                                 | 0 | 0   | 837  | 5   |       |           |           |    | no  | Mitochondria (0.784   32-94) | Non-apoplastic | 0.56 |
| Vna7.341 | peroxisomal (S)-2-hydroxy-acid oxidase [Verticillium dahliae VdLs.17] EGY14048                | 92.95 | 0      | yes | yes | extr 19, cyto 4, mito 2                         | 0 | 0   | 397  | 0   |       |           |           |    | no  |                              | Non-apoplastic | 0.58 |
| Vna7.344 | C-type cyclin [Verticillium dahliae VdLs.17] EGY14045                                         | 93.45 | 0      | yes | yes | extr 13, E.R. 5, cyto 2, pero 2, golg 2, cyto_p | 0 | 0   | 523  | 8   |       |           |           |    | no  |                              | Non-apoplastic | 0.95 |
| Vna7.352 | beta-galactosidase VDBG_01107 [Verticillium alfalfae VaMs.102]                                | 98.68 | 0      | yes | yes | extr 23, mito 2, vacu 2                         | 0 | 0   | 992  | 4   |       |           |           |    | no  |                              | Non-apoplastic | 0.56 |
| Vna7.353 | hypothetical protein BNI708_007982 [Verticillium longisporum]                                 | 92.14 | 0      | yes | yes | extr 16, mito 3, golg 3, E.R. 2, cyto_mito 2    | 0 | 0   | 561  | 4   |       |           |           |    | no  |                              | Non-apoplastic | 0.55 |
| Vna7.364 | hypothetical protein BNI708_007954 [Verticillium longisporum]                                 | 99.62 | 0      | yes | 1   | extr 25                                         | 1 | 826 | 5    |     |       |           |           | no |     | Non-apoplastic               | 0.76           |      |
| Vna7.365 | hypothetical protein BNI708_007955 [Verticillium longisporum]                                 | 49.56 | 1E-114 | yes | yes | extr 23, mito 2, golg 2                         | 0 | 0   | 853  | 20  |       |           |           |    | no  |                              | Non-apoplastic | 0.54 |
| Vna7.429 | hypothetical protein VDAG_00636 [Verticillium dahliae VdLs.17]                                | 97.52 | 3E-121 | yes | yes | extr 25                                         | 0 | 0   | 303  | 6   |       |           |           |    | no  | Chloroplast (0.973   27-52)  | Non-apoplastic | 0.53 |
| Vna7.437 | neuroigin-4 [Verticillium dahliae VdLs.17] EGY13945                                           | 94.82 | 0      | yes | yes | extr 19, mito 3, pero 2, cyto 1.5, cyto_nucl 1  | 0 | 0   | 598  | 6   |       |           |           |    | no  |                              | Non-apoplastic | 0.53 |
| Vna7.443 | hypothetical protein BNI708_009057, partial [Verticillium longisporum]                        | 98.06 | 2E-95  | yes | yes | extr 17, mito 3, golg 3, vacu 2, cyto_mito 2    | 0 | 0   | 276  | 0   |       |           |           |    | no  |                              | Non-apoplastic | 0.55 |
| Vna7.448 | hypothetical protein BNI708_009050 [Verticillium longisporum]                                 | 50.27 | 1E-91  | yes | yes | extr 14, plas 5, mito 4, nucl 2, pero 2, cyto_n | 1 | 1   | 374  | 8   | -1.77 | 2.04E-11  | 9.95E-10  |    | no  |                              | Non-apoplastic | 0.59 |
| Vna7.458 | hypothetical protein BNI708_006034 [Verticillium longisporum]                                 | 43.83 | 0      | yes | yes | extr 12, plas 5, cyto 4.5, cyto_nucl 3, mito 2  | 0 | 0   | 1120 | 17  |       |           |           |    | no  |                              | Non-apoplastic | 0.93 |
| Vna7.463 | acetyl esterase VDBG_00988 [Verticillium alfalfae VaMs.102]                                   | 99.15 | 0      | yes | yes | extr 24, mito 2                                 | 0 | 0   | 351  | 4   |       |           |           |    | no  |                              | Apoplastic     | 0.68 |
| Vna7.466 | hypothetical protein BNI708_009371 [Verticillium longisporum]                                 | 100   | 8E-145 | yes | yes | extr 23, mito 2                                 | 0 | 0   | 223  | 5   |       |           |           |    | no  |                              | Apoplastic     | 0.8  |
| Vna7.467 | hypothetical protein VDAG_00596 [Verticillium dahliae VdLs.17]                                | 97.8  | 8E-54  | yes | yes | extr 10, plas 7, E.R. 3, vacu 3, mito 2         | 0 | 0   | 236  | 4   |       |           |           |    | no  |                              | Apoplastic     | 0.6  |
| Vna7.484 | conserved hypothetical protein VDBG_00965 [Verticillium alfalfae VaMs.102]                    | 99.57 | 7E-163 | yes | yes | extr 26                                         | 0 | 1   | 261  | 12  | 1.78  | 2.35E-07  | 6.19E-06  |    | no  |                              | Apoplastic     | 0.8  |
| Vna7.501 | phosphatidylglycerol/phosphatidylinositol transfer protein [Verticillium dahliae VdLs.17] EGY | 99.44 | 6E-123 | yes | yes | extr 16, E.R. 4, nucl 2, golg 2, vacu 2         | 0 | 0   | 179  | 4   |       |           |           |    | no  |                              | Non-apoplastic | 0.84 |
| Vna7.531 | hypothetical protein BNI723_003342 [Verticillium longisporum]                                 | 57.85 | 2E-142 | yes | yes | extr 25                                         | 0 | 0   | 417  | 15  |       |           |           |    | no  |                              | Apoplastic     | 0.57 |
| Vna7.544 | glucan 1,3-beta-glucosidase VDBG_00902 [Verticillium alfalfae VaMs.102]                       | 99.38 | 0      | yes | yes | extr 26                                         | 0 | 0   | 484  | 2   |       |           |           |    | no  |                              | Apoplastic     | 0.6  |
| Vna7.552 | hypothetical protein BNI708_003028 [Verticillium longisporum]                                 | 94.99 | 0      | yes | yes | cyto 7, extr 7, E.R. 5, mito 4, cyto_nucl 4     | 1 | 1   | 718  | 8   |       |           |           |    | no  |                              | Non-apoplastic | 0.93 |
| Vna7.554 | carboxypeptidase S1 VDBG_00889 [Verticillium alfalfae VaMs.102]                               | 99.37 | 0      | yes | yes | extr 25                                         | 0 | 0   | 473  | 9   |       |           |           |    | no  | Chloroplast (0.875   52-111) | Apoplastic     | 0.78 |
| Vna7.555 | hypothetical protein BNI708_003059 [Verticillium longisporum]                                 | 99.27 | 0      | yes | yes | extr 27                                         | 0 | 0   | 409  | 2   |       |           |           |    | no  |                              | Apoplastic     | 0.81 |
| Vna7.561 | hypothetical protein BNI723_000927 [Verticillium longisporum]                                 | 76.96 | 0      | yes | yes | cyto_mito 7.333, cyto 7, mito 6.5, extr 6, cyt  | 0 | 0   | 404  | 4   |       |           |           |    | no  |                              | Non-apoplastic | 0.95 |
| Vna7.562 | phosphorylcholine phosphatase VDBG_00881 [Verticillium alfalfae VaMs.102]                     | 97.96 | 0      | yes | yes | extr 20, mito 4, pero 2                         | 0 | 0   | 388  | 2   |       |           |           |    | yes |                              | Non-apoplastic | 0.51 |
| Vna7.563 | hypothetical protein BNI723_000930 [Verticillium longisporum]                                 | 62.37 | 4E-119 | yes | yes | extr 17, mito 8                                 | 0 | 0   | 290  | 5   |       |           |           |    | no  |                              | Apoplastic     | 0.57 |
| Vna7.566 | hypothetical protein VDAG_00487 [Verticillium dahliae VdLs.17]                                | 90.1  | 2E-48  | yes | yes | extr 24, mito 1, E.R. 1, vacu 1                 | 0 | 0   | 202  | 4   |       |           |           |    | no  |                              | Apoplastic     | 0.6  |
| Vna7.568 | conserved hypothetical protein VDBG_00872 [Verticillium alfalfae VaMs.102]                    | 98.36 | 1E-81  | yes | yes | extr 13, mito 5, plas 4, E.R. 2, cyto 1, pero 1 | 1 | 0   | 122  | 3   |       |           |           |    | no  |                              | Non-apoplastic | 0.78 |
| Vna7.569 | hypothetical protein BNI723_000941 [Verticillium longisporum]                                 | 94.57 | 4E-56  | yes | yes | extr 20, cyto 3, pero 2                         | 0 | 0   | 282  | 0   |       |           |           |    | no  |                              | Non-apoplastic | 0.56 |
| Vna7.570 | predicted protein VDBG_00870 [Verticillium alfalfae VaMs.102]                                 | 99.42 | 3E-110 | yes | yes | extr 27                                         | 0 | 0   | 171  | 0   |       |           |           |    | no  |                              | Apoplastic     | 0.57 |
| Vna7.601 | conserved hypothetical protein VDBG_00832 [Verticillium alfalfae VaMs.102]                    | 92.6  | 0      | yes | yes | extr 22, E.R. 3                                 | 0 | 0   | 309  | 4   | -7.75 | 3.94E-168 | 4.94E-166 |    | no  |                              | Apoplastic     | 0.57 |
| Vna7.614 | hypothetical protein BNI708_007072 [Verticillium longisporum]                                 | 88.66 | 3E-115 | yes | yes | extr 17, mito 3, cyto 2, E.R. 2, plas 1, cyto_n | 0 | 0   | 179  | 1   |       |           |           |    | no  |                              | Non-apoplastic | 0.67 |
| Vna7.617 | conserved hypothetical protein VDBG_00813 [Verticillium alfalfae VaMs.102]                    | 95.62 | 0      | yes | yes | extr 24, cyto 2                                 | 1 | 1   | 861  | 0   |       |           |           |    | no  |                              | Apoplastic     | 0.63 |
| Vna7.632 | glucoamylase P VDBG_00799 [Verticillium alfalfae VaMs.102]                                    | 99.36 | 0      | yes | yes | extr 27                                         | 0 | 0   | 622  | 11  |       |           |           |    | no  |                              | Apoplastic     | 0.57 |
| Vna7.695 | hypothetical protein BNI723_011901 [Verticillium longisporum]                                 | 52.1  | 0      | yes | yes | extr 23, plas 2                                 | 1 | 1   | 843  | 11  |       |           |           |    | no  |                              | Non-apoplastic | 0.53 |
| Vna7.709 | hypothetical protein BNI708_005235 [Verticillium longisporum]                                 | 98.78 | 0      | yes | yes | extr 24, cyto 3                                 | 1 | 0   | 583  | 16  |       |           |           |    | no  |                              | Apoplastic     | 0.66 |



|                 |                                                                                                    |       |        |     |     |                                                    |   |   |     |    |       |          |          |     |                             |               |      |
|-----------------|----------------------------------------------------------------------------------------------------|-------|--------|-----|-----|----------------------------------------------------|---|---|-----|----|-------|----------|----------|-----|-----------------------------|---------------|------|
| <i>Vna8.446</i> | cutinase [Verticillium dahliae VdLs.17] EGY21677                                                   | 81.78 | 9E-134 | yes | yes | extr 18, mito 7                                    | 0 | 0 | 247 | 4  |       |          | no       |     | Apoplatic                   | 0.64          |      |
| <i>Vna8.447</i> | predicted protein VDBG_05958 [Verticillium alfalfae VaMs.102]                                      | 78.6  | 9E-117 | yes | yes | extr 22, plas 2, pero 2                            | 0 | 0 | 229 | 17 |       |          | no       |     | Apoplatic                   | 0.67          |      |
| <i>Vna8.455</i> | lipase [Verticillium dahliae VdLs.17] EGY21687                                                     | 65.96 | 0      | yes | yes | extr 22, E.R. 4                                    | 0 | 0 | 430 | 11 |       |          | no       |     | Non-apoplatic               | 0.86          |      |
| <i>Vna8.512</i> | predicted protein VDBG_06029 [Verticillium alfalfae VaMs.102]                                      | 96.15 | 0      | yes | yes | mito 10.5, cyto_mito 9, extr 8, cyto 6.5           | 0 | 0 | 260 | 5  |       |          | no       |     | Non-apoplatic               | 0.95          |      |
| <i>Vna8.524</i> | conserved hypothetical protein VDBG_06041 [Verticillium alfalfae VaMs.102]                         | 98.8  | 4E-109 | yes | yes | extr 24, mito 1, plas 1, vacu 1                    | 0 | 0 | 166 | 10 |       |          | no       |     | Apoplatic                   | 0.92          |      |
| <i>Vna8.540</i> | predicted protein VDBG_06061 [Verticillium alfalfae VaMs.102]                                      | 95.73 | 8E-113 | yes | yes | extr 27                                            | 1 | 0 | 164 | 10 |       |          | no       |     | Apoplatic                   | 0.61          |      |
| <i>Vna8.550</i> | triacylglycerol lipase FGL4 VDBG_06076 [Verticillium alfalfae VaMs.102]                            | 98.21 | 0      | yes | yes | extr 21, mito 3, pero 2                            | 0 | 0 | 559 | 7  |       |          | no       |     | Apoplatic                   | 0.6           |      |
| <i>Vna8.596</i> | 60S acidic ribosomal protein P2 VDBG_06125 [Verticillium alfalfae VaMs.102]                        | 99.09 | 4E-67  | yes | yes | extr 10, cyto 8.5, mito 6, cyto_nucl 5.5           | 0 | 0 | 110 | 0  |       |          | no       |     | Non-apoplatic               | 0.69          |      |
| <i>Vna8.599</i> | hypothetical protein BNI723_010278 [Verticillium longisporum]                                      | 100   | 1E-180 | yes | yes | mito 7.5, cyto_mito 7.5, cyto 6.5, nucl 4, extr 25 | 0 | 0 | 466 | 4  |       |          | no       |     | Non-apoplatic               | 0.92          |      |
| <i>Vna8.607</i> | aspartic protease VDBG_06140 [Verticillium alfalfae VaMs.102]                                      | 96.96 | 0      | yes | yes | extr 25                                            | 0 | 0 | 427 | 6  | 1.41  | 6.65E-10 | 2.70E-08 | no  |                             | Apoplatic     | 0.62 |
| <i>Vna8.621</i> | hypothetical protein BNI708_006704, partial [Verticillium longisporum]                             | -     | -      | yes | yes | extr 19, mito 2, plas 2, E.R. 2                    | 0 | 0 | 140 | 0  |       |          |          | no  |                             | Non-apoplatic | 0.77 |
| <i>Vna8.625</i> | hypothetical protein BNI708_006699 [Verticillium longisporum]                                      | 96.98 | 0      | yes | yes | mito 17.5, cyto_mito 12, cyto 5.5, extr 4          | 1 | 0 | 431 | 4  |       |          |          | no  |                             | Non-apoplatic | 0.99 |
| <i>Vna8.627</i> | conserved hypothetical protein VDBG_06163 [Verticillium alfalfae VaMs.102]                         | 99.04 | 4E-143 | yes | yes | extr 26                                            | 1 | 0 | 208 | 10 |       |          |          | no  |                             | Apoplatic     | 0.94 |
| <i>Vna8.637</i> | chitin deacetylase VDBG_06177 [Verticillium alfalfae VaMs.102]                                     | 98.59 | 0      | yes | yes | extr 17, nucl 3, cyto 3, cyto_nucl 3               | 0 | 0 | 425 | 4  | 1.35  | 5.97E-09 | 2.11E-07 | no  |                             | Non-apoplatic | 0.53 |
| <i>Vna8.658</i> | hypothetical protein VDAG_03349 [Verticillium dahliae VdLs.17]                                     | 95.02 | 0      | yes | yes | extr 21, cyto 4.5, cyto_nucl 3.5                   | 0 | 0 | 562 | 15 |       |          |          | no  |                             | Apoplatic     | 0.85 |
| <i>Vna8.663</i> | hypothetical protein BNI708_009937 [Verticillium longisporum]                                      | 95.86 | 0      | yes | yes | extr 27                                            | 0 | 0 | 338 | 18 |       |          |          | no  | Chloroplast (0.995   47-69) | Apoplatic     | 0.95 |
| <i>Vna8.678</i> | glycosyl hydrolase family 43 protein VDBG_06220 [Verticillium alfalfae VaMs.102]                   | 99.11 | 0      | yes | yes | extr 21, golg 3, mito 1, E.R. 1, vacu 1            | 0 | 0 | 448 | 4  |       |          |          | yes |                             | Non-apoplatic | 0.52 |
| <i>Vna8.679</i> | predicted protein VDBG_06221 [Verticillium alfalfae VaMs.102]                                      | 98.49 | 0      | yes | yes | extr 25                                            | 0 | 0 | 342 | 8  |       |          |          | no  |                             | Apoplatic     | 0.68 |
| <i>Vna8.681</i> | hypothetical protein BNI708_012437, partial [Verticillium longisporum]                             | 86.67 | 1E-10  | yes | yes | extr 12, cyto 6, mito 5, nucl 3, cyto_pero 3       | 0 | 0 | 220 | 12 |       |          |          | no  |                             | Non-apoplatic | 0.68 |
| <i>Vna8.686</i> | hypothetical protein VDAG_03382 [Verticillium dahliae VdLs.17]                                     | 96.91 | 3E-52  | yes | yes | extr 24, mito 3                                    | 0 | 0 | 347 | 2  |       |          |          | no  | Chloroplast (0.715   62-95) | Apoplatic     | 0.73 |
| <i>Vna8.688</i> | conserved hypothetical protein VDBG_06229 [Verticillium alfalfae VaMs.102]                         | 97.3  | 1E-87  | yes | yes | extr 23, plas 2                                    | 0 | 0 | 169 | 5  |       |          |          | no  | Chloroplast (0.988   48-68) | Apoplatic     | 0.59 |
| <i>Vna8.690</i> | endo-1,4-beta-xylanase Z VDBG_06231 [Verticillium alfalfae VaMs.102]                               | 99.76 | 0      | yes | yes | extr 23, cyto 2                                    | 0 | 0 | 420 | 8  |       |          |          | yes |                             | Apoplatic     | 0.81 |
| <i>Vna8.691</i> | hypothetical protein BNI708_009912, partial [Verticillium longisporum]                             | 98.67 | 1E-41  | yes | yes | extr 19, E.R. 4, mito 3                            | 1 | 0 | 95  | 0  |       |          |          | no  |                             | Non-apoplatic | 0.54 |
| <i>Vna8.701</i> | predicted protein VDBG_06242 [Verticillium alfalfae VaMs.102]                                      | 97.77 | 0      | yes | yes | extr 22, mito 2, plas 2                            | 1 | 1 | 356 | 6  | -3.34 | 3.87E-28 | 3.66E-26 | no  |                             | Apoplatic     | 0.64 |
| <i>Vna8.705</i> | predicted protein VDBG_06246 [Verticillium alfalfae VaMs.102]                                      | 97.01 | 2E-113 | yes | yes | extr 12, mito 7, nucl 4, cyto 4, cyto_nucl 4       | 0 | 0 | 170 | 10 |       |          |          | no  |                             | Non-apoplatic | 0.58 |
| <i>Vna8.710</i> | hypothetical protein VDAG_03405 [Verticillium dahliae VdLs.17]                                     | 88.31 | 0      | yes | yes | extr 21, mito 4                                    | 0 | 0 | 401 | 2  |       |          |          | no  |                             | Non-apoplatic | 0.53 |
| <i>Vna8.711</i> | hypothetical protein BNI723_013726 [Verticillium longisporum]                                      | 96.2  | 0      | yes | yes | extr 25                                            | 0 | 0 | 824 | 8  | 1.77  | 1.01E-08 | 3.43E-07 | no  |                             | Non-apoplatic | 0.52 |
| <i>Vna8.712</i> | hypothetical protein BNI708_010219, partial [Verticillium longisporum]                             | 59.61 | 3E-108 | yes | yes | extr 15, mito 9, cyto 3                            | 0 | 0 | 277 | 5  |       |          |          | no  |                             | Non-apoplatic | 0.55 |
| <i>Vna8.716</i> | hypothetical protein BNI708_002584 [Verticillium longisporum]                                      | 96.58 | 4E-94  | yes | yes | extr 15, E.R. 4, golg 3, cyto 2.5, cyto_nucl 2     | 0 | 0 | 234 | 10 |       |          |          | no  |                             | Non-apoplatic | 0.87 |
| <i>Vna8.724</i> | hypothetical protein BNI708_003221, partial [Verticillium longisporum]                             | 87    | 2E-42  | yes | yes | extr 20, mito 3, E.R. 2                            | 1 | 1 | 295 | 14 |       |          |          | no  |                             | Non-apoplatic | 0.57 |
| <i>Vna8.736</i> | predicted protein VDBG_06287 [Verticillium alfalfae VaMs.102]                                      | 97.22 | 7E-171 | yes | yes | cyto 17.5, cyto_nucl 9.5, extr 4, mito 3           | 0 | 0 | 252 | 2  |       |          |          | no  | Chloroplast (0.89   47-68)  | Non-apoplatic | 0.8  |
| <i>Vna8.757</i> | thioredoxin VDBG_06310 [Verticillium alfalfae VaMs.102]                                            | 98.77 | 4E-110 | yes | yes | extr 22, plas 2, E.R. 2                            | 1 | 0 | 162 | 2  |       |          |          | no  |                             | Non-apoplatic | 0.73 |
| <i>Vna8.766</i> | cutinase-2 VDBG_06321 [Verticillium alfalfae VaMs.102]                                             | 99.55 | 1E-160 | yes | yes | extr 17, mito 3, pero 3, nucl 2, cyto 2, cyto_p    | 0 | 0 | 227 | 5  |       |          |          | no  |                             | Apoplatic     | 0.66 |
| <i>Vna8.776</i> | exoglucanase [Verticillium dahliae VdLs.17] EGY22043                                               | 67.95 | 0      | yes | yes | extr 26                                            | 0 | 0 | 543 | 24 |       |          |          | no  |                             | Apoplatic     | 0.95 |
| <i>Vna8.780</i> | riboflavin aldehyde-forming enzyme VDBG_06337 [Verticillium alfalfae VaMs.102]                     | 97.92 | 0      | yes | yes | extr 26                                            | 0 | 0 | 288 | 6  |       |          |          | no  |                             | Non-apoplatic | 0.53 |
| <i>Vna8.781</i> | hypothetical protein BNI708_003153 [Verticillium longisporum]                                      | 61.69 | 4E-86  | yes | yes | extr 26                                            | 0 | 0 | 201 | 5  |       |          |          | no  |                             | Apoplatic     | 0.7  |
| <i>Vna8.786</i> | hypothetical protein BNI708_015308 [Verticillium longisporum]                                      | 98.33 | 0      | yes | yes | extr 23, mito 3                                    | 0 | 0 | 477 | 5  |       |          |          | no  |                             | Apoplatic     | 0.66 |
| <i>Vna8.788</i> | necrosis-and ethylene-inducing protein inducing factor VDBG_06347 [Verticillium alfalfae VaMs.102] | 99.65 | 0      | yes | yes | extr 25                                            | 1 | 0 | 283 | 7  | 2.44  | 0        | 0        | no  |                             | Non-apoplatic | 0.81 |
| <i>Vna8.791</i> | cellobiose dehydrogenase VDBG_06351 [Verticillium alfalfae VaMs.102]                               | 92.83 | 0      | yes | yes | extr 25                                            | 0 | 0 | 767 | 5  |       |          |          | no  |                             | Apoplatic     | 0.9  |
| <i>Vna8.805</i> | conserved hypothetical protein VDBG_06367 [Verticillium alfalfae VaMs.102]                         | 99.14 | 2E-163 | yes | yes | extr 23, mito 4                                    | 0 | 0 | 233 | 9  |       |          |          | no  |                             | Apoplatic     | 0.85 |
| <i>Vna8.814</i> | alpha-glucuronidase VDBG_06380 [Verticillium alfalfae VaMs.102]                                    | 99.41 | 0      | yes | yes | extr 23, vacu 2                                    | 0 | 0 | 842 | 2  |       |          |          | no  |                             | Non-apoplatic | 0.58 |
| <i>Vna8.815</i> | glutaminyl-peptide cyclotransferase VDBG_06381 [Verticillium alfalfae VaMs.102]                    | 98.92 | 0      | yes | yes | extr 23, cyto 2                                    | 1 | 0 | 371 | 1  |       |          |          | no  | Chloroplast (0.985   50-73) | Non-apoplatic | 0.65 |
| <i>Vna8.816</i> | glucoamylase [Verticillium dahliae VdLs.17] EGY22088                                               | 91.18 | 0      | yes | yes | extr 27                                            | 0 | 0 | 635 | 10 |       |          |          | yes |                             | Apoplatic     | 0.87 |
| <i>Vna8.820</i> | yetA [Verticillium dahliae VdLs.17] EGY22096                                                       | 92.65 | 0      | yes | yes | extr 22, mito 3                                    | 0 | 0 | 925 | 2  |       |          |          | no  |                             | Non-apoplatic | 0.66 |
| <i>Vna8.833</i> | hypothetical protein BNI708_014565 [Verticillium longisporum]                                      | 88.24 | 0      | yes | yes | extr 25                                            | 0 | 0 | 306 | 5  |       |          |          | no  |                             | Non-apoplatic | 0.75 |
| <i>Vna8.835</i> | alpha-N-arabinofuranosidase VDBG_06403 [Verticillium alfalfae VaMs.102]                            | 97.14 | 0      | yes | yes | extr 21, E.R. 2, golg 2                            | 1 | 0 | 490 | 1  |       |          |          | no  |                             | Non-apoplatic | 0.79 |
| <i>Vna8.836</i> | thymus-specific serine protease VDBG_06405 [Verticillium alfalfae VaMs.102]                        | 98.07 | 0      | yes | yes | extr 27                                            | 0 | 0 | 414 | 5  |       |          |          | no  |                             | Apoplatic     | 0.73 |
| <i>Vna9.19</i>  | endopolygalacturonase VDBG_06437 [Verticillium alfalfae VaMs.102]                                  | 99.46 | 0      | yes | yes | extr 23, cyto 2.5, cyto_nucl 2                     | 0 | 0 | 370 | 8  | -2.35 | 5.76E-08 | 1.76E-06 | yes |                             | Apoplatic     | 0.91 |
| <i>Vna9.21</i>  | conserved hypothetical protein VDBG_06439 [Verticillium alfalfae VaMs.102]                         | 98.64 | 0      | yes | yes | extr 27                                            | 1 | 1 | 588 | 7  |       |          |          | no  |                             | Apoplatic     | 0.81 |
| <i>Vna9.33</i>  | conserved hypothetical protein VDBG_06451 [Verticillium alfalfae VaMs.102]                         | 98.33 | 3E-83  | yes | yes | extr 15, E.R. 5, mito 3, plas 3                    | 1 | 0 | 120 | 6  |       |          |          | no  |                             | Non-apoplatic | 0.82 |
| <i>Vna9.47</i>  | endonuclease/exonuclease/phosphatase family VDBG_06466 [Verticillium alfalfae VaMs.102]            | 98.04 | 0      | yes | yes | extr 27                                            | 0 | 0 | 509 | 2  |       |          |          | no  |                             | Non-apoplatic | 0.6  |
| <i>Vna9.49</i>  | hypothetical protein BNI723_011226 [Verticillium longisporum]                                      | 92.77 | 0      | yes | yes | extr 15, mito 5, E.R. 4, golg 2                    | 0 | 0 | 444 | 3  |       |          |          | no  |                             | Non-apoplatic | 0.88 |
| <i>Vna9.57</i>  | cell wall protein VDBG_06480 [Verticillium alfalfae VaMs.102]                                      | 99.2  | 2E-135 | yes | yes | extr 26                                            | 0 | 1 | 267 | 2  |       |          |          | no  |                             | Apoplatic     | 0.84 |
| <i>Vna9.65</i>  | conserved hypothetical protein VDBG_06489 [Verticillium alfalfae VaMs.102]                         | 89.12 | 0      | yes | yes | extr 16, mito 8, nucl 1, pero 1, E.R. 1            | 0 | 0 | 625 | 39 |       |          |          | no  |                             | Apoplatic     | 0.61 |
| <i>Vna9.68</i>  | hypothetical protein BNI723_012410 [Verticillium longisporum]                                      | 98.42 | 3E-120 | yes | yes | extr 27                                            | 0 | 0 | 334 | 8  |       |          |          | no  |                             | Apoplatic     | 0.79 |
| <i>Vna9.69</i>  | predicted protein VDBG_06493 [Verticillium alfalfae VaMs.102]                                      | 98.5  | 0      | yes | yes | mito 10, plas 7, extr 7, cyto 2                    | 1 | 1 | 333 | 9  |       |          |          | no  |                             | Non-apoplatic | 0.81 |
| <i>Vna9.73</i>  | conserved hypothetical protein VDBG_06497 [Verticillium alfalfae VaMs.102]                         | 99.35 | 0      | yes | yes | extr 18, mito 3, cyto 2, mito_nucl 2               | 0 | 0 | 462 | 38 |       |          |          | no  |                             | Apoplatic     | 0.75 |
| <i>Vna9.74</i>  | cell wall glycosyl hydrolase YteR [Verticillium dahliae VdLs.17] EGY23598                          | 99.19 | 0      | yes | yes | extr 9, mito 7, cyto 5, pero 4, mito_nucl 4        | 0 | 0 | 388 | 1  | -6.60 | 2.95E-43 | 3.18E-41 | no  |                             | Non-apoplatic | 0.71 |
| <i>Vna9.77</i>  | hypothetical protein BNI708_003785 [Verticillium longisporum]                                      | 59.16 | 0      | yes | yes | extr 22, E.R. 2, mito 1, golg 1, vacu 1            | 0 | 0 | 560 | 6  |       |          |          | no  |                             | Non-apoplatic | 0.83 |
| <i>Vna9.78</i>  | hypothetical protein BNI723_010439 [Verticillium longisporum]                                      | 94.33 | 0      | yes | yes | extr 22, mito 5                                    | 0 | 0 | 597 | 3  |       |          |          | no  |                             | Non-apoplatic | 0.52 |
| <i>Vna9.81</i>  | endo-1,4-beta-xylanase VDBG_06505 [Verticillium alfalfae VaMs.102]                                 | 95.09 | 2E-155 | yes | yes | extr 27                                            | 0 | 0 | 224 | 3  |       |          |          | no  |                             | Apoplatic     | 0.69 |
| <i>Vna9.85</i>  | hypothetical protein BNI723_010448, partial [Verticillium longisporum]                             | 79.19 | 6E-87  | yes | yes | extr 26                                            | 0 | 0 | 343 | 5  |       |          |          | no  |                             | Apoplatic     | 0.62 |



|           |                                                                                                                  |       |        |     |     |                                                 |   |   |      |     |       |          |          |     |                              |                |      |
|-----------|------------------------------------------------------------------------------------------------------------------|-------|--------|-----|-----|-------------------------------------------------|---|---|------|-----|-------|----------|----------|-----|------------------------------|----------------|------|
| Vna9.535  | FAD binding domain-containing protein VDBG_09792 [Verticillium alfalfae VaMs.102]                                | 96.69 | 0      | yes | yes | extr 27                                         | 0 | 0 | 507  | 5   |       |          |          | no  | Chloroplast (0.947   65-110) | Non-apoplastic | 0.53 |
| Vna9.536  | conserved hypothetical protein VDBG_09793 [Verticillium alfalfae VaMs.102]                                       | 97.64 | 0      | yes | yes | extr 23, mito 1, cyto 1, pero 1, golg 1, cyto 1 | 0 | 0 | 381  | 6   |       |          |          | no  |                              | Non-apoplastic | 0.71 |
| Vna9.543  | hypothetical protein BN1708_003736 [Verticillium longisporum]                                                    | 98.77 | 1E-171 | yes | yes | extr 22, cyto 3                                 | 0 | 0 | 243  | 10  |       |          |          | no  |                              | Apoplastic     | 0.9  |
| Vna9.556  | oxidoreductase [Verticillium dahliae VdLs.17] EGY19215                                                           | 88.1  | 2E-172 | yes | yes | extr 21, cyto 3, cyto_nucl 2.333, cyto_mito 2   | 0 | 0 | 294  | 4   |       |          |          | no  |                              | Non-apoplastic | 0.86 |
| Vna9.561  | lysozyme VDBG_09821 [Verticillium alfalfae VaMs.102]                                                             | 98.4  | 2E-130 | yes | yes | extr 25                                         | 0 | 0 | 187  | 6   |       |          |          | no  |                              | Apoplastic     | 0.63 |
| Vna10.55  | hypothetical protein BN1708_014821 [Verticillium longisporum]                                                    | 98.14 | 0      | yes | yes | nucl 8.5, cyto_nucl 8, cyto 6.5, extr 6, mito 3 | 0 | 0 | 1666 | 7   |       |          |          | no  |                              | Non-apoplastic | 0.98 |
| Vna10.61  | malate dehydrogenase VDBG_09369 [Verticillium alfalfae VaMs.102]                                                 | 99.28 | 0      | yes | yes | extr 19, mito 5, pero 2                         | 0 | 0 | 276  | 5   |       |          |          | no  |                              | Non-apoplastic | 0.76 |
| Vna10.75  | predicted protein VDBG_09386 [Verticillium alfalfae VaMs.102]                                                    | 83.21 | 1E-75  | yes | yes | E.R. 7, extr 5, golg 5, nucl 4, cyto 2, vacu 2  | 0 | 0 | 286  | 5   |       |          |          | no  |                              | Non-apoplastic | 0.92 |
| Vna10.76  | predicted protein VDBG_09387 [Verticillium alfalfae VaMs.102]                                                    | 87.07 | 9E-58  | yes | yes | extr 7, E.R. 7, cyto 3.5, cyto_nucl 3, mito 2   | 0 | 0 | 124  | 3   |       |          |          | no  |                              | Non-apoplastic | 0.99 |
| Vna10.90  | bacterial alpha-L-rhamnosidase domain-containing protein VDBG_09404 [Verticillium alfalfae VaMs.102]             | 98.84 | 0      | yes | yes | extr 22, mito 3, cyto 1.5, cyto_nucl 1.5        | 0 | 0 | 688  | 5   |       |          |          | no  |                              | Non-apoplastic | 0.54 |
| Vna10.147 | necrosis-and ethylene-inducing protein and ethylene inducing peptide VDBG_09464 [Verticillium alfalfae VaMs.102] | 97.42 | 2E-169 | yes | yes | extr 25                                         | 0 | 0 | 233  | 3   |       |          |          | no  |                              | Apoplastic     | 0.71 |
| Vna10.150 | conserved hypothetical protein VDBG_09468 [Verticillium alfalfae VaMs.102]                                       | 98.29 | 0      | yes | yes | extr 26                                         | 0 | 0 | 468  | 1   |       |          |          | no  |                              | Non-apoplastic | 0.52 |
| Vna10.151 | predicted protein VDBG_09469 [Verticillium alfalfae VaMs.102]                                                    | 99.35 | 3E-105 | yes | yes | extr 17, nucl 3.5, mito 3, cyto_nucl 3, vacu 2  | 0 | 0 | 153  | 8   |       |          |          | no  |                              | Apoplastic     | 0.68 |
| Vna10.163 | pectate lyase B VDBG_09483 [Verticillium alfalfae VaMs.102]                                                      | 100   | 0      | yes | yes | extr 22, cyto 3                                 | 0 | 0 | 333  | 2   |       |          |          | no  |                              | Apoplastic     | 0.83 |
| Vna10.167 | predicted protein VDBG_09487 [Verticillium alfalfae VaMs.102]                                                    | 95.79 | 9E-50  | yes | yes | extr 14, E.R. 6, cyto 3, vacu 2, cyto_pero 2    | 0 | 0 | 95   | 2   |       |          |          | no  |                              | Non-apoplastic | 0.52 |
| Vna10.180 | hypothetical protein BN1708_000878 [Verticillium longisporum]                                                    | 97.08 | 0      | yes | yes | extr 14, mito 8, cyto 5                         | 0 | 0 | 468  | 4   |       |          |          | no  |                              | Apoplastic     | 0.63 |
| Vna10.187 | endo-1,4-beta-xylanase VDBG_09510 [Verticillium alfalfae VaMs.102]                                               | 98.2  | 0      | yes | yes | extr 22, cyto 4                                 | 0 | 0 | 334  | 2   |       |          |          | yes |                              | Non-apoplastic | 0.54 |
| Vna10.197 | hypothetical protein BN1708_000866 [Verticillium longisporum]                                                    | 99.47 | 0      | yes | yes | extr 22, mito 4                                 | 0 | 0 | 414  | 2   |       |          |          | no  |                              | Non-apoplastic | 0.57 |
| Vna10.198 | hypothetical protein BN1708_010392 [Verticillium longisporum]                                                    | 98.64 | 0      | yes | yes | extr 27                                         | 0 | 0 | 403  | 5   |       |          |          | yes |                              | Apoplastic     | 0.7  |
| Vna10.201 | hypothetical protein VDAG_04758 [Verticillium dahliae VdLs.17]                                                   | 81.27 | 2E-138 | yes | yes | extr 26                                         | 0 | 0 | 213  | 3   | -5.50 | 6.06E-12 | 3.14E-10 | no  |                              | Apoplastic     | 0.69 |
| Vna10.204 | hypothetical protein BN1708_010964 [Verticillium longisporum]                                                    | 98.28 | 0      | yes | yes | extr 26                                         | 0 | 0 | 910  | 4   |       |          |          | no  |                              | Non-apoplastic | 0.73 |
| Vna10.205 | hypothetical protein BN1708_010965 [Verticillium longisporum]                                                    | 98.82 | 0      | yes | yes | extr 18, mito 3, nucl 2, vacu 2, cyto_mito 2    | 0 | 0 | 422  | 6   | -5.94 | 2.89E-07 | 7.49E-06 | yes |                              | Non-apoplastic | 0.74 |
| Vna10.218 | hypothetical protein BN1708_010989 [Verticillium longisporum]                                                    | 88.36 | 4E-174 | yes | yes | extr 15, mito 4, vacu 3, cyto_mito 3            | 0 | 0 | 275  | 1   |       |          |          | no  |                              | Non-apoplastic | 0.61 |
| Vna10.234 | cellulose-growth-specific protein VDBG_09562 [Verticillium alfalfae VaMs.102]                                    | 94.39 | 0      | yes | yes | extr 26                                         | 0 | 0 | 321  | 8   |       |          |          | no  |                              | Apoplastic     | 0.81 |
| Vna10.236 | hypothetical protein BN1708_011226 [Verticillium longisporum]                                                    | 74.18 | 0      | yes | yes | extr 18, cyto 2.5, mito 2, cyto_nucl 2, vacu 2  | 1 | 1 | 433  | 5   |       |          |          | no  |                              | Non-apoplastic | 0.66 |
| Vna10.237 | hypothetical protein BN1708_015152 [Verticillium longisporum]                                                    | 94.67 | 0      | yes | yes | extr 21, mito 2, plas 2                         | 0 | 0 | 544  | 4   |       |          |          | no  |                              | Non-apoplastic | 0.71 |
| Vna10.240 | conserved hypothetical protein VDBG_09568 [Verticillium alfalfae VaMs.102]                                       | 98.43 | 0      | yes | yes | nucl 8, mito 7.5, cyto_mito 7, cyto 5.5, extr 4 | 0 | 0 | 1038 | 6   |       |          |          | no  |                              | Non-apoplastic | 0.94 |
| Vna10.241 | hypothetical protein BN1708_011214 [Verticillium longisporum]                                                    | 61.78 | 0      | yes | yes | extr 19, plas 2, E.R. 2, golg 2                 | 1 | 0 | 1015 | 2   |       |          |          | no  |                              | Non-apoplastic | 0.86 |
| Vna10.247 | hypothetical protein BN1723_009608 [Verticillium longisporum]                                                    | 60.84 | 2E-61  | yes | yes | extr 27                                         | 0 | 0 | 195  | 2   |       |          |          | no  |                              | Apoplastic     | 0.64 |
| Vna10.261 | peroxidase/catalase VDBG_09593 [Verticillium alfalfae VaMs.102]                                                  | 99.61 | 0      | yes | yes | extr 24, mito 2                                 | 0 | 0 | 772  | 5   |       |          |          | yes |                              | Non-apoplastic | 0.51 |
| Vna10.262 | acetylsterase VDBG_09594 [Verticillium alfalfae VaMs.102]                                                        | 98.8  | 1E-175 | yes | yes | extr 21, cyto 3, mito 2, cyto_nucl 2            | 0 | 0 | 249  | 0   | -3.65 | 1.21E-07 | 3.42E-06 | yes |                              | Apoplastic     | 0.55 |
| Vna10.263 | PRY1 VDBG_09595 [Verticillium alfalfae VaMs.102]                                                                 | 98.97 | 1E-139 | yes | yes | extr 15, mito 10                                | 0 | 0 | 198  | 5   |       |          |          | no  |                              | Apoplastic     | 0.7  |
| Vna10.269 | necrosis-and ethylene-inducing protein-inducing protein VDBG_09602 [Verticillium alfalfae VaMs.102]              | 98.56 | 0      | yes | yes | extr 24, vacu 2                                 | 0 | 0 | 277  | 5   |       |          |          | no  |                              | Non-apoplastic | 0.72 |
| Vna10.272 | galactose oxidase VDBG_09605 [Verticillium alfalfae VaMs.102]                                                    | 97.55 | 0      | yes | yes | extr 23, cyto 2                                 | 0 | 0 | 734  | 17  |       |          |          | no  |                              | Apoplastic     | 0.64 |
| Vna10.278 | alpha-N-arabinofuranosidase A [Verticillium dahliae VdLs.17] EGY18580                                            | 93.29 | 0      | yes | yes | extr 26                                         | 0 | 0 | 656  | 2   |       |          |          | no  |                              | Non-apoplastic | 0.62 |
| Vna10.280 | hypothetical protein BN1708_006137 [Verticillium longisporum]                                                    | 88.39 | 0      | yes | yes | extr 25                                         | 1 | 1 | 465  | 8   |       |          |          | no  |                              | Apoplastic     | 0.56 |
| Vna10.309 | conserved hypothetical protein VDBG_09642 [Verticillium alfalfae VaMs.102]                                       | 99.67 | 0      | yes | yes | extr 25                                         | 0 | 0 | 307  | 6   |       |          |          | no  |                              | Apoplastic     | 0.86 |
| Vna10.313 | bacterial leucyl aminopeptidase VDBG_09646 [Verticillium alfalfae VaMs.102]                                      | 96.6  | 0      | yes | yes | extr 23, mito 1, cyto 1, E.R. 1, vacu 1, cyto 1 | 0 | 0 | 353  | 1   |       |          |          | no  |                              | Non-apoplastic | 0.83 |
| Vna10.319 | hypothetical protein BN1723_003773, partial [Verticillium longisporum]                                           | 99.35 | 0      | yes | yes | extr 24, mito 2                                 | 0 | 0 | 535  | 4   |       |          |          | yes | Chloroplast (0.998   40-62)  | Apoplastic     | 0.78 |
| Vna10.324 | hypothetical protein BN1708_000847 [Verticillium longisporum]                                                    | 59.33 | 0      | yes | yes | extr 20, mito 6                                 | 0 | 0 | 672  | 9   | 1.45  | 5.51E-08 | 1.69E-06 | no  |                              | Apoplastic     | 0.87 |
| Vna10.326 | spherulin-1A VDBG_09662 [Verticillium alfalfae VaMs.102]                                                         | 81.44 | 2E-45  | yes | yes | extr 24, mito 1, E.R. 1, golg 1                 | 0 | 0 | 128  | 4   |       |          |          | no  |                              | Non-apoplastic | 0.62 |
| VnaUn.4   | vesicular integral-membrane protein VIP36 VDBG_08815 [Verticillium alfalfae VaMs.102]                            | 100   | 0      | yes | yes | extr 22, golg 2, plas 1, E.R. 1, vacu 1         | 1 | 1 | 320  | 2   |       |          |          | no  |                              | Non-apoplastic | 0.63 |
| VnaUn.10  | hypothetical protein VDBG_08821 [Verticillium alfalfae VaMs.102]                                                 | 98.85 | 4E-105 | yes | yes | extr 27                                         | 0 | 0 | 174  | 0   |       |          |          | no  |                              | Apoplastic     | 0.74 |
| VnaUn.80  | conserved hypothetical protein VDBG_07835 [Verticillium alfalfae VaMs.102]                                       | 98.19 | 0      | yes | yes | extr 25                                         | 0 | 0 | 393  | 4   |       |          |          | no  |                              | Apoplastic     | 0.56 |
| VnaUn.100 | hypothetical protein BN1708_006960 [Verticillium longisporum]                                                    | 91.48 | 0      | yes | yes | extr 11, E.R. 6, golg 4, mito 3, vacu 3         | 1 | 0 | 909  | 184 |       |          |          | no  |                              | Non-apoplastic | 0.51 |
| VnaUn.101 | pectate lyase L [Verticillium dahliae VdLs.17] EGY16186                                                          | 98.5  | 0      | yes | yes | extr 26                                         | 0 | 0 | 399  | 1   | -3.12 | 2.69E-15 | 1.98E-13 | no  |                              | Apoplastic     | 0.68 |
| VnaUn.103 | hypothetical protein VDAG_07353 [Verticillium dahliae VdLs.17]                                                   | 98.85 | 3E-117 | yes | yes | plas 14, E.R. 6, extr 4, mito 2                 | 1 | 1 | 442  | 1   |       |          |          | no  |                              | Non-apoplastic | 0.54 |
| VnaUn.114 | conserved hypothetical protein VDBG_09208 [Verticillium alfalfae VaMs.102]                                       | 98.8  | 2E-114 | yes | yes | extr 16, mito 4, plas 4, E.R. 2, cyto_mito 2, r | 0 | 0 | 166  | 1   |       |          |          | no  |                              | Non-apoplastic | 0.61 |
| VnaUn.116 | hypothetical protein BN1708_016216, partial [Verticillium longisporum]                                           | 50.81 | 0      | yes | yes | extr 22, mito 3                                 | 0 | 0 | 923  | 4   | -2.87 | 1.70E-07 | 4.60E-06 | no  |                              | Non-apoplastic | 0.58 |
| VnaUn.119 | predicted protein VDBG_09216 [Verticillium alfalfae VaMs.102]                                                    | 88.03 | 7E-130 | yes | yes | cyto 6.5, cyto_nucl 6, nucl 4.5, mito 4, extr 4 | 0 | 0 | 368  | 6   |       |          |          | no  |                              | Non-apoplastic | 0.69 |
| VnaUn.121 | hypothetical protein BN1708_012113 [Verticillium longisporum]                                                    | 96.61 | 0      | yes | yes | extr 26                                         | 0 | 0 | 902  | 3   |       |          |          | no  |                              | Non-apoplastic | 0.52 |
| VnaUn.125 | hypothetical protein BN1708_003714 [Verticillium longisporum]                                                    | 96.23 | 0      | yes | yes | extr 17, plas 7, pero 2                         | 0 | 1 | 481  | 14  |       |          |          | no  |                              | Apoplastic     | 0.67 |
| VnaUn.134 | endoplasmic reticulum mannosyl-oligosaccharide 1,2-alpha-mannosidase VDBG_09835 [Verticillium alfalfae VaMs.102] | 99.65 | 0      | yes | yes | extr 12, plas 7, E.R. 3, golg 3                 | 1 | 0 | 566  | 6   |       |          |          | no  | Chloroplast (0.992   36-59)  | Non-apoplastic | 0.9  |
| VnaUn.138 | conserved hypothetical protein VDBG_09840 [Verticillium alfalfae VaMs.102]                                       | 97.94 | 0      | yes | yes | extr 25                                         | 0 | 0 | 486  | 2   |       |          |          | no  |                              | Apoplastic     | 0.68 |
| VnaUn.140 | GMC oxidoreductase [Colletotrichum graminicola M1.001]                                                           | 50.78 | 5E-82  | yes | yes | extr 22, cyto 3                                 | 0 | 0 | 432  | 2   | -1.80 | 9.45E-10 | 3.71E-08 | no  |                              | Apoplastic     | 0.83 |
| VnaUn.141 | choline dehydrogenase VDBG_09843 [Verticillium alfalfae VaMs.102]                                                | 99.06 | 0      | yes | yes | extr 26                                         | 0 | 0 | 639  | 4   |       |          |          | no  |                              | Non-apoplastic | 0.57 |
| VnaUn.143 | beta-hexosaminidase beta chain [Verticillium dahliae VdLs.17] EGY23046                                           | 69.68 | 0      | yes | yes | extr 19, cyto 3.5, cyto_nucl 3, mito 2          | 0 | 0 | 609  | 7   |       |          |          | no  |                              | Non-apoplastic | 0.83 |
| VnaUn.190 | hypothetical protein BN1708_000644 [Verticillium longisporum]                                                    | 84.31 | 0      | yes | yes | extr 23, vacu 2                                 | 0 | 0 | 580  | 9   |       |          |          | no  |                              | Apoplastic     | 0.65 |
| VnaUn.206 | hypothetical protein BN1723_009397, partial [Verticillium longisporum]                                           | 49.16 | 2E-77  | yes | yes | extr 12, cyto 8, mito 5                         | 0 | 0 | 284  | 6   |       |          |          | no  |                              | Non-apoplastic | 0.52 |
| VnaUn.210 | hypothetical protein VDAG_02988 [Verticillium dahliae VdLs.17]                                                   | 27.91 | 9E-40  | yes | yes | nucl 9, cyto 8, mito 3, extr 3, pero 2, E.R. 2  | 0 | 0 | 489  | 5   |       |          |          | no  |                              | Non-apoplastic | 0.97 |
| VnaUn.211 | glycosyl hydrolase [Verticillium dahliae VdLs.17] EGY21462                                                       | 77.64 | 0      | yes | yes | extr 25                                         | 0 | 1 | 805  | 6   |       |          |          | no  |                              | Apoplastic     | 0.66 |
| VnaUn.214 | conserved hypothetical protein VDBG_02503 [Verticillium alfalfae VaMs.102]                                       | 99.25 | 0      | yes | yes | extr 25                                         | 0 | 0 | 266  | 2   |       |          |          | no  |                              | Non-apoplastic | 0.53 |

|                  |                                                                              |       |        |     |     |                                                 |   |   |     |   |       |          |          |     |                              |               |      |
|------------------|------------------------------------------------------------------------------|-------|--------|-----|-----|-------------------------------------------------|---|---|-----|---|-------|----------|----------|-----|------------------------------|---------------|------|
| <b>VnaUn.216</b> | cell wall protein PhiA VDBG_02501 [Verticillium alfalfae VaMs.102]           | 99.48 | 3E-135 | yes | yes | extr 26                                         | 0 | 0 | 193 | 5 |       |          |          | yes | Chloroplast (0.891   38-78)  | Apoplatic     | 0.79 |
| <b>VnaUn.218</b> | sucrose-6-phosphate hydrolase VDBG_02499 [Verticillium alfalfae VaMs.102]    | 98.65 | 0      | yes | yes | extr 25                                         | 0 | 0 | 679 | 5 | -8.32 | 4.54E-10 | 1.88E-08 | no  |                              | Non-apoplatic | 0.53 |
| <b>VnaUn.223</b> | neutral protease VDBG_02494 [Verticillium alfalfae VaMs.102]                 | 92.02 | 0      | yes | yes | extr 20, mito 4, cyto 2, mito_nucl 2            | 0 | 0 | 328 | 6 |       |          |          | no  |                              | Apoplatic     | 0.57 |
| <b>VnaUn.228</b> | hypothetical protein BN1708_006541 [Verticillium longisporum]                | 95.14 | 5E-169 | yes | yes | extr 22, mito 2, pero 1, E.R. 1, vacu 1, cyto   | 0 | 0 | 319 | 4 |       |          |          | no  |                              | Apoplatic     | 0.59 |
| <b>VnaUn.262</b> | conserved hypothetical protein VDBG_05827 [Verticillium alfalfae VaMs.102]   | 92.86 | 2E-89  | yes | yes | extr 25                                         | 0 | 0 | 140 | 1 |       |          |          | no  |                              | Apoplatic     | 0.55 |
| <b>VnaUn.273</b> | carbonic anhydrase VDBG_08877 [Verticillium alfalfae VaMs.102]               | 99.26 | 0      | yes | yes | extr 24, mito 2                                 | 0 | 0 | 271 | 4 |       |          |          | no  |                              | Apoplatic     | 0.71 |
| <b>VnaUn.279</b> | hypothetical protein VDAG_04921 [Verticillium dahliae VdLs.17]               | 44.59 | 1E-11  | yes | yes | extr 19, cyto 5, mito 2                         | 0 | 0 | 92  | 0 |       |          |          | no  |                              | Apoplatic     | 0.62 |
| <b>VnaUn.287</b> | hypothetical protein BN1708_006953 [Verticillium longisporum]                | 93.67 | 1E-153 | yes | yes | extr 24, mito 1, plas 1, E.R. 1                 | 0 | 0 | 237 | 4 |       |          |          | no  |                              | Non-apoplatic | 0.54 |
| <b>VnaUn.291</b> | L-amino-acid oxidase VDBG_09183 [Verticillium alfalfae VaMs.102]             | 99.56 | 0      | yes | yes | extr 12, plas 6, mito 3, cyto 3, cyto_mito 3    | 0 | 0 | 687 | 6 |       |          |          | no  |                              | Non-apoplatic | 0.94 |
| <b>VnaUn.334</b> | translation initiation inhibitor VDBG_03154 [Verticillium alfalfae VaMs.102] | 98.68 | 2E-102 | yes | yes | extr 22, mito 3                                 | 0 | 0 | 151 | 1 |       |          |          | no  |                              | Apoplatic     | 0.59 |
| <b>VnaUn.335</b> | L-amino-acid oxidase VDBG_03155 [Verticillium alfalfae VaMs.102]             | 98.23 | 0      | yes | yes | extr 13, mito 4, plas 4, cyto 2, E.R. 2, mito_r | 0 | 0 | 679 | 6 |       |          |          | no  |                              | Non-apoplatic | 0.87 |
| <b>VnaUn.337</b> | TRI14 VDBG_03157 [Verticillium alfalfae VaMs.102]                            | 97.97 | 0      | yes | yes | extr 25                                         | 0 | 0 | 345 | 3 |       |          |          | no  |                              | Apoplatic     | 0.67 |
| <b>VnaUn.340</b> | hypothetical protein BN1708_009017 [Verticillium longisporum]                | 73.17 | 0      | yes | yes | extr 17, cyto 5.5, cyto_nucl 4.833, cyto_mito   | 0 | 0 | 582 | 4 |       |          |          | yes |                              | Non-apoplatic | 0.65 |
| <b>VnaUn.405</b> | hypothetical protein BN1723_003543 [Verticillium longisporum]                | 91.86 | 0      | yes | yes | plas 13, extr 9, E.R. 2, cyto 1, golg 1, vacu 1 | 0 | 0 | 502 | 3 |       |          |          | no  | Mitochondria (0.928   21-42) | Non-apoplatic | 0.93 |
| <b>VnaUn.406</b> | cellulose-binding family II [Verticillium dahliae VdLs.17] EGY20564          | 64.41 | 4E-172 | yes | yes | extr 24, cyto 1.5, cyto_nucl 1.5                | 0 | 0 | 397 | 9 | 2.71  | 0        | 0        | no  | Chloroplast (0.978   31-57)  | Apoplatic     | 0.67 |
| <b>VnaUn.436</b> | hypothetical protein BN1723_010903 [Verticillium longisporum]                | 48.2  | 4E-23  | yes | yes | extr 20, plas 3, cyto 2                         | 0 | 0 | 97  | 4 |       |          |          | no  |                              | Non-apoplatic | 0.6  |
| <b>VnaUn.478</b> | carbohydrate-binding module family 1 protein [Colletotrichum incanum]        | 52.76 | 1E-113 | yes | yes | extr 26                                         | 0 | 0 | 276 | 8 |       |          |          | no  |                              | Apoplatic     | 0.78 |
| <b>VnaUn.480</b> | predicted protein VDBG_06216 [Verticillium alfalfae VaMs.102]                | 97.91 | 1E-104 | yes | yes | extr 13, mito 8, cyto 4                         | 0 | 0 | 191 | 7 |       |          |          | no  | Chloroplast (0.962   44-69)  | Apoplatic     | 0.81 |
